# Supplementary material for: A global delta dataset and the environmental variables that predict delta formation on marine coastlines
Source: Copernicus journal article supplement (doi:10.5194/esurf-7-773-2019), 2019-08-26
Supplement: Supplementary file 1 [file esurf-7-773-2019-supplement.zip]

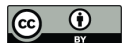

## *Supplement of*

# **A global delta dataset and the environmental variables that predict delta formation on marine coastlines**

**Rebecca L. Caldwell et al.**

*Correspondence to:* Rebecca L. Caldwell ([rcaldwell93@gmail.com](mailto:rcaldwell93@gmail.com))

- [esurf-7-773-2019-supplement-title-page.pdf](#)
- [Supplemental\\_Table\\_1.xlsx](#)

The copyright of individual parts of the supplement might differ from the CC BY 4.0 License.
