# Supplementary material for: A global delta dataset and the environmental variables that predict delta formation on marine coastlines
Source: Copernicus journal article supplement (doi:10.5194/esurf-7-773-2019), 2019-08-26
Supplement: Supplementary file 1 [file Supplemental_Table_1.xlsx]

## Sheet: Dataset
Identification		Location Data			Upstream Environmental Variables (from Milliman and Farnsworth, 2011)		Downstream Environmental Variables
		Region	Main River Mouth (RM)		M&F ID
ID	Delta_Presence		RM_Lat	RM_Lon	#_M&F_matches	M&F_ID(s)	Wave_Height_Hw (m)	Tidal_Range_Ht (m)	Bathymetric_Slope_from_RM_Sbr	Sea_Level_Change (mm yr^-1)
0001	1	AFR	31.4691	30.3648	1	36	0.744348	0.272	0.00102499	3.40988
0002	1	AFR	32.3783	23.0905	0	NaN	1.29096	0.081	0.00200707	3.57105
0003	0	AFR	32.6534	23.008	0	NaN	1.69375	0.073	0.00814607	3.82992
0004	0	AFR	32.6696	22.9295	0	NaN	1.69375	0.071	0.00596544	3.82992
0005	0	AFR	32.7864	21.4061	0	NaN	1.68782	0.054	0.0181574	3.79558
0006	0	AFR	31.0228	17.4746	0	NaN	1.73095	0.147	0.00238339	2.97399
0007	0	AFR	32.7927	13.5981	0	NaN	1.54647	0.232	0.00272166	2.59431
0008	0	AFR	33.6553	10.5706	0	NaN	0.927732	0.874	0.000608005	1.90525
0009	1	AFR	34.5395	10.5936	0	NaN	0.651427	0.837	0.00100777	1.65273
0010	0	AFR	34.695	10.7504	0	NaN	1.04746	0.741	0.000764903	1.65273
0011	1	AFR	35.9884	10.5055	0	NaN	1.18483	0.218	0.00278685	2.29102
0012	0	AFR	36.3077	10.5052	0	NaN	1.0962	0.213	0.00359115	2.40904
0013	0	AFR	36.6494	10.9179	0	NaN	1.0962	0.1635	0.00270048	2.6259
0014	0	AFR	36.7123	10.9632	0	NaN	1.0962	0.1615	0.00301777	2.92118
0015	0	AFR	36.8153	11.0594	0	NaN	1.0962	0.1585	0.00384843	2.92118
0016	0	AFR	36.7533	10.5277	0	NaN	1.11446	0.2155	0.00135804	2.93827
0017	0	AFR	36.719	10.4302	0	NaN	1.11446	0.221	0.00145762	2.93827
0018	0	AFR	36.8478	7.94357	0	NaN	1.64339	0.241	0.00297509	3.03045
0019	0	AFR	36.8681	7.77373	1	8	1.64339	0.239	0.00358921	3.09575
0020	0	AFR	37.001	7.25225	0	NaN	1.33199	0.234	0.0253721	2.77232
0021	0	AFR	36.8713	6.08328	1	5	1.75768	0.224	0.0385069	2.60441
0022	0	AFR	36.6419	5.33738	1	1	1.75171	0.214	0.0281044	2.65035
0023	0	AFR	36.7289	5.07676	1	9	1.68892	0.212	0.0422639	2.50303
0024	0	AFR	36.8862	4.51484	0	NaN	1.63983	0.205	0.0714777	2.25034
0025	0	AFR	36.9122	3.85419	1	7	1.60375	0.1925	0.0817944	2.2074
0026	0	AFR	36.8389	3.66684	1	4	1.60109	0.19	0.0653769	2.1185
0027	1	AFR	36.5683	2.0086	0	NaN	1.67347	0.17	0.076713	2.43943
0028	1	AFR	36.3341	0.740318	0	NaN	1.59436	0.1965	0.0481716	2.34844
0029	0	AFR	36.3155	0.642225	0	NaN	1.59436	0.2	0.0515098	2.34844
0030	0	AFR	35.298	-1.47163	1	10	NaN	0.2925	0.00670348	1.85743
0031	0	AFR	35.124	-2.33994	1	102	NaN	0.3285	0.00517082	3.24011
0032	1	AFR	35.2268	-3.19592	0	NaN	NaN	0.385	0.00381598	3.11281
0033	1	AFR	35.2182	-3.53713	0	NaN	NaN	0.424	0.0049382	3.00812
0034	1	AFR	35.2216	-3.55986	0	NaN	NaN	0.4275	0.00482727	3.00812
0035	0	AFR	35.1995	-3.82345	1	103	NaN	0.442	0.00661499	3.06383
0036	1	AFR	35.2026	-3.86962	0	NaN	NaN	0.447	0.00871373	3.06383
0037	0	AFR	35.1714	-4.29294	0	NaN	NaN	0.469	0.0123547	2.47694
0038	0	AFR	35.1559	-4.431	0	NaN	NaN	0.4825	0.0124244	2.14161
0039	0	AFR	35.1756	-4.52091	0	NaN	NaN	0.484	0.013294	2.14161
0040	1	AFR	35.206	-4.68232	0	NaN	NaN	0.491	0.0144102	2.45876
0041	1	AFR	35.3318	-4.93745	0	NaN	NaN	0.5	0.0112876	1.97648
0042	0	AFR	35.4355	-5.08104	0	NaN	NaN	0.505	0.00793241	2.04586
0043	0	AFR	35.6034	-5.265	0	NaN	NaN	0.513	0.0107087	2.05206
0044	0	AFR	35.5693	-5.99928	1	101	1.50957	1.727	0.00391293	2.59203
0045	0	AFR	35.202	-6.15273	1	98	2.24679	1.925	0.00462026	2.63702
0046	1	AFR	34.263	-6.67916	1	105	2.53736	1.922	0.0041541	2.45265
0047	0	AFR	34.0377	-6.83789	1	96	2.47258	1.9215	0.0047125	2.4038
0048	0	AFR	33.3198	-8.33916	1	104	3.01111	1.905	0.00195937	3.1146
0049	0	AFR	32.0333	-9.34529	1	107	2.33609	1.894	0.00171423	3.28861
0050	1	AFR	31.4901	-9.77311	0	NaN	2.80441	1.878	0.00235377	3.3078
0051	0	AFR	31.0912	-9.81995	0	NaN	2.6023	1.877	0.00311236	3.0346
0052	0	AFR	30.3643	-9.60691	1	106	2.60412	1.862	0.0035394	2.39394
0053	0	AFR	30.0811	-9.67222	1	99	2.61961	1.861	0.00432322	2.30484
0054	0	AFR	28.6828	-11.1228	1	97	2.78731	1.8725	0.00300899	2.91904
0055	0	AFR	28.2951	-11.5411	0	NaN	2.30995	1.897	0.00205162	2.74209
0056	0	AFR	28.2118	-11.7824	0	NaN	2.51242	1.905	0.00215109	2.68564
0057	0	AFR	28.1785	-11.8734	0	NaN	2.51242	1.895	0.002147	2.68564
0058	0	AFR	27.1963	-13.3884	1	195	1.43272	1.608	0.00267651	2.96392
0059	1	AFR	15.918	-16.519	1	142	2.25883	1.002	0.00173366	3.32473
0060	1	AFR	13.9088	-16.7618	1	143	0.913845	1.11	0.000394538	3.51566
0061	0	AFR	13.4717	-16.5644	1	46	1.13036	1.115	0.000296834	3.33097
0062	1	AFR	12.5544	-16.7679	1	141	1.04253	1.1535	0.000436183	2.39683
0063	0	AFR	12.1432	-16.3916	1	54	0.502287	1.581	0.000187976	0.7896
0064	0	AFR	11.7203	-15.6175	2	55, 56	0.405205	2.443	0.000316158	1.64178
0065	1	AFR	11.1055	-15.2176	0	NaN	0.518812	2.3975	8.18103e-05	2.32903
0066	1	AFR	10.8083	-14.8566	1	52	0.767105	2.432	0.000215715	2.81037
0067	1	AFR	10.6183	-14.6563	0	NaN	0.767105	2.4275	0.000214188	2.73374
0068	1	AFR	10.037	-14.0798	1	51	0.446171	2.281	0.000364521	2.56376
0069	1	AFR	9.79768	-13.7638	1	53	0.446171	2.1445	0.000244657	2.67686
0070	0	AFR	9.75359	-13.6004	0	NaN	0.446171	2.1445	7.34223e-05	2.84067
0071	1	AFR	9.27958	-13.3365	0	NaN	0.719717	1.8325	0.00023437	2.98296
0072	1	AFR	8.93182	-13.2451	2	144, 146	0.719717	1.7295	0.000304111	3.25119
0073	0	AFR	8.50559	-13.1839	1	149	1.1003	1.327	0.000284516	3.6516
0074	0	AFR	8.22753	-12.9963	0	NaN	0.531712	1.1505	0.000273676	3.70632
0075	0	AFR	8.08884	-12.903	0	NaN	0.531712	1.145	0.000254555	3.89156
0076	0	AFR	7.95465	-12.9	0	NaN	0.531712	1.145	0.000188185	3.89156
0077	0	AFR	7.67515	-12.5666	0	NaN	1.31738	1.0245	0.000106245	3.63941
0078	1	AFR	7.3878	-12.5265	2	145, 150	1.31738	1.0165	0.00172906	3.41619
0079	1	AFR	6.98008	-11.6075	2	147, 148	1.71043	0.998	0.0020371	3.01957
0080	1	AFR	6.78383	-11.3665	0	NaN	1.82644	0.993	0.00216807	2.96857
0081	0	AFR	6.57809	-11.0607	1	70	1.59048	0.985	0.00221001	3.06888
0082	0	AFR	6.50363	-10.9268	0	NaN	1.59048	0.982	0.00187672	3.28259
0083	1	AFR	6.37928	-10.8007	1	72	1.59048	0.9725	0.00198872	3.28259
0084	0	AFR	6.1326	-10.3789	0	NaN	1.66534	0.963	0.00199836	3.49598
0085	0	AFR	5.91152	-10.0685	1	71	1.71643	0.954	0.00208112	3.61824
0086	0	AFR	5.78693	-9.97217	0	NaN	1.71643	0.95	0.00263978	3.61824
0087	0	AFR	5.5719	-9.72976	0	NaN	1.71643	0.938	0.00252082	3.70681
0088	0	AFR	5.44691	-9.5885	1	69	1.71643	0.937	0.00319597	3.69938
0089	0	AFR	5.38239	-9.50191	0	NaN	1.73493	0.928	0.00261355	3.69938
0090	0	AFR	5.20723	-9.34702	0	NaN	1.73493	0.927	0.00280949	3.60499
0091	0	AFR	5.15648	-9.28673	0	NaN	1.73493	0.915	0.00298634	3.60499
0092	0	AFR	5.10548	-9.20155	0	NaN	1.73493	0.9125	0.00306032	3.60499
0093	0	AFR	4.99399	-9.03904	0	NaN	1.73493	0.906	0.00300704	3.52657
0094	0	AFR	4.9474	-8.9181	0	NaN	1.86542	0.901	0.0032063	3.40261
0095	0	AFR	4.8367	-8.7497	0	NaN	1.79036	0.9	0.00280131	3.40261
0096	0	AFR	4.75354	-8.56105	0	NaN	1.79036	0.899	0.00176666	3.32917
0097	0	AFR	4.72528	-8.50865	0	NaN	1.79036	0.899	0.00181423	3.32917
0098	0	AFR	4.63534	-8.34148	0	NaN	1.79036	0.899	0.00238964	3.21926
0099	0	AFR	4.53423	-8.05353	0	NaN	1.5957	0.901	0.002115	3.16969
0100	0	AFR	4.4984	-7.93939	0	NaN	1.5957	0.9065	0.00198877	3.15358
0101	0	AFR	4.456	-7.83279	0	NaN	1.5957	0.907	0.00231691	3.15358
0102	0	AFR	4.36173	-7.52732	1	68	1.96483	0.927	0.00785996	3.14364
0103	0	AFR	4.41034	-7.35619	0	NaN	1.67115	0.937	0.00507446	3.13808
0104	0	AFR	4.66177	-6.91508	0	NaN	1.67115	0.9515	0.00221203	3.14612
0105	0	AFR	4.75533	-6.59989	1	64	1.84971	0.959	0.00220707	3.14829
0106	0	AFR	4.77139	-6.5576	0	NaN	1.84971	0.9595	0.00204124	3.14829
0107	0	AFR	4.9593	-6.07601	1	63	1.88844	0.973	0.00244372	3.13786
0108	0	AFR	4.99315	-5.97629	0	NaN	1.62983	0.9765	0.002144	3.16272
0109	1	AFR	5.08026	-5.57613	0	NaN	1.62983	0.984	0.00261271	3.1846
0110	1	AFR	5.21378	-5.24494	1	60	1.81036	0.9885	0.00120123	3.20845
0111	0	AFR	5.13813	-4.97874	1	58	1.81036	0.992	0.00683949	3.24402
0112	1	AFR	5.19096	-3.72203	2	61, 62	1.78803	1.017	0.00388423	3.34007
0113	1	AFR	5.34942	-3.2025	1	59	1.61434	1.032	0.000282414	NaN
0114	1	AFR	5.10458	-2.94008	1	65	1.61434	1.04	0.00207811	3.40795
0115	0	AFR	4.89842	-2.26925	1	47	1.94422	1.085	0.00220518	3.56872
0116	0	AFR	4.79528	-2.14193	0	NaN	1.92784	1.11	0.00281304	3.61621
0117	0	AFR	4.87445	-1.76793	0	NaN	1.37242	1.141	0.00203175	3.64814
0118	0	AFR	5.01354	-1.62897	1	49	1.37242	1.182	0.0016402	3.63964
0119	0	AFR	5.69346	0.068186	0	NaN	1.56994	1.1965	0.00215218	3.09727
0120	0	AFR	5.74193	0.180215	0	NaN	1.56994	1.197	0.00223314	3.09727
0121	1	AFR	5.76926	0.68073	1	50	1.78656	1.209	0.00196065	3.24436
0122	0	AFR	6.2813	1.84764	1	192	1.80564	1.233	0.00172447	3.56487
0123	1	AFR	6.45237	2.52683	1	26	1.84657	1.241	0.000666173	3.51658
0124	1	AFR	4.32321	5.96831	2	138, 140	1.76773	1.336	0.000650488	2.92766
0125	1	AFR	4.80615	8.31875	1	137	0.463284	1.513	0.000168349	2.89822
0126	0	AFR	4.77244	8.385	0	NaN	0.463284	1.513	0.000222952	2.89822
0127	1	AFR	4.51703	8.75054	0	NaN	0.463284	1.508	0.000414966	2.83188
0128	0	AFR	4.25709	8.93467	0	NaN	0.374063	1.454	0.0010924	2.73619
0129	1	AFR	4.0138	9.55822	1	29	1.05389	1.423	6.50164e-05	2.5461
0130	0	AFR	4.06225	9.69166	1	33	1.05389	1.435	5.89113e-05	2.5461
0131	1	AFR	3.92658	9.66889	0	NaN	1.05389	1.389	6.38345e-05	2.44565
0132	1	AFR	3.54846	9.64145	1	32	1.05389	1.3465	0.00112438	2.33958
0133	0	AFR	3.2612	9.903	1	31	1.05389	1.337	0.000961167	2.21818
0134	0	AFR	3.21748	9.92261	0	NaN	1.22934	1.329	0.000942453	2.21818
0135	0	AFR	2.94121	9.90503	1	28	1.22934	1.316	0.00157321	2.17143
0136	0	AFR	2.88415	9.89706	1	27	1.22934	1.313	0.00169567	2.20524
0137	0	AFR	2.34925	9.82132	1	30	1.13977	1.297	0.0014623	2.53691
0138	0	AFR	1.59971	9.60137	1	42	0.86202	1.284	0.00255394	2.8038
0139	0	AFR	1.06129	9.75061	0	NaN	0.481797	1.296	5.11734e-05	2.74899
0140	0	AFR	0.517314	9.60431	0	NaN	0.481797	1.2865	5.68387e-05	2.57592
0141	0	AFR	0.15356	9.74302	1	43	NaN	1.362	6.51659e-05	2.45618
0142	1	AFR	-0.963261	8.8456	1	45	1.90588	1.1705	0.00188521	2.83609
0143	0	AFR	-2.97899	10.2696	1	44	1.81322	1.107	0.00125569	3.1097
0144	0	AFR	-4.10836	11.3424	0	NaN	1.80551	1.096	0.0013257	3.09119
0145	0	AFR	-4.46167	11.6907	1	35	1.69766	1.099	0.000737716	3.20616
0146	0	AFR	-5.20439	12.1325	1	15	1.46816	1.09	0.00105533	3.36695
0147	1	AFR	-6.07474	12.3991	1	34	1.79	1.106	0.00253536	3.36553
0148	0	AFR	-7.20316	12.8507	1	25	1.78109	1.0195	0.0013772	2.77421
0149	0	AFR	-7.72368	13.057	0	NaN	1.57412	1.001	0.00175828	2.73165
0150	0	AFR	-7.81489	13.0984	1	23	1.57412	1.001	0.00143832	2.73165
0151	0	AFR	-8.46986	13.3715	1	22	1.50102	0.9945	0.00149223	2.94336
0152	0	AFR	-8.75068	13.3938	1	12	1.66892	0.992	0.0010422	3.00386
0153	0	AFR	-9.33493	13.1439	1	17	1.87741	0.9795	0.00158883	2.92652
0154	0	AFR	-10.0871	13.4062	0	NaN	1.94291	0.968	0.00225248	2.68963
0155	0	AFR	-10.2825	13.5276	1	24	1.52915	0.9665	0.0024129	2.56513
0156	0	AFR	-10.8604	13.7957	1	21	1.42774	0.956	0.00328168	2.147
0157	0	AFR	-11.3117	13.8266	0	NaN	1.19289	0.9515	0.00161311	1.92578
0158	0	AFR	-11.9567	13.762	0	NaN	0.818103	0.941	0.00304369	1.99045
0159	1	AFR	-12.4462	13.474	1	14	0.818103	0.938	0.00480685	2.05766
0160	1	AFR	-12.5565	13.4056	0	NaN	0.979783	0.936	0.00339552	2.05766
0161	1	AFR	-12.8951	12.9485	1	16	0.979783	0.929	0.0256177	2.31656
0162	0	AFR	-13.9518	12.4161	0	NaN	1.80726	0.903	0.0136886	2.73305
0163	0	AFR	-14.0428	12.3855	0	NaN	1.80726	0.9025	0.00645087	2.73305
0164	1	AFR	-14.2774	12.3618	0	NaN	1.61374	0.898	0.00797658	2.84015
0165	0	AFR	-14.6954	12.276	0	NaN	1.61374	0.889	0.035258	3.19272
0166	0	AFR	-15.069	12.1389	0	NaN	1.64475	0.885	0.0197558	3.24944
0167	0	AFR	-15.1668	12.1537	1	18	1.64475	0.884	0.00773683	3.28436
0168	0	AFR	-15.7232	11.9098	1	20	1.29461	0.876	0.00519408	3.3429
0169	1	AFR	-17.2525	11.7502	1	19	2.82927	0.855	0.00463343	3.28479
0170	0	AFR	-19.4726	12.756	1	129	2.81549	0.905	0.00420367	3.28923
0171	0	AFR	-20.1971	13.1818	1	136	2.65243	0.937	0.0039205	2.99876
0172	1	AFR	-20.4902	13.2665	0	NaN	2.8357	0.943	0.00439636	2.98423
0173	0	AFR	-20.9179	13.4562	1	131	2.60312	0.9605	0.0041508	3.13454
0174	0	AFR	-21.1886	13.6267	1	135	2.60312	0.975	0.00332137	3.19731
0175	0	AFR	-22.0945	14.2562	1	133	2.61828	1.038	0.00221928	3.48352
0176	0	AFR	-22.6901	14.524	1	134	2.85884	1.038	0.00246798	3.33779
0177	0	AFR	-23.0553	14.4475	1	132	3.00671	1.027	0.00303871	3.24369
0178	0	AFR	-28.6338	16.4533	1	171	3.24079	1.2205	0.00223061	2.71166
0179	0	AFR	-28.9788	16.7202	1	165	3.24079	1.227	0.00514799	2.90505
0180	0	AFR	-29.6776	17.0512	1	157	3.33467	1.225	0.00549104	3.0883
0181	0	AFR	-30.2625	17.2599	1	174	3.50395	1.21	0.00635857	3.21696
0182	0	AFR	-30.8476	17.5756	1	163	3.44263	1.207	0.00575528	2.86085
0183	0	AFR	-31.7009	18.1879	1	170	3.04127	1.2135	0.00447345	2.77162
0184	0	AFR	-32.3127	18.3379	1	184	2.47281	1.209	0.00332143	2.76905
0185	0	AFR	-32.7695	18.1441	1	164	2.47281	1.1785	0.00145296	2.40387
0186	0	AFR	-34.3418	18.9928	0	NaN	3.93402	1.15	0.00383213	2.71335
0187	0	AFR	-34.4182	19.3796	0	NaN	3.93402	1.176	0.00271089	2.74645
0188	0	AFR	-34.7154	20.1201	0	NaN	4.07059	1.431	0.00266132	3.17932
0189	0	AFR	-34.5092	20.4496	0	NaN	3.92453	1.508	0.00286194	3.11472
0190	0	AFR	-34.408	20.8515	1	156	2.46012	1.509	0.003846	2.96945
0191	0	AFR	-34.3656	21.0002	0	NaN	2.46012	1.508	0.0036413	2.96945
0192	0	AFR	-34.3793	21.424	0	NaN	3.05901	1.454	0.00350761	2.84495
0193	0	AFR	-34.3452	21.8867	1	160	3.29845	1.4165	0.00371209	2.68299
0194	0	AFR	-34.1162	22.1251	0	NaN	3.29845	1.396	0.0031874	2.79934
0195	0	AFR	-34.0927	22.1488	0	NaN	3.29845	1.396	0.00314648	2.79934
0196	0	AFR	-34.0577	22.2396	0	NaN	3.29845	1.396	0.00339197	2.79934
0197	0	AFR	-33.9969	22.5805	0	NaN	3.41668	1.371	0.00331581	2.66517
0198	0	AFR	-34.0334	22.7949	0	NaN	3.57433	1.349	0.00350672	2.66517
0199	0	AFR	-34.0785	22.9502	0	NaN	3.57433	1.3265	0.00435649	2.55353
0200	0	AFR	-34.0818	23.0601	0	NaN	3.57433	1.3265	0.0042973	2.55353
0201	0	AFR	-34.0421	23.3846	1	167	3.69593	1.309	0.00497132	2.55769
0202	0	AFR	-34.1432	24.844	1	168	3.94888	1.252	0.00498982	2.93449
0203	0	AFR	-34.0871	24.9112	0	NaN	3.94888	1.252	0.00415265	2.93449
0204	0	AFR	-33.97	25.0413	1	159	2.57989	1.2515	0.00318659	3.06162
0205	0	AFR	-33.9711	25.2219	0	NaN	2.57989	1.257	0.0039997	3.06162
0206	0	AFR	-33.8656	25.6329	0	NaN	2.57989	1.248	0.00197281	2.94154
0207	0	AFR	-33.7215	25.8532	1	172	3.22403	1.25	0.0024744	3.17362
0208	0	AFR	-33.6954	26.6631	0	NaN	3.51516	1.243	0.00463321	3.59863
0209	0	AFR	-33.6832	26.6855	0	NaN	3.51516	1.244	0.00440425	3.59863
0210	0	AFR	-33.6031	26.9009	0	NaN	3.70338	1.246	0.00411164	3.72653
0211	0	AFR	-33.5417	27.0475	0	NaN	2.72401	1.2475	0.00436708	3.72653
0212	0	AFR	-33.4945	27.1375	1	161	2.72401	1.248	0.0039864	3.65744
0213	0	AFR	-33.4387	27.2326	0	NaN	2.72401	1.248	0.00521152	3.63961
0214	0	AFR	-33.4237	27.2597	0	NaN	2.72401	1.248	0.00524734	3.63961
0215	0	AFR	-33.4141	27.2754	0	NaN	2.72401	1.248	0.00506359	3.63961
0216	0	AFR	-33.3839	27.3257	0	NaN	2.72401	1.248	0.00490922	3.63961
0217	0	AFR	-33.3637	27.3581	0	NaN	2.72401	1.249	0.00537988	3.63961
0218	0	AFR	-33.2823	27.4903	1	166	2.72401	1.249	0.00425281	3.63961
0219	0	AFR	-33.2492	27.5427	0	NaN	2.72401	1.2495	0.0046239	3.75139
0220	0	AFR	-33.2264	27.5833	0	NaN	2.72401	1.2505	0.00446348	3.75139
0221	0	AFR	-33.0282	27.9157	0	NaN	2.44481	1.259	0.00480211	3.6533
0222	0	AFR	-32.9862	27.9522	0	NaN	2.44481	1.259	0.00449831	3.6533
0223	0	AFR	-32.975	27.9669	0	NaN	2.44481	1.259	0.00463177	3.94219
0224	0	AFR	-32.936	28.0335	0	NaN	2.44481	1.261	0.00466154	3.94219
0225	0	AFR	-32.9071	28.0776	0	NaN	2.44481	1.262	0.00476315	3.94219
0226	0	AFR	-32.8002	28.1516	0	NaN	2.44481	1.264	0.00480989	3.94219
0227	0	AFR	-32.7264	28.3087	0	NaN	3.16935	1.2665	0.00473335	4.05367
0228	0	AFR	-32.6811	28.3876	1	162	3.16935	1.271	0.00570055	4.05367
0229	0	AFR	-32.6079	28.4911	0	NaN	3.16935	1.272	0.00648985	4.05367
0230	0	AFR	-32.5852	28.5253	0	NaN	3.16935	1.2725	0.00629392	4.05367
0231	0	AFR	-32.4487	28.6745	0	NaN	2.60439	1.279	0.00775311	3.80179
0232	0	AFR	-32.4035	28.7269	0	NaN	2.60439	1.279	0.00914678	3.80179
0233	0	AFR	-32.3403	28.7899	0	NaN	2.60439	1.2795	0.00923902	3.80179
0234	0	AFR	-32.2528	28.9044	1	155	2.60439	1.286	0.0123388	3.48279
0235	0	AFR	-32.1585	28.9968	0	NaN	2.60439	1.288	0.0153974	3.11502
0236	0	AFR	-32.083	29.0765	0	NaN	2.60439	1.291	0.0144302	3.11502
0237	0	AFR	-31.9514	29.187	0	NaN	2.48882	1.294	0.0127389	3.1803
0238	0	AFR	-31.932	29.2171	0	NaN	2.48882	1.296	0.0153907	3.1803
0239	0	AFR	-31.8611	29.271	0	NaN	2.48882	1.296	0.0135808	3.1803
0240	0	AFR	-31.8101	29.3266	0	NaN	2.48882	1.299	0.0168123	2.97264
0241	0	AFR	-31.7504	29.3728	0	NaN	2.48882	1.3	0.0212668	2.97264
0242	0	AFR	-31.6923	29.4235	0	NaN	2.48882	1.3	0.0256402	2.97264
0243	0	AFR	-31.6777	29.4588	0	NaN	2.48882	1.302	0.0284914	2.97264
0244	0	AFR	-31.6307	29.5525	1	183	2.48882	1.302	0.044196	2.97264
0245	0	AFR	-31.5647	29.6368	0	NaN	2.48637	1.305	0.0426235	2.76853
0246	0	AFR	-31.5238	29.6887	0	NaN	2.48637	1.307	0.0478811	2.76853
0247	0	AFR	-31.321	29.9675	0	NaN	2.48637	1.316	0.059681	2.71469
0248	0	AFR	-31.2486	30.0472	0	NaN	2.48637	1.32	0.0552852	2.62227
0249	0	AFR	-31.2221	30.0693	0	NaN	2.48637	1.32	0.0558827	2.62227
0250	0	AFR	-31.1524	30.1342	0	NaN	2.48637	1.325	0.0512607	2.62227
0251	0	AFR	-31.1085	30.1741	0	NaN	2.49941	1.3285	0.0546193	2.62227
0252	0	AFR	-31.0819	30.1961	1	180	2.49941	1.3285	0.0599554	2.62227
0253	0	AFR	-30.9735	30.2857	0	NaN	2.49941	1.333	0.0500426	2.41898
0254	0	AFR	-30.91	30.3347	0	NaN	2.49941	1.337	0.0430992	2.41898
0255	0	AFR	-30.7387	30.4596	1	182	2.49941	1.341	0.0374593	2.41898
0256	0	AFR	-30.7095	30.4819	0	NaN	2.49941	1.3425	0.0325796	2.33144
0257	0	AFR	-30.6134	30.5482	0	NaN	2.49941	1.343	0.0263827	2.33144
0258	0	AFR	-30.4854	30.6353	0	NaN	2.68532	1.3515	0.0174474	2.81233
0259	0	AFR	-30.2015	30.8031	1	179	2.13131	1.362	0.0106993	3.15615
0260	0	AFR	-30.1139	30.8545	0	NaN	2.13131	1.364	0.0113831	3.15615
0261	0	AFR	-29.8118	31.0414	0	NaN	2.13131	1.378	0.00981066	3.21469
0262	0	AFR	-29.6503	31.1298	0	NaN	2.13131	1.388	0.00372835	3.3923
0263	0	AFR	-29.4617	31.2773	0	NaN	2.27106	1.408	0.003397	3.30038
0264	0	AFR	-29.3152	31.4112	0	NaN	2.27106	1.421	0.0029486	3.30038
0265	0	AFR	-29.2802	31.4432	0	NaN	2.27106	1.427	0.0027669	3.30038
0266	0	AFR	-29.226	31.5029	1	175	2.27106	1.435	0.00249876	3.34248
0267	0	AFR	-29.1148	31.618	1	169	2.36573	1.4425	0.00201568	3.34248
0268	0	AFR	-28.9463	31.818	0	NaN	2.36573	1.452	0.0014444	3.49516
0269	0	AFR	-28.8475	32.0525	1	178	2.36573	1.4595	0.00244589	3.49516
0270	0	AFR	-26.1755	32.696	1	116	1.99116	1.6895	0.00034342	3.59733
0271	0	AFR	-25.9951	32.484	1	127	1.99116	1.717	0.000412018	3.76776
0272	1	AFR	-25.8719	32.7341	1	110	1.99116	1.713	0.000394547	3.76776
0273	0	AFR	-25.2102	33.5132	1	113	2.34279	1.725	0.00712548	3.59074
0274	1	AFR	-20.8842	35.0844	1	126	1.0549	2.7855	0.00107006	4.74837
0275	0	AFR	-20.5003	34.7262	1	109	1.0549	3.341	0.00059209	10.3263
0276	1	AFR	-19.8858	34.7604	1	108	1.14964	3.553	0.000917994	7.67607
0277	1	AFR	-19.7985	34.8142	1	124	1.14964	3.538	0.000813522	7.15159
0278	0	AFR	-19.6915	35.1296	0	NaN	1.14964	3.3555	0.000820177	5.9317
0279	0	AFR	-19.5255	35.324	0	NaN	1.39599	3.152	0.000751377	5.32101
0280	0	AFR	-19.5092	35.3457	0	NaN	1.39599	3.14	0.000751786	5.32101
0281	0	AFR	-19.4249	35.4269	0	NaN	1.39599	3.109	0.000779033	5.32101
0282	0	AFR	-19.373	35.4592	0	NaN	1.39599	3.078	0.000754509	5.32101
0283	0	AFR	-19.1318	35.6925	0	NaN	1.69676	2.804	0.00118977	4.86422
0284	1	AFR	-18.5796	36.4908	2	114, 128	1.89127	2.503	0.00110772	4.54428
0285	0	AFR	-17.7684	37.2056	0	NaN	0.780992	2.499	0.000694228	4.03217
0286	1	AFR	-17.6813	37.3341	1	111	1.89365	2.498	0.000904371	3.90621
0287	0	AFR	-17.5435	37.5942	0	NaN	1.78057	2.503	0.00129273	3.72482
0288	0	AFR	-17.4557	37.7555	0	NaN	1.78057	2.504	0.00121785	3.74247
0289	1	AFR	-17.1112	38.5977	1	120	2.03304	2.531	0.00130817	3.74145
0290	0	AFR	-17.0638	38.818	1	121	1.64122	2.542	0.000932412	3.67038
0291	0	AFR	-16.8982	39.141	1	112	1.64122	2.565	0.00114317	3.87719
0292	0	AFR	-16.5299	39.7124	0	NaN	1.96863	2.6375	0.00257039	3.7911
0293	1	AFR	-16.4301	39.8774	1	118	1.96863	2.65	0.00685027	3.81917
0294	0	AFR	-15.8489	40.244	0	NaN	2.0257	2.6945	0.000636785	4.06362
0295	0	AFR	-15.5746	40.4895	0	NaN	2.0257	2.74	0.00774327	3.89253
0296	0	AFR	-15.1756	40.5119	0	NaN	1.81192	2.763	0.00128151	3.65314
0297	1	AFR	-15.1407	40.5765	1	122	1.81192	2.765	0.00416337	3.65314
0298	1	AFR	-14.3539	40.6384	0	NaN	1.50302	2.798	0.00788761	3.90594
0299	0	AFR	-14.1712	40.5267	1	117	1.45797	2.799	0.00756207	3.99599
0300	1	AFR	-14.1566	40.5384	0	NaN	1.45797	2.8	0.0122502	3.99599
0301	0	AFR	-13.512	40.5269	1	115	1.50476	2.8095	0.0275188	3.84164
0302	0	AFR	-13.4816	40.5322	0	NaN	1.50476	2.8095	0.0276439	3.84164
0303	1	AFR	-12.5226	40.4954	1	123	1.60754	2.815	0.00653593	3.75713
0304	1	AFR	-11.6942	40.4398	1	119	1.15703	2.8155	0.00131686	4.33413
0305	0	AFR	-11.3328	40.365	0	NaN	1.15703	2.813	0.000140046	4.26482
0306	1	AFR	-10.4709	40.4386	1	125	1.50005	2.795	0.0132411	3.71074
0307	0	AFR	-9.4857	39.6607	1	187	1.63864	2.798	0.0317939	3.54957
0308	0	AFR	-8.71493	39.3751	1	186	1.484	2.806	0.00168819	3.80629
0309	1	AFR	-7.76479	39.3594	1	189	1.04055	2.8235	0.000680991	4.17647
0310	0	AFR	-7.41291	39.341	0	NaN	1.14371	2.817	0.000546017	4.30437
0311	0	AFR	-7.18366	39.4487	0	NaN	1.71663	2.815	0.00306454	4.37484
0312	0	AFR	-6.37781	38.8667	1	190	0.224354	3.192	0.000134636	4.25294
0313	1	AFR	-6.11635	38.818	1	191	0.224354	3.192	0.000310071	4.07242
0314	0	AFR	-5.4327	38.9857	1	188	1.04063	2.9465	0.0057396	3.47263
0315	1	AFR	-4.05883	39.5883	0	NaN	2.10231	2.779	0.0103273	3.24986
0316	0	AFR	-3.95737	39.765	0	NaN	2.10231	2.77	0.0215997	3.18385
0317	0	AFR	-3.16976	40.1435	1	66	2.08351	2.737	0.00761184	3.22929
0318	1	AFR	-2.53946	40.5349	1	67	2.21144	2.7005	0.00367311	3.26085
0319	0	AFR	-1.2296	41.853	0	NaN	2.29943	2.557	0.0181548	3.01811
0320	0	AFR	-1.02909	41.9817	0	NaN	2.29943	2.545	0.0126751	3.01811
0321	0	AFR	-0.853785	42.1087	0	NaN	2.35735	2.534	0.00929466	2.97703
0322	0	AFR	-0.24664	42.6395	1	153	2.21293	2.475	0.00978878	3.05991
0323	1	AFR	7.96244	49.8503	1	154	2.23443	1.606	0.00194217	3.557
0324	1	AFR	9.6028	50.8077	1	152	2.64356	1.559	0.00277563	3.7258
0325	0	AFR	9.75136	50.8325	0	NaN	2.57221	1.557	0.00189214	3.973
0326	0	AFR	9.85821	50.8524	0	NaN	2.57221	1.5575	0.00209231	3.973
0327	1	AFR	10.4309	51.0376	1	151	2.57221	1.566	0.00151871	4.18638
0328	1	AFR	10.6613	51.1466	0	NaN	3.06582	1.577	0.00175279	4.14393
0329	1	AFR	10.8906	51.122	0	NaN	2.8039	1.585	0.0032323	4.17935
0330	1	AFR	10.9997	51.1246	0	NaN	2.8039	1.592	0.00402503	4.13139
0331	0	AFR	11.2814	51.0797	0	NaN	2.80043	1.6095	0.00266455	4.03881
0332	0	AFR	11.505	51.1278	0	NaN	2.80043	1.64	0.00269925	3.91791
0333	0	AFR	11.9412	50.8985	0	NaN	1.18784	1.978	0.00982708	3.52204
0334	0	AFR	11.9511	50.8498	0	NaN	1.18784	2.0015	0.0128376	3.52204
0335	1	AFR	11.9718	50.819	0	NaN	1.18784	2.022	0.0152151	3.52204
0336	0	AFR	11.7946	50.5221	0	NaN	0.929824	2.1365	0.0193811	3.56778
0337	0	AFR	11.5055	49.9221	0	NaN	0.763654	2.201	0.0319808	3.37504
0338	0	MAD	-14.144	50.1565	1	75	2.59137	1.051	0.0423967	4.6655
0339	0	MAD	-13.4855	50.0207	0	NaN	2.70089	1.189	0.0473255	4.44786
0340	0	MAD	-13.4566	50.0158	0	NaN	2.41639	1.196	0.0435759	4.44786
0341	0	MAD	-13.2047	49.9221	0	NaN	2.41639	1.241	0.0490299	4.36318
0342	0	MAD	-12.9373	49.8387	0	NaN	2.41639	1.3035	0.00717022	4.22054
0343	1	MAD	-12.3568	48.9626	0	NaN	1.43283	1.971	0.00114414	4.22288
0344	0	MAD	-12.7966	48.9281	0	NaN	0.567529	2.343	0.000639624	4.27858
0345	1	MAD	-12.9916	48.8839	0	NaN	0.567529	2.675	0.000843557	4.31469
0346	1	MAD	-13.3074	48.7912	0	NaN	0.567529	3.147	0.00195468	4.053
0347	1	MAD	-13.7057	48.3109	1	93	0.575165	2.7555	0.00157437	3.74569
0348	1	MAD	-13.9397	47.9561	0	NaN	0.575165	2.665	0.000486187	3.46154
0349	0	MAD	-14.0666	48.0189	0	NaN	0.740797	2.6905	0.00033215	3.33506
0350	1	MAD	-14.2339	47.9961	0	NaN	0.740797	2.6905	0.000312604	3.33506
0351	0	MAD	-14.3311	47.9815	0	NaN	0.64138	2.702	0.000430152	NaN
0352	0	MAD	-14.6909	47.9927	0	NaN	0.64138	2.702	0.000482308	NaN
0353	1	MAD	-14.839	47.6107	0	NaN	0.210789	2.707	0.000478606	3.36261
0354	1	MAD	-15.0563	47.1894	0	NaN	0.714948	2.726	0.000902598	3.60561
0355	1	MAD	-15.4392	47.1331	1	94	0.714948	2.738	0.000446125	3.82081
0356	1	MAD	-15.4715	47.0523	1	80	0.714948	2.764	0.000310079	3.82081
0357	1	MAD	-15.5089	46.4997	0	NaN	0.601688	2.749	0.00113718	3.88652
0358	1	MAD	-15.7283	46.3292	0	NaN	0.601688	2.7675	0.000298555	3.93159
0359	1	MAD	-15.8419	46.3475	1	77	0.601688	2.765	0.000199297	3.96165
0360	1	MAD	-15.7977	45.7696	1	81	0.835035	2.774	0.000527508	3.7358
0361	1	MAD	-16.2021	44.847	0	NaN	0.739673	2.8105	0.000761028	4.15893
0362	1	MAD	-16.6041	44.4263	0	NaN	1.14075	2.9115	0.000592338	5.55387
0363	1	MAD	-17.1444	44.1081	0	NaN	0.93744	3.018	0.000652115	6.06783
0364	1	MAD	-17.7042	43.9583	1	82	0.471682	2.85	0.00091609	4.69354
0365	1	MAD	-18.2263	44.0394	0	NaN	0.471682	2.7405	0.000313965	3.05895
0366	0	MAD	-18.6935	44.2069	0	NaN	1.16705	2.674	0.00122245	2.76532
0367	1	MAD	-19.1681	44.2748	1	83	1.63177	2.651	0.00110213	3.07264
0368	1	MAD	-19.6349	44.391	1	95	1.70309	2.6235	0.000422438	3.63156
0369	1	MAD	-20.3321	44.2452	1	91	1.07158	2.5835	0.00129635	3.29382
0370	1	MAD	-20.4772	44.122	0	NaN	1.07158	2.5625	0.00120041	3.29382
0371	1	MAD	-20.755	43.9631	0	NaN	1.07158	2.545	0.0012672	3.17429
0372	1	MAD	-21.0561	43.8536	0	NaN	1.61793	2.524	0.000843594	3.25771
0373	1	MAD	-21.4168	43.4501	1	88	1.26669	2.457	0.00559032	3.2854
0374	0	MAD	-22.9723	43.4639	0	NaN	2.74116	1.972	0.0379122	3.77854
0375	1	MAD	-23.3182	43.6191	1	76	2.65214	1.947	0.0458721	3.89554
0376	0	MAD	-23.5678	43.7555	1	92	2.65214	1.93	0.0209094	3.87277
0377	1	MAD	-25.0248	44.0636	1	79	2.91561	1.599	0.0539613	3.66199
0378	1	MAD	-25.2901	44.5218	1	90	2.92012	1.505	0.00156473	3.39526
0379	1	MAD	-25.4562	45.7242	0	NaN	2.80468	0.714	0.00295128	3.8372
0380	1	MAD	-25.1749	46.4359	1	87	3.12242	0.549	0.00532176	4.07515
0381	1	MAD	-25.0422	46.9102	0	NaN	2.51836	0.4	0.00249621	3.64966
0382	1	MAD	-24.8705	47.1069	0	NaN	2.51836	0.387	0.00258007	3.8757
0383	0	MAD	-24.717	47.1945	0	NaN	2.51836	0.387	0.00253386	4.02837
0384	0	MAD	-24.6325	47.237	0	NaN	2.66908	0.3865	0.00230407	4.02837
0385	0	MAD	-24.534	47.2833	0	NaN	2.66908	0.386	0.00313155	4.11613
0386	0	MAD	-24.3858	47.3185	0	NaN	2.66908	0.3865	0.00251096	4.11613
0387	1	MAD	-24.287	47.3548	0	NaN	2.66908	0.387	0.00235254	4.15994
0388	0	MAD	-24.1823	47.4004	0	NaN	2.35066	0.388	0.00374523	4.15994
0389	0	MAD	-24.046	47.4734	0	NaN	2.35066	0.389	0.0141995	4.15994
0390	0	MAD	-23.808	47.5801	0	NaN	2.35066	0.395	0.0307468	4.10018
0391	1	MAD	-23.6015	47.5941	0	NaN	2.35066	0.401	0.0138115	4.10018
0392	0	MAD	-23.3353	47.7058	1	85	2.59987	0.408	0.0155125	4.12604
0393	0	MAD	-23.2207	47.7418	0	NaN	2.42506	0.41	0.013983	4.32855
0394	0	MAD	-23.1117	47.7611	0	NaN	2.42506	0.41	0.00742859	4.32855
0395	0	MAD	-22.8239	47.8402	0	NaN	2.42506	0.417	0.0180589	4.45764
0396	0	MAD	-22.5369	47.8849	0	NaN	2.27671	0.424	0.0137233	4.61301
0397	0	MAD	-22.4243	47.9152	1	84	2.27671	0.424	0.00810469	4.61301
0398	0	MAD	-22.1395	48.0251	0	NaN	2.27671	0.4305	0.002958	4.65407
0399	0	MAD	-22.0305	48.0725	0	NaN	2.46429	0.435	0.00201152	4.66516
0400	0	MAD	-21.8016	48.1685	0	NaN	2.46429	0.4395	0.00485263	4.66516
0401	0	MAD	-21.6533	48.2242	0	NaN	2.33629	0.4415	0.010069	4.77197
0402	1	MAD	-21.558	48.2381	0	NaN	2.33629	0.443	0.00881284	4.77197
0403	0	MAD	-21.3931	48.2736	0	NaN	2.33629	0.447	0.00355809	4.76562
0404	0	MAD	-21.3124	48.3334	0	NaN	2.33629	0.451	0.015533	4.70389
0405	0	MAD	-21.2547	48.345	1	86	2.33629	0.452	0.0184185	4.70389
0406	0	MAD	-20.9723	48.4327	0	NaN	2.21562	0.458	0.0181372	4.70389
0407	0	MAD	-20.8424	48.4766	0	NaN	2.21562	0.462	0.024826	4.6577
0408	0	MAD	-20.5521	48.5534	0	NaN	2.39039	0.47	0.0242975	4.40552
0409	0	MAD	-20.4184	48.5975	0	NaN	2.39039	0.475	0.0293192	4.40552
0410	1	MAD	-20.2931	48.6475	0	NaN	2.39039	0.4785	0.0327384	4.38443
0411	1	MAD	-20.0053	48.7871	1	89	2.30393	0.486	0.0293161	4.45669
0412	0	MAD	-19.6053	48.8705	0	NaN	2.2268	0.502	0.00135031	4.43002
0413	0	MAD	-19.4425	48.9387	0	NaN	2.2268	0.508	0.00114324	4.40717
0414	0	MAD	-18.9815	49.103	0	NaN	2.45405	0.521	0.00679406	4.53278
0415	1	MAD	-18.2696	49.3672	1	78	2.34944	0.57	0.00598688	4.71326
0416	0	MAD	-18.0755	49.4056	0	NaN	2.23935	0.581	0.00308357	4.71326
0417	0	MAD	-17.8636	49.4682	0	NaN	2.23935	0.586	0.00226377	4.77512
0418	1	MAD	-17.7621	49.5021	0	NaN	2.23935	0.5985	0.00234833	4.70119
0419	0	MAD	-17.6413	49.4898	0	NaN	1.94785	0.6065	0.00238633	4.70119
0420	0	MAD	-17.5715	49.4766	0	NaN	1.94785	0.614	0.00209817	4.70119
0421	0	MAD	-17.4565	49.4501	0	NaN	1.94785	0.617	0.00156876	4.8269
0422	0	MAD	-17.364	49.4105	0	NaN	1.94785	0.628	0.00118698	4.8269
0423	0	MAD	-17.2056	49.465	0	NaN	1.94785	0.6355	0.00151705	4.57394
0424	0	MAD	-17.0946	49.5182	0	NaN	1.94785	0.637	0.00166433	4.57394
0425	1	MAD	-16.8742	49.6703	0	NaN	2.24991	0.661	0.00164449	4.2033
0426	0	MAD	-16.619	49.8023	0	NaN	2.02977	0.7155	0.00189912	3.64934
0427	0	MAD	-16.5409	49.8412	0	NaN	2.02977	0.727	0.00250553	3.1626
0428	0	MAD	-16.4211	49.8279	0	NaN	2.02977	0.737	0.00271907	3.1626
0429	0	MAD	-16.1593	49.7515	0	NaN	1.71436	0.757	0.00240697	2.50151
0430	0	MAD	-16.1077	49.7008	0	NaN	1.71436	0.757	0.00257055	2.50151
0431	0	MAD	-15.9917	49.6865	0	NaN	1.71436	0.76	0.00271146	2.31458
0432	0	MAD	-15.8955	49.716	0	NaN	1.71436	0.7615	0.00276154	2.31458
0433	0	MAD	-15.8244	49.6896	0	NaN	1.71436	0.763	0.00263208	2.31458
0434	0	MAD	-15.6954	49.6404	0	NaN	1.71436	0.763	0.00198201	2.35285
0435	0	MAD	-15.5568	49.6157	0	NaN	1.71436	0.772	0.00116203	2.35285
0436	1	MAD	-15.454	49.7624	0	NaN	1.71436	0.799	0.00169373	2.82425
0437	1	MAD	-15.4362	49.8947	0	NaN	1.71436	0.822	0.00128484	2.82425
0438	1	MAD	-15.6233	49.9566	0	NaN	1.71436	0.772	0.0022991	2.63121
0439	0	MAD	-15.9436	50.1447	0	NaN	1.71436	0.761	0.00308918	3.03633
0440	0	MAD	-15.8287	50.3121	0	NaN	2.55879	0.763	0.0121982	3.03633
0441	0	MAD	-15.6928	50.3596	0	NaN	2.45277	0.786	0.0144306	3.41136
0442	0	MAD	-15.644	50.3853	0	NaN	2.45277	0.793	0.0136247	3.41136
0443	0	MAD	-15.588	50.4065	0	NaN	2.45277	0.8065	0.0166353	3.41136
0444	1	MAD	-15.4621	50.4583	0	NaN	2.45277	0.83	0.0128989	3.47434
0445	1	MAD	-15.2259	50.4652	0	NaN	2.29693	0.883	0.0154044	3.65532
0446	0	MAD	-15.0091	50.3306	0	NaN	2.29693	0.9245	0.0246277	3.92617
0447	0	MAD	-14.8723	50.266	0	NaN	2.29693	0.959	0.0210936	3.92617
0448	0	MAD	-14.4141	50.1802	0	NaN	2.4652	1.0155	0.0294485	4.42986
0449	0	MAD	-14.2533	50.152	0	NaN	2.4652	1.0405	0.0297625	4.6655
0450	1	AUS	-33.3153	115.68	0	NaN	3.2542	0.988	0.000671805	4.01486
0451	1	AUS	-33.301	115.692	0	NaN	3.2542	0.987	0.000627294	4.01486
0452	1	AUS	-32.5779	115.762	0	NaN	3.15153	0.939	0.000817987	4.39051
0453	0	AUS	-31.9648	115.844	1	1189	3.05993	0.915	0.000387447	4.76297
0454	0	AUS	-28.8654	114.635	1	1149	3.20901	0.942	0.000990413	4.87566
0455	0	AUS	-27.7075	114.158	1	1171	3.14068	0.969	0.0023351	5.1394
0456	1	AUS	-25.8673	114.238	1	1197	0.444787	0.977	0.000100335	4.70794
0457	1	AUS	-24.8776	113.617	1	1146	0.976463	1.28	0.000305775	4.57176
0458	1	AUS	-21.6864	114.918	1	1121	0.871572	2.01	0.00111996	4.70337
0459	1	AUS	-21.5469	115.381	0	NaN	0.871572	2.466	0.00128386	4.80223
0460	1	AUS	-21.3128	115.676	0	NaN	0.97918	2.658	0.00142198	4.61414
0461	1	AUS	-20.9998	116.101	1	1145	0.687523	2.905	0.00081082	4.56817
0462	0	AUS	-20.8264	116.442	0	NaN	0.854988	3.102	9.86476e-05	4.38496
0463	1	AUS	-20.7756	116.515	0	NaN	0.854988	3.133	0.00011633	4.51116
0464	0	AUS	-20.713	116.925	0	NaN	0.694434	3.5375	0.000393332	4.28364
0465	1	AUS	-20.6789	117.193	0	NaN	0.694434	3.787	0.000241222	4.13828
0466	1	AUS	-20.7361	117.351	0	NaN	0.74754	3.994	0.000200258	4.07707
0467	1	AUS	-20.6875	117.583	0	NaN	0.74754	4.1505	0.000337976	4.09726
0468	1	AUS	-20.6033	117.859	0	NaN	0.74754	4.297	0.000235993	4.23939
0469	1	AUS	-20.395	118.101	1	1198	1.2333	4.482	0.00046999	5.12381
0470	1	AUS	-20.3417	118.486	0	NaN	0.995089	4.8385	0.000241646	5.4673
0471	0	AUS	-20.3011	118.73	0	NaN	0.995089	5.007	0.000119002	5.57953
0472	1	AUS	-20.2734	118.826	0	NaN	0.579539	5.0555	0.000103193	5.41079
0473	1	AUS	-19.9696	119.157	1	1136	0.579539	5.5175	0.000256524	4.83482
0474	0	AUS	-20.0743	119.573	0	NaN	0.67038	6.153	0.000329241	3.95351
0475	0	AUS	-17.5117	123.592	1	1195	0.310027	3.632	9.03066e-05	5.34663
0476	0	AUS	-17.1983	123.888	1	1168	0.310027	3.5425	0.000102276	5.16611
0477	0	AUS	-16.897	123.862	0	NaN	0.310027	3.632	0.000120833	5.09914
0478	0	AUS	-16.4877	124.429	0	NaN	0.549986	6.5415	0.000183695	4.55556
0479	0	AUS	-16.3878	124.68	1	1155	NaN	6.906	8.39012e-05	3.81107
0480	1	AUS	-14.2021	126.594	1	1160	0.294042	3.4885	8.88465e-05	4.16597
0481	1	AUS	-13.941	126.833	1	1138	0.294042	3.13	9.93943e-05	4.64552
0482	0	AUS	-15.3092	128.065	0	NaN	NaN	6.145	0.000420094	3.36243
0483	1	AUS	-15.5616	127.946	1	1177	NaN	6.457	0.000347179	NaN
0484	1	AUS	-15.2454	128.226	1	1175	NaN	6.0845	0.000222589	3.36243
0485	0	AUS	-15.1378	129.196	1	1159	0.766902	7.3025	0.000218761	6.74806
0486	0	AUS	-15.1236	129.653	1	1192	NaN	7.981	0.000127393	3.57776
0487	0	AUS	-14.7944	129.863	1	1143	NaN	7.745	0.000295967	3.10156
0488	0	AUS	-13.973	129.744	1	1170	0.799807	6.151	0.000382015	7.07589
0489	0	AUS	-13.3117	130.247	1	1135	0.851176	5.999	0.000205441	10.751
0490	0	AUS	-12.8885	130.336	1	1142	0.851176	5.3545	0.000353172	9.38627
0491	0	AUS	-12.2226	131.238	1	1118	0.380809	3.778	0.000165639	-2.08518
0492	1	AUS	-12.268	131.775	1	1166	0.414054	3.648	0.000221578	-12.4506
0493	0	AUS	-12.3024	132.066	1	1196	0.414054	3.623	0.000327174	-11.2116
0494	0	AUS	-12.2201	132.283	0	NaN	0.414054	3.648	0.000299513	-11.2116
0495	0	AUS	-12.2142	132.397	1	1185	0.414054	3.648	0.000139331	-7.90934
0496	0	AUS	-12.0854	132.603	1	1139	0.414054	3.4995	7.76874e-05	-4.01517
0497	0	AUS	-12.0712	134.187	1	1163	0.558805	3.145	0.000202602	5.09445
0498	0	AUS	-12.054	134.589	0	NaN	0.558805	3.361	0.000293003	5.42749
0499	0	AUS	-14.7552	135.4	1	1180	0.352667	1.789	0.000139885	5.55226
0500	0	AUS	-14.909	135.433	0	NaN	0.352667	1.7955	0.000110351	5.4924
0501	1	AUS	-15.1095	135.724	1	1133	0.352667	1.7865	0.000162525	5.18446
0502	1	AUS	-15.3968	136.213	0	NaN	0.274661	1.781	0.000100207	4.78231
0503	1	AUS	-15.8098	136.679	1	1167	0.274661	1.922	9.61422e-05	4.93255
0504	1	AUS	-15.9099	136.863	0	NaN	0.339729	1.9645	8.90135e-05	5.13809
0505	1	AUS	-16.0298	137.268	0	NaN	0.355479	2.106	9.74899e-05	5.33898
0506	1	AUS	-16.2597	137.747	0	NaN	0.306565	2.235	0.000122236	5.21598
0507	1	AUS	-16.6742	138.159	0	NaN	0.306565	2.393	0.000139321	4.83096
0508	1	AUS	-16.7809	138.533	0	NaN	0.465154	2.514	9.72842e-05	5.0914
0509	1	AUS	-17.2994	139.219	0	NaN	0.294532	3.51	0.00023759	5.17695
0510	1	AUS	-17.5043	139.606	0	NaN	0.304528	3.696	0.000221093	4.96436
0511	1	AUS	-17.5734	139.799	2	1119, 1162	0.304528	3.698	0.000201951	4.9099
0512	1	AUS	-17.8629	140.216	0	NaN	0.304528	3.775	0.000419742	NaN
0513	1	AUS	-17.9316	140.404	0	NaN	0.28791	3.775	0.000423721	NaN
0514	1	AUS	-17.9032	140.471	0	NaN	0.28791	3.775	0.000380286	NaN
0515	1	AUS	-17.5101	140.731	1	1144	0.28791	3.679	0.000107651	5.57536
0516	1	AUS	-16.5538	141.268	2	1147, 1173	0.512247	2.915	0.000162701	5.33103
0517	1	AUS	-16.3956	141.294	1	1186	0.512247	2.652	0.000203945	5.21878
0518	1	AUS	-15.199	141.587	2	1132, 1169	0.47302	2.102	0.000180815	4.88368
0519	1	AUS	-14.1625	141.592	1	1153	0.455623	1.762	0.0001804	5.35198
0520	1	AUS	-13.3459	141.648	1	1120	0.441551	1.729	0.00015957	5.27027
0521	0	AUS	-12.5881	141.953	0	NaN	0.549965	2.4635	5.6157e-05	5.16218
0522	0	AUS	-12.0657	141.924	0	NaN	0.724246	3.097	8.01034e-05	6.23903
0523	0	AUS	-12.0481	142.023	0	NaN	0.724246	3.105	5.64682e-05	5.7704
0524	0	AUS	-11.665	142.022	0	NaN	0.410102	3.2085	0.000162147	6.73309
0525	0	AUS	-10.9161	142.212	1	1156	0.609941	3.448	0.000271059	7.7259
0526	1	AUS	-11.9135	142.957	0	NaN	0.575152	3.084	0.000276085	3.30412
0527	0	AUS	-12.1663	143.092	0	NaN	0.700035	2.889	0.000276219	3.27723
0528	0	AUS	-12.4956	143.273	1	1176	1.04434	2.347	0.000292901	3.61861
0529	1	AUS	-12.8379	143.359	0	NaN	1.04434	2.346	0.000272681	3.77326
0530	1	AUS	-12.8761	143.373	1	1164	1.04434	2.346	0.000263922	3.77326
0531	1	AUS	-13.5395	143.588	0	NaN	1.81035	2.341	0.000276952	3.40263
0532	1	AUS	-13.7028	143.545	0	NaN	1.81035	2.22	0.000285381	3.32695
0533	1	AUS	-14.0676	143.693	1	1187	0.736983	2.107	0.000285121	3.50149
0534	1	AUS	-14.4882	143.947	0	NaN	0.736983	2.054	0.000510134	3.51437
0535	0	AUS	-14.4	144.144	1	1174	0.736983	2.2935	0.000395679	3.47796
0536	0	AUS	-14.3805	144.168	0	NaN	0.736983	2.316	0.00040913	3.47796
0537	0	AUS	-14.658	144.922	1	1157	1.29649	2.343	0.000304336	2.9135
0538	1	AUS	-14.7824	145.02	0	NaN	1.29649	2.352	0.000326584	3.03768
0539	0	AUS	-15.1414	145.238	0	NaN	2.08705	2.3685	0.000744538	2.71991
0540	0	AUS	-15.4593	145.246	1	1141	2.18995	2.372	0.00101422	3.00904
0541	0	AUS	-15.5296	145.271	0	NaN	2.18995	2.3725	0.00104422	3.00904
0542	0	AUS	-15.922	145.364	0	NaN	1.91308	2.376	0.000758622	3.57099
0543	0	AUS	-16.2978	145.45	1	1134	1.91308	2.401	0.000877794	3.7898
0544	1	AUS	-16.8583	145.768	0	NaN	1.58575	2.527	0.000913639	3.81079
0545	0	AUS	-17.2239	145.97	0	NaN	1.58575	2.544	0.00100211	3.81004
0546	0	AUS	-17.507	146.069	0	NaN	1.96185	2.57	0.00106431	3.69234
0547	0	AUS	-17.71	146.109	0	NaN	1.96185	2.5715	0.00109544	3.88735
0548	1	AUS	-18.0313	146.052	1	1191	1.69653	2.846	0.000319191	4.33068
0549	1	AUS	-18.5043	146.274	1	1152	1.35468	3.0865	0.000717376	5.34281
0550	0	AUS	-18.929	146.323	1	1123	0.790786	3.0865	0.000290801	5.12611
0551	1	AUS	-19.1684	146.647	0	NaN	0.790786	3.0065	0.000325264	4.65046
0552	0	AUS	-19.2671	146.84	1	1181	1.40762	2.998	0.000301693	4.16223
0553	0	AUS	-19.402	147.129	1	1150	1.08735	2.96	0.000357299	4.23256
0554	1	AUS	-19.6378	147.594	1	1127	1.08735	2.9715	0.000737604	5.53496
0555	1	AUS	-19.8309	147.7	0	NaN	1.08735	2.975	0.000355917	5.88261
0556	1	AUS	-19.9494	148.143	0	NaN	1.12026	2.9215	0.000883748	6.11895
0557	1	AUS	-19.9636	148.224	0	NaN	1.12026	2.914	0.000891114	6.11895
0558	1	AUS	-20.1657	148.414	0	NaN	1.12026	2.865	0.000244008	5.57847
0559	0	AUS	-20.1629	148.43	0	NaN	1.12026	2.8635	0.000255688	5.57847
0560	0	AUS	-20.4617	148.786	0	NaN	0.706513	2.7555	0.00027125	4.60769
0561	0	AUS	-20.4842	148.722	1	1179	0.706513	2.7555	0.000267194	4.60769
0562	0	AUS	-20.5731	148.669	0	NaN	0.706513	2.755	0.000262364	3.86866
0563	0	AUS	-20.8694	148.851	0	NaN	0.706513	2.7545	0.000283509	1.15086
0564	1	AUS	-21.1493	149.221	0	NaN	1.04311	2.81	0.000303698	-1.22319
0565	0	AUS	-21.2696	149.207	0	NaN	0.568162	2.8505	0.000279122	-1.22319
0566	0	AUS	-21.3999	149.281	1	1178	0.568162	2.993	0.00028128	-1.06425
0567	0	AUS	-21.7297	149.457	0	NaN	0.568162	3.013	0.000267285	-1.47977
0568	0	AUS	-22.2768	149.609	0	NaN	0.697804	3.337	0.000264864	0.0668047
0569	0	AUS	-22.3471	149.669	0	NaN	0.697804	3.326	0.000288696	1.0433
0570	1	AUS	-22.3817	149.786	1	1188	0.697804	3.326	0.000264025	1.0433
0571	0	AUS	-22.6272	150.024	0	NaN	0.697804	3.3505	0.000228247	2.13008
0572	0	AUS	-22.9282	150.74	1	1194	1.36935	3.14	0.000775988	3.00967
0573	1	AUS	-23.539	150.868	1	1140	1.36935	3.022	0.000272331	3.62165
0574	0	AUS	-23.8193	151.214	1	1130	1.43572	2.831	0.000288081	4.23029
0575	1	AUS	-23.934	151.357	1	1125	1.43572	2.72	0.000479414	4.28037
0576	1	AUS	-24.5077	152.052	0	NaN	1.51434	2.066	0.000695743	3.46188
0577	1	AUS	-24.5939	152.12	0	NaN	1.51434	2.0645	0.000690851	3.48776
0578	1	AUS	-24.6465	152.185	1	1161	1.51434	2.027	0.000699925	3.48776
0579	1	AUS	-24.7545	152.401	1	1128	1.51434	1.886	0.000725773	3.38587
0580	0	AUS	-25.1781	152.616	1	1129	0.826463	1.832	0.000444423	3.08906
0581	0	AUS	-25.4335	152.929	0	NaN	0.826463	1.5945	9.34713e-05	3.42078
0582	0	AUS	-26.3805	153.079	0	NaN	2.40963	1.4775	0.00211566	3.19243
0583	0	AUS	-26.6493	153.103	0	NaN	2.40963	1.462	0.00185405	3.3765
0584	0	AUS	-27.1529	153.044	0	NaN	2.09839	1.451	0.000487456	3.65042
0585	0	AUS	-27.2797	153.063	0	NaN	1.86702	1.446	0.000385164	3.65042
0586	0	AUS	-27.3999	153.156	1	1126	1.86702	1.442	0.000468711	3.78362
0587	1	AUS	-27.6933	153.344	0	NaN	1.86702	1.435	0.00126881	3.86255
0588	0	AUS	-27.9349	153.428	0	NaN	2.11573	1.426	0.00227149	3.90812
0589	0	AUS	-28.1696	153.555	0	NaN	2.11573	1.424	0.0029599	3.87953
0590	0	AUS	-28.8764	153.59	0	NaN	2.75059	1.407	0.00358724	4.21724
0591	0	AUS	-29.4271	153.365	1	1131	2.3442	1.397	0.00268176	4.03174
0592	0	AUS	-30.5018	153.033	0	NaN	2.60675	1.381	0.00271468	3.08743
0593	0	AUS	-30.6512	153.016	0	NaN	2.60675	1.38	0.00322831	3.27093
0594	0	AUS	-30.8733	153.025	1	1165	2.71059	1.376	0.00379699	3.71607
0595	0	AUS	-31.426	152.918	0	NaN	2.36453	1.371	0.0039101	4.56781
0596	1	AUS	-31.6233	152.754	0	NaN	2.36453	1.368	0.00216099	4.75392
0597	1	AUS	-31.6983	152.754	0	NaN	2.36453	1.368	0.00287993	4.75392
0598	1	AUS	-31.7145	152.742	0	NaN	2.36453	1.368	0.00264288	4.75392
0599	1	AUS	-31.8826	152.687	0	NaN	2.63302	1.3665	0.00353362	4.96676
0600	0	AUS	-32.1738	152.51	0	NaN	2.54977	1.357	0.00274851	4.99214
0601	0	AUS	-32.52	152.248	0	NaN	2.54977	1.345	0.00370582	4.45191
0602	1	AUS	-32.6797	151.977	0	NaN	2.49971	1.343	0.000919811	4.98759
0603	0	AUS	-32.9165	151.796	1	1154	2.49971	1.338	0.00465692	5.11292
0604	1	AUS	-33.3009	151.466	0	NaN	2.23622	1.321	0.00263982	4.72124
0605	1	AUS	-33.3297	151.466	0	NaN	2.23622	1.319	0.00299783	4.72124
0606	0	AUS	-33.5729	151.254	1	1151	2.23622	1.3035	0.00260489	4.9491
0607	1	AUS	-34.5011	150.836	0	NaN	2.2515	1.278	0.00395146	4.40061
0608	1	AUS	-34.5496	150.811	0	NaN	2.2515	1.278	0.00353695	4.40061
0609	1	AUS	-34.902	150.763	1	1182	2.31512	1.267	0.00316044	4.30114
0610	1	AUS	-35.1044	150.564	0	NaN	2.13283	1.258	0.00208575	4.17217
0611	0	AUS	-35.7075	150.184	0	NaN	2.13283	1.231	0.00414516	4.87687
0612	0	AUS	-35.8374	150.185	0	NaN	2.23367	1.2305	0.0051475	4.65519
0613	0	AUS	-35.9064	150.151	0	NaN	2.23367	1.229	0.00512889	4.65519
0614	0	AUS	-36.0665	150.137	0	NaN	2.23367	1.227	0.00481416	4.65519
0615	1	AUS	-36.355	150.034	0	NaN	2.32999	1.218	0.00415353	4.58255
0616	1	AUS	-36.3821	150.05	0	NaN	2.32999	1.218	0.00479693	4.58255
0617	0	AUS	-36.4218	150.073	0	NaN	2.32999	1.22	0.00606017	4.58255
0618	0	AUS	-36.5257	150.058	0	NaN	2.32999	1.216	0.00588833	4.58255
0619	0	AUS	-36.7003	149.985	0	NaN	1.89906	1.21	0.00489581	4.22244
0620	0	AUS	-37.1116	149.913	0	NaN	1.89906	1.2	0.00354027	4.50669
0621	0	AUS	-37.5006	149.708	0	NaN	2.29976	1.171	0.00174858	4.52976
0622	0	AUS	-37.7477	149.513	0	NaN	2.51122	1.157	0.00556833	4.52976
0623	1	AUS	-37.7455	149.132	0	NaN	2.17343	1.144	0.00424223	4.57368
0624	1	AUS	-37.7578	148.989	0	NaN	2.17343	1.14	0.00336961	4.49771
0625	0	AUS	-37.8025	148.549	1	1184	1.86173	1.1345	0.0016591	3.64823
0626	0	AUS	-37.8598	148.089	0	NaN	1.5338	1.139	0.00145364	3.64181
0627	1	AUS	-37.858	147.794	0	NaN	1.5338	1.1535	0.000567924	4.22509
0628	0	AUS	-37.8445	147.735	0	NaN	1.5338	1.1535	0.000228367	4.22509
0629	1	AUS	-37.8751	147.689	0	NaN	1.5338	1.1535	0.000229287	4.22509
0630	1	AUS	-38.0483	147.268	0	NaN	1.51888	1.2045	5.46762e-05	3.80634
0631	1	AUS	-38.1185	147.237	0	NaN	1.51888	1.2045	8.13579e-05	3.80634
0632	0	AUS	-38.696	145.843	0	NaN	2.24349	1.957	0.00151815	4.76351
0633	0	AUS	-37.8508	144.906	1	1199	2.25059	2.61	0.000487285	2.7868
0634	0	AUS	-38.4029	142.509	0	NaN	4.15897	1.296	0.00455009	3.37558
0635	0	AUS	-38.0597	140.987	1	1148	4.84751	1.254	0.002776	3.56454
0636	0	AUS	-35.3654	139.366	1	1172	NaN	1.459	0.00119709	NaN
0637	0	AUS	-35.1646	138.469	0	NaN	0.623143	1.439	0.00182639	8.33588
0638	0	AUS	-32.6073	137.769	0	NaN	NaN	1.872	0.000275124	2.96049
0639	0	AUS	-34.5922	135.903	0	NaN	2.78888	1.3665	0.000403889	3.53878
0640	0	AUS	-33.8078	121.179	0	NaN	3.35749	1.236	0.00267017	4.29653
0641	0	AUS	-33.8606	121.015	0	NaN	3.35749	1.229	0.00209577	4.37455
0642	1	AUS	-33.8896	120.076	0	NaN	2.55112	1.225	0.0015001	4.94349
0643	0	AUS	-34.0837	119.588	0	NaN	2.55112	1.217	0.00580617	4.84663
0644	0	AUS	-34.2881	119.463	0	NaN	2.9645	1.202	0.00163964	4.43182
0645	0	AUS	-34.3644	119.371	0	NaN	2.9645	1.198	0.00196825	4.43182
0646	0	AUS	-34.4602	118.852	0	NaN	2.96303	1.187	0.00188833	4.18511
0647	0	AUS	-34.9576	117.968	0	NaN	3.48412	1.156	0.000736526	5.45087
0648	0	AUS	-34.9707	117.463	0	NaN	5.07618	1.115	0.00198682	4.66644
0649	1	AUS	-35.0011	116.756	0	NaN	4.52263	1.0965	0.0022521	4.55208
0650	1	AUS	-35.007	116.707	0	NaN	4.52263	1.0825	0.00249801	4.55208
0651	0	AUS	-34.6132	115.829	1	1193	4.38878	1.048	0.00221084	4.53392
0652	0	AUS	-34.2961	115.17	1	1124	4.82929	1.029	0.00198931	4.64224
0653	1	AUS	-42.1915	145.348	0	NaN	4.9359	1.1785	0.00156777	2.80731
0654	0	AUS	-42.432	145.507	0	NaN	5.15873	1.1735	0.00120682	2.9374
0655	0	AUS	-42.7248	145.393	0	NaN	5.11706	1.163	0.00484353	3.39149
0656	0	AUS	-43.0669	145.683	0	NaN	5.11706	1.145	0.00529011	3.85515
0657	0	AUS	-43.1935	145.914	0	NaN	5.1818	1.13	0.0027352	3.85547
0658	1	AUS	-43.1173	146.999	0	NaN	3.33348	1.2	0.000448535	3.68634
0659	0	AUS	-42.7419	147.188	1	1137	NaN	1.145	NaN	NaN
0660	0	AUS	-42.749	147.255	0	NaN	NaN	1.122	0.000167517	3.26064
0661	0	AUS	-42.7803	147.438	0	NaN	2.21124	1.003	0.000336603	3.26064
0662	0	AUS	-42.7798	147.457	0	NaN	2.21124	1.003	0.000354577	3.26064
0663	0	AUS	-41.4629	148.267	0	NaN	1.885	1.057	0.00543278	3.02084
0664	0	AUS	-40.8327	148.125	0	NaN	1.17209	1.074	0.000776656	3.063
0665	0	AUS	-41.3998	147.114	1	1190	1.23867	1.596	NaN	NaN
0666	1	AUS	-41.1707	146.251	0	NaN	1.4419	1.687	0.00207671	3.6275
0667	0	AUS	-41.1487	146.168	0	NaN	1.35145	1.685	0.00235913	3.6275
0668	0	AUS	-41.0571	144.66	0	NaN	4.4783	1.1805	0.00235863	3.24414
0669	0	AUS	-41.6681	144.921	0	NaN	4.9359	1.179	0.00746843	3.50698
0670	0	AUS	-42.0611	145.252	0	NaN	4.9359	1.1795	0.00611686	2.56978
0671	1	AUS	-46.1968	167.616	1	1314	3.60403	1.214	0.00147668	4.68336
0672	1	AUS	-46.339	168.005	0	NaN	1.0672	1.205	0.000359779	4.64021
0673	0	AUS	-46.4637	168.284	1	1294	1.0672	1.147	0.000116661	4.57794
0674	0	AUS	-46.5825	168.797	1	1285	3.49107	1.066	0.00156202	4.67789
0675	0	AUS	-46.5621	169.479	0	NaN	3.74399	0.972	0.00501356	4.6085
0676	1	AUS	-46.3448	169.811	1	1274	2.43064	0.9465	0.00351541	4.53376
0677	0	AUS	-46.2181	170.049	0	NaN	2.43064	0.9335	0.00292891	4.60392
0678	0	AUS	-46.0548	170.204	1	1305	2.11729	0.923	0.00244238	4.60392
0679	0	AUS	-45.6403	170.661	0	NaN	2.07013	0.895	0.00189156	4.94153
0680	0	AUS	-45.1873	170.899	1	1282	2.07013	0.895	0.00124363	4.78375
0681	1	AUS	-44.937	171.147	1	1327	2.20669	0.896	0.00179027	4.71808
0682	0	AUS	-44.5033	171.213	0	NaN	1.69174	0.935	0.000926241	4.85846
0683	0	AUS	-44.2808	171.351	1	1292	1.69174	0.942	0.000821345	4.82094
0684	0	AUS	-44.2422	171.408	1	1293	1.69174	0.942	0.00078178	4.82094
0685	0	AUS	-44.1875	171.509	1	1302	1.69174	0.939	0.00086186	4.82094
0686	0	AUS	-44.0532	171.805	0	NaN	1.48492	0.9305	0.000895297	4.72663
0687	1	AUS	-43.9023	172.205	1	1300	1.48492	0.9	0.00104786	4.68741
0688	0	AUS	-43.3902	172.712	1	1319	1.24847	0.814	0.000115753	4.89223
0689	0	AUS	-43.2699	172.728	1	1270	1.24847	0.808	0.000113283	4.89223
0690	0	AUS	-43.1987	172.764	0	NaN	1.24847	0.7885	0.000173601	4.88766
0691	0	AUS	-43.1535	172.798	1	1322	1.24847	0.7885	0.000268655	4.88766
0692	0	AUS	-42.9037	173.294	1	1279	2.01325	0.7	0.00328675	4.88073
0693	0	AUS	-42.7738	173.379	1	1315	2.01325	0.669	0.00671459	4.91245
0694	0	AUS	-42.6119	173.472	0	NaN	2.01325	0.667	0.0191098	4.91245
0695	0	AUS	-42.419	173.633	0	NaN	2.13428	0.651	0.0330644	4.89008
0696	0	AUS	-42.3276	173.741	0	NaN	2.13428	0.643	0.034376	4.89008
0697	1	AUS	-42.1728	173.932	1	1273	2.13428	0.635	0.0208414	5.34431
0698	0	AUS	-41.9023	174.122	0	NaN	2.39698	0.626	0.00569768	5.8375
0699	1	AUS	-41.6067	174.168	1	1271	1.80394	0.626	0.00305068	5.49808
0700	1	AUS	-41.4403	174.032	1	1323	1.39653	0.7345	0.00191088	4.53476
0701	1	AUS	-41.2502	173.11	0	NaN	0.642888	1.768	0.000104444	1.38775
0702	1	AUS	-41.0802	173.022	1	1290	0.642888	1.7645	0.000239852	1.38775
0703	1	AUS	-40.8164	172.804	1	1306	0.642888	1.734	0.000403637	1.78884
0704	1	AUS	-40.6738	172.684	0	NaN	3.03145	1.716	0.000640285	3.48076
0705	0	AUS	-40.6989	172.366	0	NaN	3.03145	1.686	0.00305906	4.43517
0706	0	AUS	-40.7278	172.313	0	NaN	3.03145	1.681	0.00336458	4.43517
0707	0	AUS	-40.9864	172.105	0	NaN	3.13371	1.641	0.00488635	4.92868
0708	0	AUS	-41.2619	172.094	1	1283	3.13371	1.63	0.00309836	4.75027
0709	0	AUS	-41.3917	172.057	0	NaN	3.13371	1.62	0.00228165	4.55914
0710	0	AUS	-41.5214	171.937	1	1288	3.23498	1.6065	0.00222886	4.55914
0711	0	AUS	-41.6066	171.876	0	NaN	3.23498	1.6065	0.00193532	4.4351
0712	0	AUS	-41.6979	171.746	0	NaN	3.23498	1.605	0.00205473	4.50446
0713	1	AUS	-41.7296	171.588	1	1272	3.23498	1.571	0.00366879	4.50446
0714	0	AUS	-41.8975	171.444	0	NaN	3.23498	1.548	0.00403878	4.84361
0715	0	AUS	-42.0315	171.383	0	NaN	3.56084	1.517	0.00364743	4.84361
0716	0	AUS	-42.1227	171.329	0	NaN	3.56084	1.509	0.00355365	4.95123
0717	1	AUS	-42.441	171.194	1	1276	2.87604	1.485	0.00306926	5.00909
0718	0	AUS	-42.5638	171.125	1	1307	2.87604	1.4645	0.00359648	5.00909
0719	1	AUS	-42.6615	171.028	0	NaN	2.87604	1.457	0.0039822	4.95228
0720	0	AUS	-42.7248	170.948	1	1278	2.87604	1.451	0.00392011	4.95228
0721	1	AUS	-42.852	170.829	0	NaN	2.55365	1.442	0.00239633	4.91265
0722	1	AUS	-42.9039	170.755	0	NaN	2.55365	1.442	0.00162019	4.83463
0723	0	AUS	-42.9576	170.657	1	1326	2.55365	1.425	0.00159084	4.83463
0724	0	AUS	-43.0345	170.43	0	NaN	2.55365	1.4225	0.00276014	4.72452
0725	0	AUS	-43.0467	170.407	0	NaN	2.55365	1.421	0.00298181	4.72452
0726	0	AUS	-43.1195	170.253	1	1334	2.55365	1.409	0.00469873	4.3442
0727	0	AUS	-43.2852	170.053	1	1316	3.33597	1.385	0.00588965	4.3442
0728	0	AUS	-43.3136	170.029	0	NaN	3.33597	1.3815	0.00533045	4.26425
0729	0	AUS	-43.3352	170.008	0	NaN	3.33597	1.3815	0.00537506	4.26425
0730	0	AUS	-43.4317	169.788	0	NaN	2.93591	1.359	0.00715256	4.38419
0731	0	AUS	-43.4569	169.767	0	NaN	2.93591	1.359	0.00557184	4.38419
0732	0	AUS	-43.4884	169.74	0	NaN	2.93591	1.3535	0.00436027	4.38419
0733	0	AUS	-43.567	169.636	0	NaN	2.93591	1.345	0.00290385	4.38419
0734	0	AUS	-43.6002	169.59	0	NaN	2.93591	1.339	0.00331996	4.49549
0735	0	AUS	-43.6319	169.438	0	NaN	2.93591	1.3345	0.00620546	4.58504
0736	0	AUS	-43.7001	169.257	0	NaN	2.93591	1.324	0.0130749	4.61666
0737	0	AUS	-43.7059	169.245	0	NaN	3.59301	1.324	0.0129451	4.61666
0738	0	AUS	-43.786	169.117	0	NaN	3.59301	1.311	0.0149117	4.61666
0739	0	AUS	-43.832	169.039	1	1277	3.59301	1.304	0.0114163	4.62803
0740	0	AUS	-43.8949	168.914	0	NaN	3.59301	1.301	0.00716056	4.62803
0741	0	AUS	-43.9721	168.8	0	NaN	3.16624	1.28	0.00646828	4.62803
0742	1	AUS	-43.9941	168.683	1	1268	3.16624	1.262	0.0139996	4.55197
0743	0	AUS	-44.03	168.363	0	NaN	3.16624	1.2465	0.039128	4.45074
0744	0	AUS	-44.087	168.321	0	NaN	3.16624	1.246	0.0249426	4.36377
0745	0	AUS	-44.1832	168.195	0	NaN	3.97463	1.237	0.0384355	4.26075
0746	0	AUS	-44.3274	168.095	0	NaN	3.97463	1.2285	0.0286267	4.31324
0747	1	AUS	-44.3545	168.005	0	NaN	3.97463	1.228	0.0440988	4.34006
0748	0	AUS	-44.4067	167.917	0	NaN	3.97463	1.219	0.0493092	4.34006
0749	0	AUS	-41.2394	174.9	1	1280	2.08876	0.581	0.00203299	4.98878
0750	0	AUS	-41.3717	175.142	1	1304	2.08876	0.578	0.0121222	5.50749
0751	1	AUS	-41.5664	175.401	0	NaN	2.08876	0.578	0.0327522	5.7863
0752	0	AUS	-41.5661	175.424	0	NaN	2.08876	0.578	0.0410437	5.7863
0753	0	AUS	-41.505	175.518	0	NaN	2.60414	0.578	0.0424196	5.86989
0754	0	AUS	-41.4147	175.675	0	NaN	2.60414	0.5775	0.037195	5.86989
0755	0	AUS	-41.3975	175.721	1	1296	2.60414	0.577	0.0364021	5.86989
0756	1	AUS	-41.2693	175.891	0	NaN	2.60414	0.571	0.0230815	5.82243
0757	1	AUS	-41.2547	175.92	0	NaN	2.60414	0.571	0.0258043	5.82243
0758	0	AUS	-41.0159	176.108	1	1333	2.59934	0.569	0.006814	5.38067
0759	0	AUS	-40.6799	176.352	0	NaN	2.59934	0.567	0.00701198	5.36221
0760	0	AUS	-40.6094	176.417	0	NaN	2.59934	0.5665	0.0073048	5.36221
0761	0	AUS	-40.2664	176.689	1	1299	2.79062	0.567	0.0113616	5.43312
0762	0	AUS	-39.5985	176.947	1	1309	1.49537	0.584	0.00174583	5.23128
0763	0	AUS	-39.5685	176.929	2	1291, 1311	1.49537	0.585	0.00139537	5.23128
0764	0	AUS	-39.1707	177.087	0	NaN	1.49537	0.6	0.00189762	4.71458
0765	0	AUS	-39.1254	177.195	1	1286	1.49537	0.598	0.0019181	4.71458
0766	0	AUS	-39.0637	177.421	1	1324	2.46125	0.5955	0.00159175	4.78753
0767	0	AUS	-38.7124	177.943	1	1321	2.58623	0.592	0.00176585	5.10464
0768	0	AUS	-38.6746	178.022	0	NaN	2.58623	0.592	0.00215862	5.10464
0769	0	AUS	-38.3738	178.308	1	1312	2.84318	0.601	0.00401127	4.77655
0770	0	AUS	-37.7796	178.482	1	1313	2.59841	0.663	0.00446732	4.98902
0771	0	AUS	-37.6307	178.378	0	NaN	2.74307	0.6915	0.0132884	4.98902
0772	0	AUS	-37.616	178.336	0	NaN	2.74307	0.704	0.0172723	4.98902
0773	0	AUS	-37.5687	177.992	0	NaN	2.22676	0.7365	0.0133988	4.82468
0774	0	AUS	-37.6553	177.859	0	NaN	2.22676	0.746	0.00658826	4.82468
0775	0	AUS	-37.7072	177.718	0	NaN	1.97132	0.7605	0.00569994	4.68994
0776	0	AUS	-37.7982	177.655	0	NaN	1.97132	0.7655	0.00358989	4.68994
0777	1	AUS	-37.8603	177.584	1	1289	1.97132	0.773	0.00297503	4.66385
0778	0	AUS	-37.9915	177.261	1	1320	1.97132	0.78	0.00154995	4.91789
0779	0	AUS	-37.9907	177.207	0	NaN	1.79897	0.782	0.0016885	4.91789
0780	0	AUS	-37.9432	177.01	1	1330	1.79897	0.7835	0.0024225	5.35462
0781	0	AUS	-37.909	176.882	1	1301	1.79897	0.787	0.00282901	5.35462
0782	0	AUS	-37.89	176.789	1	1308	1.79897	0.787	0.00225806	5.49692
0783	0	AUS	-37.7473	176.415	1	1281	1.60178	0.792	0.0022266	5.25524
0784	0	AUS	-37.6791	176.104	0	NaN	1.60178	0.794	0.00112635	4.99098
0785	0	AUS	-37.2309	175.881	0	NaN	1.86351	0.795	0.00261619	4.94585
0786	0	AUS	-37.1137	175.889	0	NaN	1.86351	0.7965	0.00344141	4.94585
0787	0	AUS	-37.0053	175.864	0	NaN	1.86351	0.797	0.00305412	4.8966
0788	1	AUS	-36.8667	175.697	0	NaN	1.86351	0.807	0.00225864	4.39829
0789	0	AUS	-37.1651	175.537	1	1317	1.86351	0.8035	7.51916e-05	4.25264
0790	0	AUS	-37.1878	175.499	1	1298	1.86351	0.802	6.71619e-05	4.25264
0791	0	AUS	-36.1846	174.056	1	1325	3.78341	1.556	0.0015913	4.82805
0792	1	AUS	-37.3448	174.749	1	1318	3.21165	1.639	0.00157589	4.98922
0793	0	AUS	-38.7057	174.615	1	1287	2.73352	1.723	0.00175236	5.86167
0794	0	AUS	-38.815	174.584	0	NaN	2.73352	1.723	0.00150782	5.86167
0795	0	AUS	-38.9881	174.228	1	1328	2.9804	1.729	0.00280041	5.62733
0796	1	AUS	-39.1719	173.82	0	NaN	2.9804	1.7455	0.00521348	5.02427
0797	0	AUS	-39.7732	174.49	1	1297	2.22659	1.688	0.00127034	2.05709
0798	0	AUS	-39.8517	174.683	1	1329	2.22659	1.673	0.00153857	0.312518
0799	1	AUS	-39.9485	174.982	1	1332	2.22659	1.629	0.00153857	1.85609
0800	0	AUS	-40.0482	175.106	1	1331	1.88821	1.629	0.00198307	3.73791
0801	0	AUS	-40.0733	175.134	1	1310	1.88821	1.629	0.00218107	3.73791
0802	1	AUS	-40.304	175.225	1	1303	1.88821	1.605	0.00318318	4.97912
0803	0	AUS	-40.481	175.21	1	1284	1.88821	1.605	0.00349608	4.97912
0804	0	AUS	-40.7606	175.101	1	1295	1.88821	1.5135	0.00381171	5.69503
0805	1	AUS	-18.1477	178.525	1	1200	1.95221	0.867	0.0644738	4.18727
0806	0	AUS	-17.8248	178.579	0	NaN	0.945009	0.8625	0.000681407	4.1514
0807	1	AUS	-17.439	177.633	0	NaN	0.482434	1.321	0.00112119	3.60415
0808	0	AUS	-17.8071	177.365	0	NaN	0.482434	1.118	0.000885225	3.8081
0809	0	AUS	-18.0528	177.303	0	NaN	2.24975	1.059	0.0853282	4.01546
0810	0	AUS	-18.1732	177.516	1	1201	2.40644	1.0195	0.0910325	4.07024
0811	1	AUS	-18.2601	178.154	0	NaN	1.68216	0.896	0.041414	4.21065
0812	0	AUS	-10.7814	161.925	0	NaN	2.08737	1.295	0.0429371	5.51116
0813	0	AUS	-10.8374	162.137	0	NaN	2.08737	1.312	0.0318024	5.41869
0814	0	AUS	-10.6842	162.22	0	NaN	1.84878	1.361	0.0614669	5.53791
0815	0	AUS	-10.5056	162.026	0	NaN	1.84878	1.449	0.0463649	5.6073
0816	0	AUS	-10.4789	161.969	0	NaN	1.84878	1.42	0.0400535	5.6073
0817	1	AUS	-10.4106	161.732	0	NaN	1.69682	1.41	0.019766	5.56982
0818	0	AUS	-9.79816	159.845	0	NaN	1.33006	1.1175	0.130341	5.62868
0819	1	AUS	-9.82612	160.061	0	NaN	1.33006	1.129	0.142192	5.62868
0820	1	AUS	-9.8189	160.163	0	NaN	1.33006	1.147	0.118391	5.6753
0821	0	AUS	-9.81352	160.206	0	NaN	1.33006	1.167	0.114001	5.6753
0822	1	AUS	-9.80991	160.241	0	NaN	1.33006	1.167	0.111647	5.6753
0823	1	AUS	-9.80825	160.262	0	NaN	1.16563	1.167	0.112162	5.6753
0824	1	AUS	-9.84634	160.376	0	NaN	1.16563	1.206	0.130121	5.67496
0825	1	AUS	-9.89885	160.51	0	NaN	1.16563	1.215	0.0835567	5.67496
0826	0	AUS	-9.93596	160.605	0	NaN	1.16563	1.215	0.0659105	5.63926
0827	1	AUS	-9.64452	160.661	0	NaN	0.406019	1.295	0.0200642	5.65585
0828	0	AUS	-9.58764	160.615	0	NaN	0.406019	1.33	0.0228308	5.65585
0829	1	AUS	-9.56739	160.597	0	NaN	0.406019	1.33	0.0275169	5.60849
0830	0	AUS	-9.49095	160.464	0	NaN	0.406019	1.3145	0.0168068	5.63408
0831	1	AUS	-9.42134	160.296	0	NaN	0.406019	1.33	0.0107573	5.65133
0832	1	AUS	-9.40806	160.146	0	NaN	0.406019	1.33	0.0132408	5.65133
0833	1	AUS	-9.40724	160.027	0	NaN	0.595792	1.33	0.0237438	5.65039
0834	0	AUS	-9.24788	161.006	0	NaN	0.592439	1.519	0.0536387	5.52241
0835	0	AUS	-9.27453	161.223	0	NaN	0.592439	1.56	0.00921413	5.5294
0836	0	AUS	-8.83312	160.951	0	NaN	1.36222	1.6165	0.0232511	5.46898
0837	0	AUS	-8.71112	160.944	0	NaN	1.36222	1.627	0.0355683	5.48851
0838	0	AUS	-8.56857	160.723	0	NaN	1.05731	1.6445	0.032252	5.48549
0839	0	AUS	-8.27932	159.761	0	NaN	0.861913	1.639	0.00377329	5.65472
0840	0	AUS	-7.99672	159.295	0	NaN	1.14954	1.7355	0.0107286	5.68861
0841	1	AUS	-7.59182	158.701	0	NaN	1.42945	1.753	0.0396392	5.58899
0842	0	AUS	-7.79957	158.688	0	NaN	1.27481	1.7415	0.0684473	5.58899
0843	0	AUS	-7.90809	158.804	0	NaN	0.973936	1.65	0.0779895	5.53978
0844	0	AUS	-8.36593	159.548	0	NaN	0.674223	1.5	0.0339854	5.55093
0845	0	AUS	-6.93035	157.058	0	NaN	1.23445	1.7285	0.0552835	5.73183
0846	0	AUS	-6.65571	156.616	0	NaN	1.44837	1.7135	0.0395106	5.75299
0847	0	AUS	-6.97923	156.713	0	NaN	1.09085	1.4995	0.0207303	5.77944
0848	0	AUS	-7.29039	157.081	0	NaN	0.628148	1.285	0.0446853	5.71338
0849	0	AUS	-5.76879	154.7	0	NaN	1.26932	1.397	0.0142611	5.43495
0850	0	AUS	-6.12075	154.959	0	NaN	1.24483	1.46	0.00412509	5.38311
0851	1	AUS	-6.19844	154.975	0	NaN	1.24483	1.3025	0.00428982	5.38311
0852	1	AUS	-6.3962	155.196	1	1337	1.24483	1.398	0.00333077	5.4746
0853	0	AUS	-6.66116	155.281	0	NaN	1.24483	1.27	0.00626226	5.54673
0854	0	AUS	-6.80466	155.46	0	NaN	1.32513	1.255	0.0179748	5.70169
0855	1	AUS	-6.84094	155.525	0	NaN	1.32513	1.2545	0.0161374	5.70169
0856	1	AUS	-6.79216	155.795	0	NaN	1.16316	1.382	0.00165288	5.81775
0857	0	AUS	-6.75398	155.851	0	NaN	1.16316	1.509	0.00188122	5.81775
0858	1	AUS	-6.5044	155.919	0	NaN	1.25058	1.676	0.00843446	5.72379
0859	1	AUS	-4.18823	152.684	0	NaN	1.01856	1.4125	0.074066	4.81227
0860	1	AUS	-4.348	152.684	0	NaN	1.06531	1.404	0.0909959	4.85727
0861	1	AUS	-4.43357	152.662	0	NaN	1.06531	1.391	0.0974331	4.85727
0862	1	AUS	-4.45077	152.65	0	NaN	1.06531	1.381	0.101204	4.85727
0863	1	AUS	-4.67723	152.741	0	NaN	1.06531	1.349	0.110191	4.96151
0864	0	AUS	-4.77065	152.937	0	NaN	1.36424	1.368	0.0606954	5.21504
0865	0	AUS	-4.62673	153.025	0	NaN	1.36424	1.3915	0.0904785	5.10526
0866	1	AUS	-4.71225	151.656	0	NaN	0.519062	1.366	0.0152999	4.54369
0867	0	AUS	-4.92168	151.653	0	NaN	0.519062	1.321	0.00660674	4.52042
0868	1	AUS	-4.936	151.443	0	NaN	0.519062	1.367	0.00671699	4.49299
0869	1	AUS	-5.39047	150.993	0	NaN	0.509345	1.369	0.00827565	4.6752
0870	1	AUS	-5.53821	150.659	0	NaN	0.625702	1.372	0.00555559	4.8276
0871	1	AUS	-5.53767	150.223	0	NaN	0.78833	1.3725	0.00902068	5.06867
0872	1	AUS	-5.49206	149.906	0	NaN	0.598444	1.3675	0.00305706	5.10211
0873	1	AUS	-5.52657	149.744	0	NaN	0.598444	1.365	0.00327493	5.05843
0874	1	AUS	-5.52701	149.513	0	NaN	0.598444	1.3595	0.00516275	5.05843
0875	1	AUS	-5.56433	149.32	0	NaN	0.598444	1.357	0.00851857	4.9574
0876	0	AUS	-5.57384	149.265	0	NaN	0.598444	1.356	0.0085714	4.85006
0877	0	AUS	-5.54425	149.187	0	NaN	0.7243	1.354	0.0141085	4.84808
0878	1	AUS	-5.83359	148.555	0	NaN	0.965184	1.3655	0.00467072	4.71699
0879	1	AUS	-5.94781	148.845	0	NaN	0.965184	1.3665	0.0037891	4.76658
0880	0	AUS	-6.0853	149.179	0	NaN	1.32393	1.366	0.0392983	4.79697
0881	0	AUS	-6.06109	149.352	0	NaN	1.28246	1.365	0.0399182	4.90621
0882	0	AUS	-6.13965	149.492	0	NaN	1.28246	1.365	0.0368406	4.90621
0883	0	AUS	-6.27861	149.806	0	NaN	1.31683	1.361	0.102603	5.09388
0884	0	AUS	-6.28045	150.006	0	NaN	1.31683	1.3575	0.0953337	5.09388
0885	0	AUS	-6.24179	150.159	0	NaN	1.31683	1.3545	0.076801	5.08808
0886	0	AUS	-6.2216	150.484	0	NaN	1.36174	1.348	0.105499	4.87482
0887	1	AUS	-6.18844	150.531	0	NaN	1.36174	1.349	0.0919796	4.87482
0888	0	AUS	-6.14235	150.646	0	NaN	1.31056	1.3445	0.0949075	4.87482
0889	1	AUS	-6.02197	150.799	0	NaN	1.31056	1.34	0.0669091	4.68933
0890	0	AUS	-6.02648	150.851	0	NaN	1.31056	1.339	0.0925755	4.68933
0891	1	AUS	-5.96627	151.111	0	NaN	1.31056	1.333	0.15002	4.47417
0892	1	AUS	-5.86624	151.285	0	NaN	1.41425	1.331	0.151532	4.47417
0893	0	AUS	-5.76489	151.391	0	NaN	1.41425	1.328	0.124292	4.39233
0894	1	AUS	-5.51221	151.672	0	NaN	1.34164	1.3235	0.0613501	4.40491
0895	1	AUS	-5.51318	151.693	0	NaN	1.34164	1.3235	0.0655638	4.40491
0896	0	AUS	-5.54129	151.862	0	NaN	1.34164	1.323	0.119348	4.54913
0897	0	AUS	-5.47673	152	0	NaN	1.34164	1.323	0.13404	4.80744
0898	0	AUS	-5.45073	152.047	0	NaN	1.34164	1.323	0.119399	4.80744
0899	1	AUS	-4.51124	152.336	0	NaN	1.06531	1.3445	0.0862919	4.80204
0900	0	CAM	23.7707	-97.7352	1	979	1.61942	0.894	0.00169454	3.73894
0901	0	CAM	23.4059	-97.7668	0	NaN	1.67249	0.895	0.00179069	3.55472
0902	0	CAM	23.0554	-97.7622	1	940	1.7217	0.896	0.00168679	3.67724
0903	0	CAM	22.7144	-97.8533	0	NaN	1.7459	0.897	0.00115907	3.69554
0904	1	CAM	22.5743	-97.8738	0	NaN	1.7459	0.898	0.0010814	3.99923
0905	1	CAM	22.2616	-97.7894	2	964, 981	1.7459	0.898	0.00144131	4.18629
0906	1	CAM	21.6269	-97.6455	0	NaN	1.20813	0.902	0.00177315	4.97557
0907	1	CAM	21.5236	-97.6059	0	NaN	1.20813	0.904	0.00131171	4.97557
0908	1	CAM	21.4762	-97.5156	0	NaN	1.20813	0.904	0.00187931	4.97557
0909	0	CAM	21.3317	-97.4776	0	NaN	1.20813	0.904	0.000993591	5.07672
0910	1	CAM	21.2587	-97.4358	0	NaN	1.20813	0.906	0.000896256	5.07672
0911	0	CAM	21.0978	-97.3655	0	NaN	1.58661	0.907	0.000820054	5.05179
0912	0	CAM	20.9688	-97.3062	1	986	1.58661	0.908	0.000765602	5.05179
0913	0	CAM	20.7254	-97.1999	1	941	1.35483	0.908	0.000669989	4.94468
0914	0	CAM	20.6132	-97.1437	0	NaN	1.35483	0.909	0.000620598	4.81543
0915	1	CAM	20.474	-96.9991	1	982	1.35483	0.911	0.00130452	4.81543
0916	0	CAM	20.2442	-96.7857	1	962	1.35483	0.913	0.00242418	4.4944
0917	0	CAM	20.1665	-96.7122	1	960	1.51351	0.913	0.00294127	4.11836
0918	0	CAM	20.0418	-96.6083	0	NaN	1.51351	0.915	0.00353535	4.11836
0919	1	CAM	20.0022	-96.5738	0	NaN	1.51351	0.915	0.00388162	4.11836
0920	0	CAM	19.8943	-96.497	0	NaN	1.51351	0.915	0.00363852	3.96187
0921	1	CAM	19.4171	-96.3212	1	931	1.59581	0.917	0.00239265	4.46949
0922	0	CAM	19.3116	-96.2853	1	933	1.59581	0.919	0.00191812	4.46949
0923	0	CAM	19.1018	-96.0997	1	956	1.59581	0.9195	0.00113705	4.18359
0924	0	CAM	18.7307	-95.83	1	938	1.69135	0.921	0.00123477	3.76796
0925	1	CAM	18.7055	-95.6354	1	966	1.69135	0.922	0.00211837	3.78601
0926	1	CAM	18.5451	-94.846	0	NaN	1.57796	0.927	0.00380633	3.94972
0927	0	CAM	18.1592	-94.4099	1	945	1.57796	0.931	0.00153029	3.81756
0928	0	CAM	18.1743	-94.1295	1	985	1.54834	0.935	0.00156816	3.89649
0929	1	CAM	18.3595	-93.5772	0	NaN	1.45726	0.947	0.00157014	4.10165
0930	1	CAM	18.61	-92.6961	2	952, 987	1.17595	0.978	0.000739631	4.26404
0931	0	CAM	18.4463	-91.4768	0	NaN	0.823456	1.103	8.73081e-05	3.67884
0932	0	CAM	18.6104	-91.2448	1	939	0.823456	1.105	0.000146305	3.41396
0933	0	CAM	19.3587	-90.7235	1	942	0.683195	1.263	0.000223707	3.01218
0934	0	CAM	18.486	-88.315	1	954	NaN	0.277	6.29122e-05	3.79244
0935	1	CAM	17.5344	-88.2362	1	464	1.01212	0.281	0.000230202	3.79174
0936	1	CAM	16.8075	-88.2528	0	NaN	1.04313	0.284	0.000447661	3.99975
0937	0	CAM	16.1413	-88.7497	0	NaN	0.461805	0.284	0.00011003	3.46726
0938	0	CAM	16.0592	-88.852	1	465	0.461805	0.284	9.43207e-05	3.46726
0939	0	CAM	15.9782	-88.9354	0	NaN	0.461805	0.284	7.48305e-05	3.46726
0940	0	CAM	15.9001	-88.9119	1	466	0.461805	0.284	7.8446e-05	3.58645
0941	1	CAM	15.7497	-88.2719	1	490	0.461805	0.284	0.0081061	3.84403
0942	1	CAM	15.9192	-87.7187	1	501	1.05831	0.286	0.0280122	3.96665
0943	1	CAM	15.7909	-87.5941	0	NaN	1.05831	0.2875	0.000141797	4.00872
0944	1	CAM	15.7774	-87.0186	0	NaN	0.844358	0.2945	0.000146298	4.05153
0945	1	CAM	15.7615	-86.8911	0	NaN	0.844358	0.296	0.00031485	4.03168
0946	1	CAM	15.7996	-86.7767	0	NaN	0.844358	0.297	0.00073336	4.03168
0947	1	CAM	15.7856	-86.3853	0	NaN	0.691865	0.3015	0.000140265	4.03126
0948	0	CAM	15.8088	-86.299	0	NaN	0.691865	0.302	0.000138545	4.03126
0949	1	CAM	15.9046	-86.1198	0	NaN	0.947379	0.3035	0.000762111	4.0249
0950	1	CAM	15.957	-85.6927	1	496	1.13362	0.307	0.000855601	3.87157
0951	0	CAM	15.8705	-85.5181	0	NaN	1.13362	0.307	0.000823505	3.98376
0952	1	CAM	15.9561	-84.9178	1	499	1.24492	0.311	0.0031547	3.71589
0953	0	CAM	15.8765	-84.7	0	NaN	1.13414	0.312	0.00125411	3.91324
0954	1	CAM	15.8122	-84.2992	1	500	1.13414	0.3205	0.000369942	3.82057
0955	1	CAM	15.2494	-83.3855	0	NaN	0.309734	0.494	0.000129215	3.8378
0956	1	CAM	15.0034	-83.1288	1	498	0.316565	0.567	9.92836e-05	3.73936
0957	1	CAM	14.332	-83.2913	0	NaN	0.2968	0.709	7.3703e-05	3.42119
0958	0	CAM	13.9765	-83.4664	1	510	0.654597	0.7805	0.000111851	3.16444
0959	0	CAM	13.9924	-83.5199	0	NaN	0.36964	0.791	0.00013543	3.16444
0960	1	CAM	13.948	-83.4972	0	NaN	0.36964	0.789	0.000102805	3.10146
0961	0	CAM	13.6481	-83.6143	1	511	0.36964	0.797	8.18169e-05	NaN
0962	0	CAM	13.4703	-83.5515	0	NaN	0.36964	0.795	0.000128928	3.05165
0963	0	CAM	13.4113	-83.5603	1	513	0.36964	0.776	0.000132917	3.05165
0964	0	CAM	13.1994	-83.5662	0	NaN	0.717419	0.7265	0.000113373	3.05165
0965	1	CAM	12.9101	-83.513	1	509	0.717419	0.6515	0.000280726	3.55951
0966	0	CAM	12.82	-83.6807	1	512	0.717419	0.663	0.00011422	3.55951
0967	0	CAM	12.5534	-83.746	0	NaN	0.849352	0.637	6.81788e-05	3.89337
0968	0	CAM	12.4678	-83.7721	0	NaN	0.849352	0.598	6.36868e-05	4.17013
0969	1	CAM	12.0539	-83.7369	1	507	1.17915	0.558	0.000271846	4.3179
0970	0	CAM	11.8946	-83.8231	0	NaN	1.17915	0.547	9.87471e-05	4.25712
0971	0	CAM	11.5078	-83.7716	1	514	1.87541	0.543	0.00127527	4.23126
0972	0	CAM	11.2932	-83.8721	0	NaN	1.87541	0.545	0.00138024	4.07782
0973	1	CAM	10.801	-83.5854	1	515	2.01239	0.547	0.00992319	4.01472
0974	1	CAM	10.3175	-83.3581	1	471	2.08488	0.55	0.0123841	4.17683
0975	0	CAM	10.2219	-83.2763	0	NaN	1.95597	0.551	0.0123211	4.17683
0976	0	CAM	10.1184	-83.1916	1	468	1.95597	0.551	0.0122357	4.25945
0977	0	CAM	9.92486	-82.9959	0	NaN	1.95597	0.553	0.0115019	4.23401
0978	0	CAM	9.79648	-82.8952	0	NaN	1.95597	0.554	0.00993778	4.23401
0979	1	CAM	9.57324	-82.5649	1	472	2.0606	0.556	0.0210123	4.16783
0980	1	CAM	9.47056	-82.445	1	518	1.96532	0.556	0.0109903	4.33872
0981	1	CAM	9.00483	-82.1798	0	NaN	1.96532	0.559	7.68282e-05	4.04985
0982	1	CAM	8.94361	-81.9603	0	NaN	1.62663	0.559	8.10209e-05	3.88483
0983	1	CAM	8.99136	-81.9223	0	NaN	1.62663	0.559	0.000161983	4.11546
0984	0	CAM	8.82495	-81.5426	0	NaN	1.62663	0.558	0.00296845	3.95845
0985	0	CAM	8.79987	-81.3843	0	NaN	1.62663	0.558	0.00802452	3.92848
0986	1	CAM	8.78898	-81.2115	0	NaN	1.56376	0.5575	0.0098068	3.92848
0987	0	CAM	8.80966	-81.084	0	NaN	1.56376	0.557	0.0122412	3.84136
0988	0	CAM	8.82332	-81.0421	0	NaN	1.56376	0.557	0.0144084	3.84136
0989	0	CAM	8.84466	-80.9721	0	NaN	1.56376	0.5565	0.0118007	3.84136
0990	0	CAM	8.86923	-80.9095	0	NaN	1.56376	0.5565	0.0144696	3.73701
0991	0	CAM	8.88651	-80.8703	1	517	1.56376	0.556	0.0161229	3.73701
0992	0	CAM	8.91984	-80.7998	0	NaN	1.56376	0.555	0.0190479	3.73701
0993	0	CAM	8.95224	-80.7694	0	NaN	1.56376	0.554	0.020229	3.73701
0994	0	CAM	9.02303	-80.6823	0	NaN	1.56376	0.553	0.0174059	3.98573
0995	0	CAM	9.0781	-80.5724	0	NaN	2.05794	0.552	0.0107157	3.98573
0996	0	CAM	9.15608	-80.3071	0	NaN	2.05794	0.55	0.00298449	4.07823
0997	0	CAM	9.1937	-80.1877	0	NaN	1.74323	0.549	0.00279307	4.24315
0998	0	CAM	9.45444	-79.7405	0	NaN	1.74323	0.54	0.00292063	4.37275
0999	0	CAM	9.56693	-79.3061	0	NaN	2.47381	0.536	0.00290362	4.3747
1000	0	CAM	7.51702	-78.1705	0	NaN	1.69874	2.01	0.0343112	2.77368
1001	0	CAM	8.08279	-78.2986	1	520	1.46129	2.2545	0.00073841	3.07785
1002	0	CAM	8.24037	-77.9822	1	524	1.46129	0.548	5.18934e-05	3.7403
1003	0	CAM	8.75351	-78.6216	0	NaN	1.06837	2.429	0.000864831	4.06838
1004	0	CAM	8.85218	-78.7961	0	NaN	0.755271	2.412	0.000675945	4.54327
1005	0	CAM	8.99765	-79.1124	1	516	0.755271	2.595	0.000966969	4.5734
1006	0	CAM	9.02569	-79.2876	0	NaN	0.910853	2.599	0.0010109	4.53421
1007	0	CAM	8.87601	-79.7035	0	NaN	0.910853	2.599	0.000195248	4.43135
1008	0	CAM	8.18159	-80.4864	0	NaN	0.696891	2.46	0.000735682	2.65715
1009	0	CAM	8.09124	-80.4833	1	522	0.696891	2.46	0.000887907	2.65715
1010	0	CAM	7.99727	-80.3866	0	NaN	0.696891	2.416	0.00100521	2.65715
1011	0	CAM	7.36121	-80.3627	0	NaN	1.97874	2.007	0.0122428	2.76848
1012	0	CAM	7.27086	-80.422	0	NaN	1.97874	1.993	0.050371	2.76848
1013	0	CAM	7.28713	-80.9233	0	NaN	1.58532	1.956	0.0297623	2.82438
1014	0	CAM	7.43501	-80.9192	0	NaN	1.58532	1.957	0.00230732	2.82438
1015	1	CAM	7.74767	-81.0395	0	NaN	1.58532	1.956	7.24932e-05	2.98905
1016	0	CAM	7.91943	-81.0547	0	NaN	1.58532	1.957	8.10495e-05	2.98905
1017	0	CAM	7.85332	-81.191	1	521	1.58532	1.956	8.36995e-05	2.98905
1018	0	CAM	7.71627	-81.2451	0	NaN	1.58532	1.949	0.000813444	2.98905
1019	1	CAM	8.0272	-81.701	1	523	1.36934	1.9525	0.0020166	3.04682
1020	0	CAM	8.20875	-82.0046	0	NaN	1.36934	1.851	0.00103542	2.97313
1021	1	CAM	8.28637	-82.2856	0	NaN	1.72599	1.837	0.000249135	3.24753
1022	1	CAM	8.327	-82.7009	1	519	1.72599	1.796	0.00681977	3.24114
1023	1	CAM	8.55028	-83.165	0	NaN	1.83733	1.7465	0.001313	3.32249
1024	1	CAM	8.6946	-83.4653	0	NaN	1.83733	1.712	0.000985573	2.90545
1025	1	CAM	8.57055	-83.3237	0	NaN	1.83733	1.733	0.00111445	3.17163
1026	1	CAM	8.89373	-83.6029	0	NaN	1.83733	1.646	0.00321136	2.54057
1027	1	CAM	8.9592	-83.6303	1	470	1.55701	1.627	0.00357775	2.39485
1028	0	CAM	9.2543	-83.8693	0	NaN	1.55701	1.591	0.00398923	2.08699
1029	0	CAM	9.34123	-84.0197	0	NaN	1.55701	1.591	0.00448808	2.04495
1030	0	CAM	9.3744	-84.1166	0	NaN	1.55701	1.586	0.00494262	2.04495
1031	0	CAM	9.49145	-84.3384	0	NaN	1.61231	1.5725	0.0045622	1.96212
1032	0	CAM	9.54681	-84.5651	0	NaN	1.61231	1.5575	0.00357418	2.32038
1033	0	CAM	9.77879	-84.6382	1	469	1.61231	1.5515	0.00296451	2.69128
1034	0	CAM	9.95894	-84.7381	1	467	1.61231	1.549	0.000844699	2.68666
1035	0	CAM	10.1984	-85.2353	1	473	NaN	1.513	5.74775e-05	2.87827
1036	0	CAM	9.73667	-85.2344	0	NaN	1.76568	1.5325	0.00871622	2.64935
1037	0	CAM	9.96388	-85.6797	0	NaN	1.79102	1.47	0.0210493	2.58101
1038	0	CAM	11.5186	-86.1724	0	NaN	1.64691	1.436	0.00319634	2.24138
1039	0	CAM	11.6342	-86.3502	0	NaN	1.64691	1.4325	0.00251659	2.21418
1040	0	CAM	11.986	-86.6618	0	NaN	1.63678	1.422	0.00265443	2.33706
1041	0	CAM	12.9269	-87.3892	1	508	1.63314	1.457	7.66654e-05	2.35276
1042	1	CAM	13.1113	-87.3884	1	497	1.63314	1.633	8.90258e-05	2.35276
1043	1	CAM	13.4209	-87.625	0	NaN	1.41323	2.0395	7.74807e-05	2.45606
1044	1	CAM	13.4131	-87.8232	1	482	1.41323	1.572	8.11103e-05	2.42859
1045	1	CAM	13.2558	-88.8252	1	484	1.76198	1.3475	0.00154862	2.13563
1046	1	CAM	13.3549	-89.0381	0	NaN	1.76198	1.324	0.00174704	2.09838
1047	1	CAM	13.7732	-90.1999	1	485	1.71837	1.2175	0.00256667	1.77652
1048	1	CAM	13.8415	-90.3582	1	488	1.92992	1.21	0.00355414	1.54191
1049	0	CAM	13.9265	-90.7212	0	NaN	1.92992	1.192	0.00654737	1.81502
1050	1	CAM	13.9103	-90.9096	1	486	1.99387	1.183	0.0031817	1.81502
1051	0	CAM	13.952	-91.308	1	487	1.54104	1.1495	0.00138526	2.10046
1052	1	CAM	14.0446	-91.5416	1	491	1.54104	1.1375	0.00131015	2.06428
1053	0	CAM	14.1264	-91.6734	0	NaN	1.54104	1.102	0.00103249	2.06428
1054	1	CAM	14.2106	-91.8119	1	494	1.99409	1.096	0.00105553	2.12927
1055	1	CAM	14.503	-92.1916	0	NaN	1.78022	1.0735	0.0014855	2.20788
1056	1	CAM	14.5322	-92.2294	1	980	1.78022	1.072	0.00145331	2.1624
1057	0	CAM	14.7999	-92.5104	0	NaN	1.78022	1.064	0.00133957	2.01076
1058	0	CAM	14.9284	-92.6344	1	955	1.64373	1.058	0.00127615	2.01076
1059	1	CAM	16.1887	-95.1451	1	983	1.77201	0.938	0.00146998	2.23416
1060	0	CAM	15.7884	-96.0484	0	NaN	1.92407	0.892	0.0447679	2.21489
1061	0	CAM	15.6807	-96.6179	0	NaN	1.91039	0.86	0.0918147	1.98041
1062	0	CAM	15.7269	-96.7631	0	NaN	1.96842	0.8575	0.0659884	1.85206
1063	0	CAM	15.7364	-96.8508	0	NaN	1.96842	0.849	0.058415	1.85206
1064	0	CAM	15.8069	-97.0176	0	NaN	1.96842	0.8415	0.0518285	1.7745
1065	0	CAM	15.9305	-97.2479	0	NaN	1.96842	0.834	0.0477508	1.75094
1066	0	CAM	15.9459	-97.3466	0	NaN	2.01919	0.833	0.0404534	1.75094
1067	1	CAM	15.9561	-97.4867	0	NaN	2.01919	0.828	0.0353078	1.80822
1068	1	CAM	15.9852	-97.7887	1	988	1.89144	0.8255	0.0531617	1.84765
1069	1	CAM	16.1177	-97.9939	0	NaN	1.89144	0.824	0.0223482	1.93493
1070	0	CAM	16.2823	-98.4614	0	NaN	2.02662	0.828	0.00871042	2.17644
1071	1	CAM	16.5011	-98.7285	1	963	1.74168	0.837	0.0139766	2.41706
1072	0	CAM	16.5382	-98.7595	0	NaN	1.74168	0.839	0.0140439	2.41706
1073	1	CAM	16.5546	-98.8144	1	958	1.74168	0.839	0.0172192	2.41706
1074	0	CAM	16.5696	-99.0036	0	NaN	1.74168	0.839	0.0264639	2.39302
1075	1	CAM	16.6431	-99.1304	0	NaN	1.74168	0.8475	0.0254602	2.39302
1076	0	CAM	16.6851	-99.4917	0	NaN	1.9077	0.8535	0.0267752	2.19349
1077	0	CAM	16.6859	-99.5031	0	NaN	1.9077	0.8535	0.0261021	2.19349
1078	1	CAM	16.6842	-99.5974	1	965	1.9077	0.856	0.0235597	2.19349
1079	0	CAM	16.9479	-100.117	0	NaN	1.87445	0.89	0.0328161	1.92789
1080	0	CAM	17.0792	-100.486	0	NaN	1.87445	0.904	0.0389737	1.69648
1081	0	CAM	17.1316	-100.652	0	NaN	1.87445	0.914	0.0458684	1.69648
1082	0	CAM	17.2178	-100.903	0	NaN	2.01366	0.939	0.0631036	1.62074
1083	0	CAM	17.6989	-101.647	0	NaN	1.86961	1.012	0.0321405	1.91547
1084	1	CAM	17.9107	-101.863	1	957	2.02452	1.031	0.0344905	2.22238
1085	1	CAM	17.9424	-102.137	1	936	1.67762	1.042	0.029287	2.27945
1086	0	CAM	18.029	-102.538	0	NaN	1.67762	1.078	0.0110958	2.22696
1087	0	CAM	18.0331	-102.558	0	NaN	1.67762	1.083	0.011131	2.22696
1088	0	CAM	18.0481	-102.607	0	NaN	1.67762	1.083	0.0135815	2.22696
1089	0	CAM	18.0539	-102.658	0	NaN	1.67762	1.093	0.018202	2.22696
1090	1	CAM	18.0844	-102.791	0	NaN	1.86212	1.098	0.0243898	2.14788
1091	0	CAM	18.2344	-103.247	0	NaN	1.86212	1.144	0.0562689	2.33652
1092	0	CAM	18.2685	-103.348	0	NaN	2.01683	1.168	0.0657856	2.33652
1093	1	CAM	18.455	-103.56	0	NaN	1.88477	1.2125	0.0554329	2.2849
1094	1	CAM	18.6845	-103.739	1	944	1.88477	1.253	0.0221374	2.29953
1095	0	CAM	18.8628	-103.969	1	934	1.88477	1.279	0.0191438	2.12752
1096	0	CAM	19.1491	-104.589	1	943	1.65373	1.3535	0.0284666	2.52087
1097	1	CAM	19.1876	-104.659	0	NaN	1.65373	1.3535	0.0281492	2.52087
1098	0	CAM	19.2976	-104.91	1	969	1.93782	1.394	0.028697	2.66298
1099	0	CAM	19.3623	-104.995	0	NaN	1.93782	1.403	0.031774	2.66325
1100	1	CAM	19.6375	-105.211	0	NaN	2.00023	1.463	0.0259194	2.56792
1101	0	CAM	19.8457	-105.379	1	984	1.82411	1.5005	0.0173905	2.50118
1102	1	CAM	19.9913	-105.49	0	NaN	1.82411	1.569	0.0166053	2.41693
1103	0	CAM	20.3062	-105.642	0	NaN	1.5144	1.632	0.0268066	2.30397
1104	1	CAM	20.6746	-105.286	1	932	1.5144	1.7005	0.0204623	2.17519
1105	1	CAM	21.635	-105.445	1	974	0.769462	1.7415	0.00151323	1.75426
1106	1	CAM	21.8839	-105.451	1	973	0.769462	1.75	0.000367992	2.01956
1107	1	CAM	22.5457	-105.761	1	930	0.902543	1.835	0.00118033	2.71945
1108	0	CAM	22.8305	-106.035	1	937	0.902543	1.832	0.00161836	2.65574
1109	1	CAM	23.0915	-106.291	1	968	1.38443	1.831	0.00320492	2.57665
1110	0	CAM	23.4227	-106.561	0	NaN	1.38443	1.832	0.00303925	2.51062
1111	1	CAM	23.705	-106.812	1	967	1.51424	1.85	0.00184437	2.50963
1112	0	CAM	23.878	-106.931	1	951	1.51424	1.851	0.0014557	2.38497
1113	0	CAM	24.2472	-107.417	1	971	1.50528	1.874	0.00115691	2.38663
1114	1	CAM	24.4988	-107.708	1	948	1.39855	1.885	0.00091874	2.49229
1115	1	CAM	25.2822	-108.495	1	976	1.19236	1.891	0.000669156	2.31632
1116	1	CAM	25.8192	-109.428	1	950	0.987249	1.868	0.00716989	1.86973
1117	1	CAM	26.5875	-109.339	0	NaN	0.774844	1.861	0.00134333	1.53486
1118	1	CAM	26.736	-109.8	1	959	0.970054	1.851	0.00758936	2.07883
1119	1	CAM	27.6697	-110.612	1	989	0.883452	1.792	0.00593843	3.11404
1120	1	CAM	27.9646	-110.858	1	953	0.883452	1.784	0.00365949	2.6305
1121	1	CAM	30.5337	-112.982	1	947	0.851269	4.2205	0.00231077	5.38355
1122	1	CAM	31.672	-114.763	1	946	0.64355	5.0695	0.000756301	2.61728
1123	1	CAM	30.8823	-114.706	0	NaN	0.723244	4.868	0.00134996	1.8039
1124	1	CAM	30.4947	-114.633	0	NaN	0.673707	4.65	0.00189008	1.54434
1125	1	CAM	30.4456	-114.638	0	NaN	0.673707	4.65	0.00200677	1.54434
1126	1	CAM	30.266	-114.642	0	NaN	0.673707	4.551	0.00222831	2.16236
1127	1	CAM	30.2049	-114.666	0	NaN	0.673707	4.568	0.00201129	2.16236
1128	1	CAM	30.1134	-114.613	0	NaN	0.673707	4.551	0.00248908	3.71857
1129	1	CAM	30.0855	-114.594	0	NaN	0.673707	4.514	0.00278022	3.71857
1130	0	CAM	30.002	-114.552	0	NaN	0.673707	4.476	0.00369968	3.71857
1131	1	CAM	29.984	-114.539	0	NaN	0.673707	4.476	0.00521152	3.71857
1132	1	CAM	29.9665	-114.531	0	NaN	0.965214	4.475	0.00483567	3.71857
1133	1	CAM	29.9531	-114.494	0	NaN	0.965214	4.475	0.00458988	5.94475
1134	1	CAM	29.9306	-114.478	0	NaN	0.965214	4.475	0.00415052	5.94475
1135	1	CAM	29.8452	-114.411	0	NaN	0.965214	4.4045	0.00433599	5.94475
1136	1	CAM	29.7715	-114.361	0	NaN	0.965214	4.3975	0.00450698	5.94475
1137	0	CAM	29.7559	-114.235	0	NaN	0.965214	4.333	0.0102053	5.94475
1138	0	CAM	29.7033	-114.173	0	NaN	0.965214	4.323	0.0107611	6.52452
1139	0	CAM	29.6913	-114.161	0	NaN	0.965214	4.323	0.00958901	6.52452
1140	1	CAM	29.609	-114.055	0	NaN	0.965214	4.269	0.0204168	5.68316
1141	0	CAM	29.5952	-114.042	0	NaN	0.965214	4.269	0.0230215	5.68316
1142	0	CAM	29.5818	-114.022	0	NaN	0.965214	4.269	0.0330096	5.68316
1143	0	CAM	29.5757	-114.002	0	NaN	0.965214	4.257	0.032632	5.68316
1144	0	CAM	29.5393	-113.954	0	NaN	0.94451	4.123	0.0283376	5.68316
1145	0	CAM	29.5199	-113.931	0	NaN	0.94451	4.123	0.0233425	5.55116
1146	0	CAM	29.509	-113.923	0	NaN	0.94451	4.123	0.0217968	5.55116
1147	1	CAM	29.4567	-113.839	0	NaN	0.94451	3.9375	0.0190795	5.55116
1148	0	CAM	29.3869	-113.755	0	NaN	0.94451	3.6825	0.0126244	4.50367
1149	0	CAM	29.3774	-113.743	0	NaN	0.94451	3.6825	0.0143712	4.50367
1150	0	CAM	29.3378	-113.705	0	NaN	0.94451	3.543	0.0151237	4.50367
1151	0	CAM	29.3191	-113.685	0	NaN	0.94451	3.389	0.0180306	4.50367
1152	0	CAM	29.2524	-113.632	0	NaN	0.94451	2.8265	0.0243973	4.53371
1153	1	CAM	29.2329	-113.643	0	NaN	0.94451	2.8265	0.0220817	4.53371
1154	1	CAM	29.0744	-113.552	0	NaN	0.94451	2.4385	0.0246313	4.56686
1155	1	CAM	29.0328	-113.554	0	NaN	0.94451	2.266	0.0291421	4.56686
1156	1	CAM	29.0155	-113.562	0	NaN	0.94451	2.266	0.0247026	4.56686
1157	1	CAM	29.0096	-113.563	0	NaN	0.94451	2.266	0.0232202	4.56686
1158	1	CAM	28.9817	-113.547	0	NaN	0.94451	2.266	0.0251698	4.56686
1159	1	CAM	28.4701	-113.037	0	NaN	0.872858	1.921	0.0206221	3.83372
1160	0	CAM	28.4593	-112.958	0	NaN	0.775773	1.826	0.0254763	3.07804
1161	0	CAM	28.4061	-112.859	0	NaN	0.775773	1.82	0.0198001	2.43125
1162	0	CAM	28.3218	-112.874	0	NaN	0.775773	1.814	0.0086466	2.43125
1163	1	CAM	28.3022	-112.871	0	NaN	0.775773	1.75	0.00963661	2.43125
1164	0	CAM	28.2903	-112.873	0	NaN	0.775773	1.75	0.00989505	2.43125
1165	0	CAM	28.2231	-112.817	0	NaN	0.645345	1.75	0.0147738	2.43125
1166	0	CAM	28.2161	-112.812	0	NaN	0.645345	1.75	0.0168279	2.43125
1167	0	CAM	28.1828	-112.797	0	NaN	0.645345	1.727	0.0165055	2.03525
1168	1	CAM	28.169	-112.8	0	NaN	0.645345	1.727	0.0142039	2.03525
1169	1	CAM	28.1103	-112.809	0	NaN	0.645345	1.719	0.0126505	2.03525
1170	1	CAM	28.0818	-112.8	0	NaN	0.645345	1.719	0.0133746	2.03525
1171	0	CAM	28.0019	-112.778	0	NaN	0.645345	1.6975	0.0218507	2.03525
1172	1	CAM	27.9934	-112.762	0	NaN	0.645345	1.6975	0.0238823	2.03525
1173	0	CAM	27.9276	-112.764	0	NaN	0.645345	1.6955	0.0210436	1.31282
1174	1	CAM	27.8794	-112.768	0	NaN	0.645345	1.6955	0.021237	1.31282
1175	1	CAM	27.8318	-112.74	0	NaN	0.645345	1.69	0.0204523	1.31282
1176	0	CAM	27.7717	-112.707	0	NaN	0.645345	1.694	0.0219041	1.31282
1177	1	CAM	27.7599	-112.705	0	NaN	0.645345	1.694	0.0208411	1.31282
1178	1	CAM	27.7054	-112.638	0	NaN	0.645345	1.697	0.0265508	1.31282
1179	1	CAM	27.6693	-112.602	0	NaN	0.645345	1.697	0.0289548	1.59556
1180	1	CAM	27.5795	-112.399	0	NaN	0.778034	1.719	0.0345523	1.27488
1181	0	CAM	27.5053	-112.328	0	NaN	0.778034	1.7135	0.0363887	1.27488
1182	1	CAM	27.4041	-112.299	0	NaN	0.778034	1.7225	0.0311687	1.72681
1183	0	CAM	27.3778	-112.295	0	NaN	0.778034	1.7225	0.0293631	1.72681
1184	1	CAM	27.3581	-112.271	0	NaN	0.778034	1.7225	0.0289495	1.72681
1185	0	CAM	27.3255	-112.243	0	NaN	0.778034	1.7225	0.03496	1.72681
1186	1	CAM	27.1908	-112.188	0	NaN	0.778034	1.727	0.0146121	1.40477
1187	1	CAM	27.1238	-112.055	0	NaN	0.778034	1.735	0.0161908	1.83349
1188	0	CAM	26.9004	-111.954	0	NaN	0.896988	1.7435	0.00640964	2.00703
1189	1	CAM	26.833	-111.874	0	NaN	0.896988	1.749	0.0106656	2.00703
1190	1	CAM	26.6628	-111.848	0	NaN	0.696502	1.763	NaN	2.64891
1191	1	CAM	26.6294	-111.815	0	NaN	0.696502	1.763	NaN	2.64891
1192	1	CAM	26.5628	-111.773	0	NaN	0.696502	1.763	NaN	2.64891
1193	1	CAM	26.5417	-111.743	0	NaN	0.696502	1.765	NaN	2.64891
1194	1	CAM	26.5465	-111.724	0	NaN	0.696502	1.763	NaN	2.64891
1195	0	CAM	26.5789	-111.682	0	NaN	0.696502	1.7685	0.00288697	2.64891
1196	0	CAM	26.8754	-111.792	0	NaN	0.896988	1.761	0.0286262	2.00703
1197	0	CAM	26.8284	-111.734	0	NaN	0.896988	1.761	0.0293832	2.00703
1198	1	CAM	26.7993	-111.707	0	NaN	0.896988	1.761	0.0354526	2.00703
1199	1	CAM	26.7878	-111.693	0	NaN	0.896988	1.765	0.0391524	1.67535
1200	0	CAM	26.7198	-111.609	0	NaN	0.696502	1.772	0.0385344	1.67535
1201	0	CAM	26.5484	-111.55	0	NaN	0.696502	1.774	0.0237487	2.54528
1202	0	CAM	26.5427	-111.538	0	NaN	0.696502	1.78	0.020248	2.54528
1203	0	CAM	26.5351	-111.511	0	NaN	0.696502	1.78	0.0241867	2.54528
1204	0	CAM	26.4272	-111.468	0	NaN	0.696502	1.78	0.0198462	3.12595
1205	1	CAM	26.4044	-111.464	0	NaN	0.696502	1.7825	0.0185172	3.12595
1206	1	CAM	26.3967	-111.456	0	NaN	0.696502	1.7825	0.0184673	3.12595
1207	1	CAM	26.2183	-111.379	0	NaN	0.696502	1.802	0.0136732	3.12595
1208	1	CAM	26.0773	-111.319	0	NaN	0.80705	1.818	0.012925	3.26147
1209	1	CAM	26.0489	-111.328	0	NaN	0.80705	1.8225	0.0116628	3.26147
1210	1	CAM	26.004	-111.335	0	NaN	0.80705	1.827	0.00574663	3.26147
1211	1	CAM	25.9455	-111.354	0	NaN	0.80705	1.827	0.0029023	3.26147
1212	1	CAM	25.893	-111.336	0	NaN	0.80705	1.8275	0.00387449	3.19029
1213	1	CAM	25.8722	-111.34	0	NaN	0.80705	1.828	0.00456669	3.19029
1214	0	CAM	25.744	-111.26	0	NaN	0.544375	1.844	0.00731908	3.19029
1215	1	CAM	25.682	-111.211	0	NaN	0.544375	1.846	0.0051549	2.64053
1216	1	CAM	25.5342	-111.125	0	NaN	0.544375	1.8545	0.0094499	2.64053
1217	1	CAM	25.525	-111.086	0	NaN	0.544375	1.8545	0.0142311	2.64053
1218	0	CAM	25.5139	-111.067	0	NaN	0.544375	1.8545	0.0178365	2.64053
1219	0	CAM	25.4524	-111.027	0	NaN	0.544375	1.8555	0.0217402	2.64053
1220	0	CAM	25.3321	-110.968	0	NaN	0.544375	1.8565	0.0365191	2.20233
1221	0	CAM	25.2617	-110.945	0	NaN	0.544375	1.858	0.0323584	2.20233
1222	1	CAM	25.1866	-110.909	0	NaN	0.544375	1.859	0.0216454	2.20233
1223	1	CAM	25.0759	-110.855	0	NaN	0.767245	1.859	0.0156055	2.3468
1224	1	CAM	24.9969	-110.759	0	NaN	0.767245	1.86	0.00649587	2.3468
1225	1	CAM	24.93	-110.72	0	NaN	0.767245	1.8595	0.00269803	2.32547
1226	1	CAM	24.8928	-110.693	0	NaN	0.767245	1.86	0.00564225	2.32547
1227	1	CAM	24.8636	-110.684	0	NaN	0.767245	1.86	0.00789859	2.32547
1228	1	CAM	24.7112	-110.689	0	NaN	0.656744	1.86	0.00918172	2.32547
1229	1	CAM	24.6354	-110.734	0	NaN	0.656744	1.86	0.011827	2.36725
1230	1	CAM	24.4467	-110.685	0	NaN	0.656744	1.862	0.00809157	2.36725
1231	1	CAM	24.3152	-110.641	0	NaN	0.656744	1.8645	0.00485473	2.35976
1232	1	CAM	24.2318	-110.577	0	NaN	0.656744	1.8585	0.00365567	2.35976
1233	0	CAM	24.1956	-110.506	0	NaN	0.656744	1.859	0.00210688	2.47358
1234	0	CAM	24.1213	-110.349	0	NaN	0.656744	1.854	0.00148109	2.47358
1235	0	CAM	24.3162	-110.234	0	NaN	0.907915	1.858	0.0182648	2.39173
1236	0	CAM	24.2616	-110.179	0	NaN	0.907915	1.858	0.0181608	2.44083
1237	0	CAM	24.2352	-110.137	0	NaN	0.907915	1.858	0.022784	2.44083
1238	1	CAM	24.2116	-110.083	0	NaN	0.907915	1.858	0.0153966	2.44083
1239	1	CAM	24.1714	-110.028	0	NaN	0.907915	1.855	0.012528	2.60045
1240	0	CAM	24.1299	-109.998	0	NaN	0.907915	1.855	0.0101261	2.60045
1241	1	CAM	24.1099	-109.994	0	NaN	0.907915	1.855	0.00843493	2.60045
1242	0	CAM	24.0296	-109.933	0	NaN	0.969233	1.854	0.019936	2.60045
1243	1	CAM	23.9038	-109.811	0	NaN	0.969233	1.857	0.0364875	2.75425
1244	1	CAM	23.8638	-109.761	0	NaN	0.969233	1.857	0.0520745	2.75425
1245	1	CAM	23.8391	-109.735	0	NaN	0.969233	1.857	0.055167	2.75425
1246	0	CAM	23.7651	-109.711	0	NaN	0.969233	1.857	0.0488943	2.75425
1247	1	CAM	23.7042	-109.7	0	NaN	0.951842	1.857	0.0487551	2.75374
1248	0	CAM	23.6946	-109.697	0	NaN	0.951842	1.857	0.045093	2.75374
1249	0	CAM	23.6715	-109.698	0	NaN	0.951842	1.857	0.0144235	2.85874
1250	1	CAM	23.6576	-109.691	0	NaN	0.951842	1.857	0.0053289	2.85874
1251	1	CAM	23.6199	-109.608	0	NaN	0.951842	1.858	0.0410468	2.85874
1252	0	CAM	23.5974	-109.567	0	NaN	0.951842	1.8575	0.0591253	2.85874
1253	1	CAM	23.3792	-109.43	0	NaN	0.951842	1.857	0.0647439	2.87821
1254	1	CAM	23.2888	-109.433	0	NaN	0.951842	1.856	0.0591335	2.87821
1255	0	CAM	23.2196	-109.451	0	NaN	1.40995	1.856	0.0545848	2.87821
1256	0	CAM	23.1446	-109.505	0	NaN	1.40995	1.856	0.0360516	2.67668
1257	0	CAM	23.0995	-109.557	0	NaN	1.40995	1.856	0.0206533	2.67668
1258	0	CAM	23.0816	-109.603	0	NaN	1.40995	1.856	0.02045	2.67668
1259	0	CAM	23.0489	-109.681	0	NaN	1.40995	1.857	0.0268088	2.67668
1260	0	CAM	22.9747	-109.775	0	NaN	1.63275	1.859	0.0430972	2.58994
1261	0	CAM	22.9597	-109.799	0	NaN	1.63275	1.8595	0.0440399	2.58994
1262	0	CAM	22.8907	-109.9	0	NaN	1.63275	1.8615	0.0663684	2.58994
1263	0	CAM	23.0487	-110.106	0	NaN	1.63275	1.884	0.0363064	2.93656
1264	0	CAM	23.1126	-110.12	0	NaN	1.63275	1.8885	0.0363961	2.93656
1265	0	CAM	23.1884	-110.142	0	NaN	1.63275	1.8885	0.0389484	2.93953
1266	1	CAM	23.2307	-110.153	0	NaN	1.63275	1.893	0.0352228	2.93953
1267	1	CAM	23.2744	-110.158	0	NaN	1.63275	1.902	0.0328686	2.93953
1268	1	CAM	23.3689	-110.205	0	NaN	1.65267	1.922	0.0316493	2.90162
1269	1	CAM	23.512	-110.289	0	NaN	1.65267	1.945	0.0181437	2.76435
1270	0	CAM	23.5879	-110.366	0	NaN	1.65267	1.948	0.0116219	2.76435
1271	0	CAM	23.7683	-110.683	0	NaN	1.65267	1.9685	0.00585419	2.65576
1272	0	CAM	23.8384	-110.749	0	NaN	1.55187	1.962	0.00629565	2.50911
1273	0	CAM	23.8938	-110.801	0	NaN	1.55187	1.9685	0.00668623	2.50911
1274	0	CAM	23.9383	-110.847	0	NaN	1.55187	1.971	0.0066522	2.50911
1275	0	CAM	24.0519	-110.978	0	NaN	1.55187	2.0015	0.00734658	2.54874
1276	1	CAM	24.0715	-111.007	0	NaN	1.55187	2.0015	0.00803975	2.54874
1277	0	CAM	24.1775	-111.163	0	NaN	1.55187	2.016	0.00769152	2.54874
1278	0	CAM	24.2425	-111.275	0	NaN	1.94413	2.029	0.00668362	2.73932
1279	1	CAM	24.406	-111.559	0	NaN	1.94413	2.056	0.00435021	2.88645
1280	1	CAM	25.1876	-112.126	0	NaN	2.18618	2.154	0.00200049	3.46176
1281	1	CAM	25.4679	-112.091	1	975	1.8876	2.178	0.00222814	3.45116
1282	1	CAM	25.7469	-112.101	0	NaN	1.8876	2.201	0.00184396	3.34515
1283	0	CAM	25.8076	-112.122	0	NaN	1.43876	2.201	0.0016909	3.34515
1284	0	CAM	25.9236	-112.17	0	NaN	1.43876	2.207	0.00174256	3.34515
1285	0	CAM	26.0592	-112.281	0	NaN	1.43876	2.217	0.00221304	2.98092
1286	0	CAM	26.2143	-112.377	0	NaN	1.43876	2.212	0.00242216	2.98092
1287	0	CAM	26.2841	-112.581	0	NaN	1.43876	2.207	0.00310831	2.90569
1288	1	CAM	26.3063	-112.617	0	NaN	1.43876	2.207	0.00309729	2.90569
1289	1	CAM	26.3945	-112.769	0	NaN	1.30137	2.207	0.00285944	2.97961
1290	0	CAM	27.0978	-114.105	0	NaN	1.51487	2.1585	0.00366799	2.8701
1291	0	CAM	27.482	-114.613	0	NaN	2.07741	2.1605	0.0039726	2.94142
1292	0	CAM	27.5006	-114.655	0	NaN	2.07741	2.1605	0.0049085	2.94142
1293	0	CAM	27.729	-114.987	0	NaN	2.07741	2.169	0.0177712	3.74732
1294	0	CAM	27.7821	-114.474	0	NaN	1.17599	2.322	0.00139001	3.90528
1295	0	CAM	27.8026	-114.432	0	NaN	1.17599	2.3415	0.00111587	3.86722
1296	0	CAM	28.3329	-114.087	1	972	1.48283	2.347	0.00229259	4.4101
1297	1	CAM	28.4965	-114.069	0	NaN	1.48283	2.347	0.00270942	4.44491
1298	0	CAM	28.6661	-114.224	0	NaN	1.48283	2.33	0.00358914	3.97962
1299	0	CAM	28.7042	-114.283	0	NaN	1.48283	2.33	0.00403272	3.31695
1300	0	CAM	28.8041	-114.366	0	NaN	1.48283	2.307	0.00410132	3.31695
1301	0	CAM	28.9049	-114.448	0	NaN	1.48283	2.2995	0.00430454	2.47814
1302	0	CAM	29.0248	-114.59	0	NaN	2.14995	2.2855	0.00403098	1.78505
1303	0	CAM	29.0716	-114.62	0	NaN	2.14995	2.292	0.00401434	1.78505
1304	0	CAM	29.1135	-114.676	0	NaN	2.14995	2.2855	0.0041988	1.58778
1305	0	CAM	29.1659	-114.738	0	NaN	2.14995	2.269	0.0040151	1.58778
1306	0	CAM	29.285	-114.874	0	NaN	2.14995	2.245	0.00390664	2.12161
1307	0	CAM	29.4213	-115.108	0	NaN	2.13094	2.237	0.00348147	2.7908
1308	0	CAM	29.7193	-115.649	0	NaN	2.13094	2.206	0.00856175	3.3454
1309	0	CAM	30.0434	-115.789	0	NaN	2.62456	2.203	0.00798313	2.30659
1310	0	CAM	30.3154	-115.823	0	NaN	2.62456	2.203	0.0028928	2.24941
1311	1	CAM	30.4429	-115.943	0	NaN	2.62456	2.204	0.00442103	2.35871
1312	1	CAM	30.7121	-116.041	0	NaN	2.88378	2.205	0.00189759	3.21045
1313	0	CAM	30.9398	-116.249	0	NaN	2.62475	2.2055	0.00356154	3.1265
1314	0	CAM	30.9682	-116.273	0	NaN	2.62475	2.206	0.003475	3.13323
1315	0	CAM	31.2621	-116.378	0	NaN	2.62475	2.21	0.00330701	2.66386
1316	0	CAM	23.0453	-81.5705	0	NaN	1.28526	0.5975	0.0199502	3.62781
1317	0	CAM	23.0474	-81.5007	0	NaN	1.28526	0.599	0.025461	3.62781
1318	1	CAM	22.9118	-80.0077	1	477	0.833807	0.516	0.00232339	4.0713
1319	1	CAM	22.7616	-79.6514	0	NaN	1.08266	0.497	0.00700944	3.73005
1320	1	CAM	20.7685	-75.6261	0	NaN	1.4936	0.69	0.0198204	3.93813
1321	0	CAM	20.7147	-75.2509	0	NaN	1.4936	0.6855	0.040391	3.99768
1322	0	CAM	20.5768	-74.7332	0	NaN	1.58087	0.672	0.0600325	4.00738
1323	0	CAM	20.5543	-74.7137	0	NaN	1.58087	0.672	0.0554416	4.00738
1324	1	CAM	20.3914	-74.5291	1	478	1.58087	0.6225	0.0436538	4.14399
1325	0	CAM	20.3021	-74.2975	0	NaN	1.58087	0.611	0.0533	3.92105
1326	0	CAM	20.0614	-74.5314	0	NaN	1.09593	0.5645	0.0996679	4.21102
1327	0	CAM	20.0423	-74.8072	0	NaN	1.09593	0.537	0.108778	3.93734
1328	0	CAM	19.9699	-74.9562	0	NaN	1.09593	0.531	0.102888	3.75719
1329	1	CAM	19.9127	-75.1951	1	476	1.21339	0.505	0.141423	3.61495
1330	0	CAM	19.9022	-75.4467	0	NaN	1.16496	0.4915	0.135941	3.55711
1331	1	CAM	19.9618	-76.4322	0	NaN	1.37094	0.452	0.242403	3.3564
1332	1	CAM	19.9491	-76.5172	0	NaN	1.37094	0.449	0.245132	3.15881
1333	0	CAM	19.9466	-76.7576	0	NaN	1.41378	0.441	0.248841	3.05279
1334	1	CAM	20.5495	-77.2462	1	474	0.2569	0.701	0.00011522	3.36277
1335	1	CAM	21.6127	-79.5345	0	NaN	0.400914	0.396	0.000644631	4.00321
1336	1	CAM	21.6696	-79.8271	0	NaN	0.726024	0.385	0.0506412	4.00882
1337	1	CAM	22.1024	-80.4082	0	NaN	0.611929	0.371	0.0654256	NaN
1338	0	CAM	22.1772	-80.5425	1	475	0.611929	0.37	0.0400194	4.15799
1339	1	CAM	22.0849	-83.9722	0	NaN	0.63574	0.362	0.0330175	3.55376
1340	1	CAM	17.8752	-76.4188	0	NaN	2.18002	0.438	0.0569217	3.36375
1341	1	CAM	17.8687	-76.5955	0	NaN	2.18002	0.4375	0.0485377	3.50702
1342	1	CAM	17.7776	-77.2868	1	506	1.85328	0.4385	0.000199546	3.36771
1343	0	CAM	18.274	-76.7831	0	NaN	1.33504	0.4275	0.0645787	3.63603
1344	0	CAM	18.2286	-76.6233	0	NaN	1.74143	0.433	0.0719056	3.46079
1345	0	CAM	18.2047	-76.5701	0	NaN	1.74143	0.4335	0.0711748	3.46079
1346	0	CAM	18.2021	-76.5104	1	504	1.74143	0.435	0.0826046	3.44137
1347	0	CAM	18.398	-68.8973	0	NaN	1.37187	0.4315	0.0313348	3.38593
1348	0	CAM	18.3942	-69.084	0	NaN	1.37187	0.4315	0.0347245	3.39265
1349	0	CAM	18.4516	-69.2048	0	NaN	1.37187	0.43	0.0175818	3.42134
1350	0	CAM	18.4489	-69.3124	0	NaN	1.43542	0.4305	0.0299456	3.42134
1351	0	CAM	18.4663	-69.8835	0	NaN	1.46094	0.43	0.041127	3.47548
1352	0	CAM	18.4151	-70.0177	0	NaN	1.46094	0.433	0.0403785	3.44695
1353	0	CAM	18.3708	-70.0507	0	NaN	1.46094	0.4335	0.0377574	3.44695
1354	1	CAM	18.2321	-70.1815	0	NaN	1.46094	0.435	0.0280523	3.44695
1355	0	CAM	18.2295	-70.3028	0	NaN	1.42488	0.436	0.0256821	3.3038
1356	1	CAM	18.2707	-70.5857	0	NaN	1.42488	0.438	0.0464957	3.2302
1357	0	CAM	17.9911	-71.1603	0	NaN	1.45702	0.4405	0.121475	2.7295
1358	0	CAM	18.2338	-72.1055	0	NaN	0.883648	0.448	0.149256	2.23708
1359	1	CAM	18.2259	-72.2834	0	NaN	1.34543	0.448	0.163577	2.44566
1360	1	CAM	18.2221	-72.295	0	NaN	1.34543	0.448	0.161219	2.44566
1361	0	CAM	18.2317	-72.5425	0	NaN	1.34543	0.448	0.138738	2.80072
1362	1	CAM	18.19	-72.6378	0	NaN	1.34543	0.448	0.119214	2.80072
1363	0	CAM	18.1857	-72.6682	0	NaN	1.34543	0.448	0.109253	2.80072
1364	1	CAM	18.1814	-72.7009	0	NaN	1.34543	0.448	0.100407	3.19051
1365	1	CAM	18.179	-72.7566	0	NaN	1.5881	0.448	0.103325	3.19051
1366	0	CAM	18.1668	-72.9504	0	NaN	1.5881	0.448	0.0922869	3.49033
1367	0	CAM	18.2378	-73.6852	0	NaN	1.56871	0.449	0.00177038	3.70214
1368	1	CAM	18.1803	-73.7577	0	NaN	1.74785	0.449	0.00797474	3.66166
1369	1	CAM	18.1589	-73.8031	0	NaN	1.74785	0.449	0.0133398	3.66166
1370	1	CAM	18.1155	-73.8417	0	NaN	1.74785	0.449	0.0495614	3.66166
1371	1	CAM	18.2503	-74.1053	0	NaN	1.74785	0.451	0.104945	3.50644
1372	1	CAM	18.3	-74.2177	0	NaN	1.09993	0.4535	0.102007	3.34372
1373	1	CAM	18.3298	-74.3995	0	NaN	1.09993	0.455	0.0736341	3.34372
1374	0	CAM	18.6328	-74.1025	0	NaN	1.03079	0.528	0.104545	3.41432
1375	1	CAM	18.6172	-74.0793	0	NaN	1.03079	0.5265	0.096079	3.41432
1376	0	CAM	18.6036	-74.0328	0	NaN	1.03079	0.535	0.0894635	3.41432
1377	1	CAM	18.4884	-73.3022	0	NaN	0.219427	0.548	0.0386955	3.24872
1378	0	CAM	18.4339	-72.7664	0	NaN	0.219427	0.448	0.0440886	3.15772
1379	0	CAM	18.4261	-72.7264	0	NaN	0.219427	0.448	0.0359484	3.15772
1380	1	CAM	18.5652	-72.5686	0	NaN	0.219427	0.562	0.00980443	2.98586
1381	1	CAM	18.6271	-72.3589	0	NaN	1.34543	0.562	0.000686889	2.94108
1382	1	CAM	18.801	-72.5619	0	NaN	0.327697	0.562	0.0117601	2.94813
1383	1	CAM	19.2384	-72.7816	1	495	0.327697	0.561	0.046477	2.83061
1384	1	CAM	19.9071	-73.1984	0	NaN	1.5312	0.6125	0.0640885	3.05013
1385	1	CAM	19.9414	-72.858	0	NaN	1.5312	0.634	0.0120037	3.28427
1386	1	CAM	19.9272	-72.6975	0	NaN	1.64658	0.637	0.018239	3.22817
1387	0	CAM	19.8477	-72.5255	0	NaN	1.64658	0.642	0.0325721	3.31508
1388	0	CAM	19.823	-72.4335	0	NaN	1.64658	0.643	0.0371235	3.31508
1389	0	CAM	19.8065	-72.3929	0	NaN	1.64658	0.644	0.036913	3.30579
1390	1	CAM	19.8402	-71.6869	1	479	1.7167	0.647	0.00311308	3.12671
1391	0	CAM	19.8774	-71.085	0	NaN	1.87144	0.642	0.0376943	2.87615
1392	0	CAM	19.7101	-70.3691	0	NaN	1.96205	0.631	0.0440668	3.09832
1393	1	CAM	19.1099	-69.6257	1	481	1.94557	0.614	8.42073e-05	3.68353
1394	0	CAM	18.4762	-66.2558	1	461	1.94988	0.571	0.0483619	3.76341
1395	0	CAM	18.439	-65.8775	1	462	1.94988	0.5605	0.0352906	3.70519
1396	1	EAS	21.5994	108.195	0	NaN	0.704746	4.007	0.000196518	3.30171
1397	0	EAS	21.6752	108.319	0	NaN	0.704746	4.007	0.000112031	3.26525
1398	1	EAS	21.6763	108.351	0	NaN	0.704746	4.007	0.000121033	3.26525
1399	0	EAS	21.8406	108.477	0	NaN	0.704746	4.036	0.000119344	3.3917
1400	1	EAS	21.8471	108.593	0	NaN	0.704746	4.036	0.000108251	3.42633
1401	0	EAS	21.769	108.858	0	NaN	0.686295	4.044	0.000116078	3.46506
1402	1	EAS	21.605	109.014	1	225	0.686295	4.0115	0.00036494	3.33348
1403	0	EAS	21.4517	109.237	0	NaN	0.686295	3.987	0.000518191	3.13177
1404	0	EAS	21.4674	109.334	0	NaN	0.476195	4.044	0.000405262	3.15014
1405	0	EAS	21.4841	109.474	0	NaN	0.476195	4.05	0.000322579	3.15014
1406	1	EAS	21.5847	109.647	0	NaN	0.476195	4.1455	0.000114861	3.44597
1407	1	EAS	21.5506	109.757	0	NaN	0.476195	4.186	0.000161696	3.44597
1408	1	EAS	21.4541	109.898	0	NaN	0.476195	4.1455	9.08026e-05	2.89133
1409	0	EAS	21.3636	109.904	0	NaN	0.476195	3.801	0.000213394	2.89133
1410	0	EAS	20.3658	109.979	0	NaN	0.363689	3.683	0.000539249	0.92493
1411	1	EAS	20.0824	110.376	1	224	0.321379	2.771	0.00178091	1.23142
1412	0	EAS	19.9905	109.733	0	NaN	0.648353	3.8025	0.00156424	1.14929
1413	1	EAS	19.7724	109.276	0	NaN	0.648353	3.76	0.00103192	1.7254
1414	1	EAS	19.6432	109.151	0	NaN	1.13065	3.7015	0.00123181	2.05669
1415	0	EAS	19.5105	108.934	0	NaN	1.32752	3.614	0.00153605	2.25912
1416	1	EAS	19.3161	108.655	1	206	1.32752	3.4	0.00165765	2.51232
1417	0	EAS	19.1567	108.67	0	NaN	1.00569	3.27	0.0008608	2.45902
1418	1	EAS	19.0686	108.625	0	NaN	1.00569	3.167	0.000854438	2.45902
1419	1	EAS	18.9678	108.645	0	NaN	1.00569	3.013	0.00074365	2.45902
1420	1	EAS	18.8674	108.633	0	NaN	1.00569	2.785	0.000758904	2.41454
1421	1	EAS	18.7528	108.684	0	NaN	1.00569	2.34	0.0005889	2.41454
1422	1	EAS	18.6424	108.698	0	NaN	1.02084	1.817	0.00071533	2.44056
1423	1	EAS	18.4368	108.852	0	NaN	1.02084	1.749	0.00100496	2.37139
1424	0	EAS	18.4039	108.953	0	NaN	1.54862	1.708	0.0010086	2.37139
1425	1	EAS	18.3438	109.131	0	NaN	1.54862	1.749	0.00103467	2.28228
1426	0	EAS	18.2345	109.497	0	NaN	1.84222	1.823	0.00218895	2.28587
1427	0	EAS	18.3846	109.762	0	NaN	2.26654	1.9155	0.00207384	2.57017
1428	0	EAS	18.4981	110.091	0	NaN	2.2262	1.9045	0.00285895	2.77872
1429	0	EAS	19.1512	110.583	0	NaN	2.52901	1.962	0.00204096	3.1309
1430	0	EAS	18.7422	110.452	0	NaN	2.2262	1.9005	0.00328087	2.97354
1431	1	EAS	19.6114	110.853	0	NaN	2.28949	2.0795	0.00154486	2.86104
1432	0	EAS	19.6864	111.012	0	NaN	2.28949	2.148	0.00221432	2.86104
1433	1	EAS	20.0165	110.602	0	NaN	2.02288	2.528	0.00072884	1.28751
1434	1	EAS	19.9311	110.612	0	NaN	2.02288	2.463	0.000323581	1.28751
1435	0	EAS	19.9251	110.605	0	NaN	2.02288	2.463	0.000350448	2.15453
1436	0	EAS	19.9557	110.588	0	NaN	2.02288	2.587	0.000433309	1.28751
1437	0	EAS	20.8501	110.194	0	NaN	0.685078	3.26	0.00029702	1.24516
1438	1	EAS	21.0167	110.225	0	NaN	0.685078	3.392	0.000288629	1.43744
1439	0	EAS	21.3903	110.387	0	NaN	0.685078	3.392	5.64139e-05	2.26363
1440	1	EAS	21.38	110.747	1	215	0.685078	3.26	0.00055716	2.09088
1441	0	EAS	21.5065	111.2	0	NaN	0.917805	3.2595	0.000493936	2.29669
1442	1	EAS	21.547	111.451	0	NaN	0.917805	3.173	0.000886197	3.05925
1443	0	EAS	21.7285	111.737	0	NaN	0.917805	3.1135	0.000242766	3.31465
1444	1	EAS	21.7557	111.718	0	NaN	0.917805	3.136	0.00013182	3.31465
1445	1	EAS	21.7788	112.063	1	223	1.09837	2.9925	0.00042227	3.21104
1446	0	EAS	21.7878	112.196	0	NaN	1.09837	2.9495	0.000407642	3.21104
1447	0	EAS	21.8162	112.421	0	NaN	1.37328	2.719	0.000176936	3.03167
1448	0	EAS	21.9528	112.829	0	NaN	0.47307	2.592	0.000210732	2.67946
1449	1	EAS	22.5559	113.628	2	228, 235	0.942442	2.128	0.000201136	2.92324
1450	1	EAS	22.8949	113.574	0	NaN	NaN	NaN	0.000142765	3.03513
1451	0	EAS	22.7808	115.046	0	NaN	1.35423	1.879	0.000613712	2.98838
1452	0	EAS	22.8192	115.251	0	NaN	1.63216	1.813	0.000629371	2.92343
1453	0	EAS	22.8589	115.611	0	NaN	1.63216	1.708	0.000431329	2.76518
1454	0	EAS	22.8761	115.662	0	NaN	1.63216	1.7065	0.000474053	2.76518
1455	0	EAS	22.9621	116.315	0	NaN	1.29407	1.6455	0.00117492	2.65358
1456	0	EAS	23.005	116.54	0	NaN	1.29407	1.6425	0.00129117	2.9619
1457	0	EAS	23.1904	116.603	0	NaN	1.29407	1.834	0.000850501	3.12035
1458	0	EAS	23.4017	116.551	0	NaN	1.29407	1.9395	8.37486e-05	3.12035
1459	1	EAS	23.4544	116.873	1	212	0.507979	2.225	0.000491417	3.11451
1460	0	EAS	23.6219	117.033	0	NaN	0.507979	2.344	0.000281496	3.11451
1461	1	EAS	23.6517	117.236	0	NaN	0.507979	2.493	0.000555323	2.88798
1462	0	EAS	23.9363	117.419	0	NaN	1.29476	2.9465	0.000168527	2.87766
1463	0	EAS	24.0264	117.715	0	NaN	1.42033	3.117	0.000677617	3.93511
1464	0	EAS	24.0162	117.755	0	NaN	1.42033	3.202	0.000825753	3.93511
1465	1	EAS	24.4323	117.92	1	218	1.42033	3.384	0.000230055	4.09282
1466	0	EAS	24.6548	118.184	0	NaN	1.73398	3.5275	0.000166461	4.45642
1467	0	EAS	24.8483	118.649	1	217	1.73398	3.575	0.000429025	3.74424
1468	0	EAS	25.244	118.894	0	NaN	1.49829	3.8205	0.000275345	2.73628
1469	0	EAS	25.3898	119.139	0	NaN	0.658792	3.8205	0.0002206	2.48591
1470	0	EAS	25.4692	119.22	0	NaN	0.658792	3.8585	0.000227332	2.48591
1471	0	EAS	25.6661	119.473	0	NaN	0.658792	3.763	0.00018681	2.57455
1472	0	EAS	25.838	119.61	0	NaN	0.658792	3.734	0.000598563	2.63901
1473	0	EAS	22.456	120.946	0	NaN	2.02895	1.635	0.0508543	2.95995
1474	1	EAS	22.5266	120.97	0	NaN	2.02895	1.635	0.0478924	3.04868
1475	1	EAS	22.5902	121.009	0	NaN	2.02895	1.64	0.04018	3.04868
1476	1	EAS	22.6822	121.064	0	NaN	2.02895	1.658	0.0442612	3.04868
1477	1	EAS	22.7063	121.104	0	NaN	2.02895	1.662	0.0468312	2.82899
1478	1	EAS	22.7673	121.177	1	430	2.02895	1.667	0.0500263	2.82899
1479	1	EAS	23.1346	121.4	0	NaN	2.03637	1.6835	0.0581395	2.73186
1480	0	EAS	23.4659	121.503	1	423	2.03637	1.686	0.0693198	2.58787
1481	0	EAS	23.5981	121.529	0	NaN	2.74666	1.686	0.0914099	2.62189
1482	0	EAS	23.9413	121.61	1	424	2.46654	1.686	0.11271	2.65468
1483	1	EAS	24.1386	121.664	0	NaN	2.46654	1.682	0.0921882	2.65468
1484	1	EAS	24.3109	121.773	1	421	2.22933	1.678	0.101421	3.27729
1485	1	EAS	24.4456	121.814	0	NaN	2.22933	1.677	0.102453	3.35941
1486	1	EAS	24.7146	121.835	1	426	2.22933	1.658	0.00632769	3.37036
1487	0	EAS	25.0202	121.947	0	NaN	2.3489	1.65	0.0143338	3.32514
1488	0	EAS	25.1734	121.418	1	434	2.69726	1.658	0.00305062	2.33926
1489	0	EAS	25.1199	121.248	0	NaN	1.90763	1.995	0.00331656	1.7119
1490	0	EAS	24.9096	120.969	0	NaN	1.90763	2.864	0.00309746	1.57256
1491	0	EAS	24.8533	120.93	1	435	1.90763	3.032	0.00306465	1.57256
1492	0	EAS	24.6712	120.828	0	NaN	1.8828	3.153	0.002626	1.5922
1493	0	EAS	24.618	120.755	1	422	1.8828	3.1645	0.00258466	1.54007
1494	1	EAS	24.4111	120.596	1	432	1.8828	3.2935	0.00224198	1.50592
1495	1	EAS	24.3384	120.554	1	433	1.8828	3.293	0.00204661	1.8073
1496	0	EAS	24.1989	120.487	1	438	1.8828	3.293	0.00160565	2.0835
1497	1	EAS	23.8464	120.241	1	419	2.20964	3.267	0.000987749	2.85976
1498	0	EAS	23.5173	120.16	1	429	1.59698	2.636	0.000847618	2.97174
1499	0	EAS	23.4518	120.156	1	431	1.59698	2.381	0.00100401	2.97174
1500	0	EAS	23.3273	120.116	1	428	1.59698	1.647	0.00203487	2.82168
1501	0	EAS	23.2972	120.104	1	418	1.59698	1.626	0.00252605	2.82168
1502	1	EAS	23.0453	120.063	1	436	1.27313	1.272	0.00489914	2.51769
1503	0	EAS	22.9964	120.139	1	439	1.27313	1.272	0.00399887	2.51769
1504	1	EAS	22.9129	120.175	1	420	1.27313	1.235	0.00453285	2.25897
1505	0	EAS	22.8033	120.214	0	NaN	1.27313	1.24	0.00548451	2.25897
1506	0	EAS	22.7183	120.256	0	NaN	1.40951	1.235	0.0066772	2.1294
1507	0	EAS	22.7137	120.257	0	NaN	1.40951	1.235	0.00709349	2.1294
1508	0	EAS	22.4834	120.421	1	425	1.40951	1.251	0.00604939	2.21801
1509	0	EAS	22.467	120.436	1	437	1.40951	1.251	0.00570369	2.21801
1510	0	EAS	22.4124	120.513	1	427	1.78812	1.288	0.00949242	2.22676
1511	1	EAS	22.2541	120.649	0	NaN	1.78812	1.442	0.0154553	2.56005
1512	1	EAS	22.194	120.685	0	NaN	1.78812	1.4495	0.0190035	2.56005
1513	0	EAS	22.0635	120.707	0	NaN	1.78812	1.388	0.0167278	2.58699
1514	1	EAS	25.9791	119.447	1	222	0.658792	3.7995	5.80542e-05	NaN
1515	0	EAS	26.2588	119.634	0	NaN	1.1164	3.733	0.00033397	2.53132
1516	0	EAS	26.4703	119.602	0	NaN	1.1164	3.714	0.000173301	2.55334
1517	0	EAS	26.7861	119.583	0	NaN	1.1164	3.787	0.000131956	2.59011
1518	0	EAS	26.8036	119.697	1	216	1.1164	3.738	0.000239733	2.59011
1519	0	EAS	26.8461	119.842	0	NaN	1.1164	3.695	0.000163671	2.67742
1520	0	EAS	26.9698	120.193	0	NaN	1.23248	3.635	0.000393827	2.87719
1521	0	EAS	27.2094	120.184	0	NaN	1.23248	3.7745	6.96178e-05	NaN
1522	0	EAS	27.2973	120.248	0	NaN	1.23248	3.8815	NaN	NaN
1523	0	EAS	27.2872	120.322	0	NaN	1.23248	3.7745	0.000325833	3.02641
1524	0	EAS	27.5879	120.605	0	NaN	1.12596	3.8815	0.000156097	3.00308
1525	0	EAS	27.6964	120.7	0	NaN	1.12596	3.984	0.000202935	3.00308
1526	1	EAS	27.9348	120.885	1	226	0.379121	4.034	0.00016092	3.14866
1527	0	EAS	28.1225	121.039	0	NaN	0.379121	4.088	0.000252348	3.56049
1528	0	EAS	28.4997	121.611	0	NaN	1.41384	3.9965	0.00026043	3.66908
1529	0	EAS	28.672	121.533	0	NaN	1.41384	4.1185	0.00011084	3.42967
1530	0	EAS	29.1188	121.554	0	NaN	0.810255	4.172	0.000117803	3.11704
1531	0	EAS	29.2592	121.566	0	NaN	0.76848	4.153	9.77505e-05	3.64467
1532	0	EAS	29.3039	121.657	0	NaN	0.76848	4.079	9.75471e-05	3.64467
1533	0	EAS	29.688	121.838	0	NaN	0.76848	3.6545	0.000308822	3.62726
1534	0	EAS	29.9751	121.754	0	NaN	0.843863	3.03	0.000488132	2.7158
1535	0	EAS	30.2295	120.741	0	NaN	NaN	3.1415	0.000267442	2.97187
1536	0	EAS	30.3822	120.665	1	227	NaN	2.959	0.000101646	2.97187
1537	1	EAS	31.4023	121.996	1	207	0.673939	3.325	0.00034477	1.72578
1538	1	EAS	34.4833	119.802	1	210	0.894493	2.153	0.00063282	7.57434
1539	1	EAS	34.9178	119.2	0	NaN	0.887665	2.425	0.00065401	2.77188
1540	0	EAS	35.265	119.406	0	NaN	0.887665	2.429	0.00120667	4.10153
1541	1	EAS	35.2883	119.455	0	NaN	0.887665	2.429	0.00152743	4.10153
1542	0	EAS	35.5642	119.648	0	NaN	1.01812	2.429	0.00108748	5.68536
1543	0	EAS	35.5898	119.661	0	NaN	1.01812	2.425	0.00104503	5.68536
1544	0	EAS	36.13	120.113	0	NaN	0.845645	2.885	0.000357535	7.44195
1545	0	EAS	36.1731	120.132	0	NaN	0.845645	2.918	0.000339044	7.44195
1546	1	EAS	36.3937	120.694	0	NaN	0.640686	2.914	0.000480875	8.09102
1547	0	EAS	36.614	120.846	0	NaN	0.640686	2.914	0.000160337	6.80708
1548	1	EAS	36.7165	121.36	0	NaN	0.973158	2.747	0.000763703	4.47882
1549	0	EAS	36.7927	121.476	0	NaN	0.973158	2.733	0.000634494	4.47882
1550	1	EAS	36.8951	121.805	0	NaN	1.16832	2.475	0.000390162	3.77989
1551	1	EAS	36.9099	121.854	0	NaN	1.16832	2.4435	0.000405181	3.43939
1552	1	EAS	36.929	121.968	0	NaN	1.16832	2.3565	0.000454273	3.43939
1553	0	EAS	36.9414	122.138	0	NaN	1.00494	2.28	0.000437763	3.58141
1554	0	EAS	37.4425	121.548	0	NaN	0.904505	1.4875	0.00067462	3.64324
1555	0	EAS	37.5766	121.299	0	NaN	0.904505	1.482	0.000679955	4.28383
1556	0	EAS	37.7094	120.397	0	NaN	1.18633	0.823	0.000658234	4.57081
1557	0	EAS	37.1189	119.574	1	231	0.821089	0.887	0.000525572	4.73736
1558	0	EAS	37.1128	119.48	0	NaN	0.821089	0.879	0.000665827	4.73736
1559	0	EAS	37.2803	118.991	1	233	0.821089	0.8975	0.000750971	4.08245
1560	1	EAS	37.8122	119.245	3	214, 221, 229	0.821273	0.8365	0.000687012	4.70363
1561	0	EAS	38.9639	117.724	1	211	0.559683	1.124	0.000481331	4.50471
1562	0	EAS	39.1638	118.604	0	NaN	0.689738	0.8745	0.000288501	4.23942
1563	1	EAS	39.4294	119.305	1	220	0.845062	0.814	0.000645818	3.33337
1564	0	EAS	39.6793	119.329	0	NaN	0.845062	0.816	0.000411098	3.00395
1565	0	EAS	39.7792	119.413	0	NaN	0.845062	0.823	0.000495174	2.74863
1566	0	EAS	39.8008	119.443	0	NaN	0.845062	0.823	0.000551462	2.74863
1567	0	EAS	39.909	119.571	0	NaN	0.845062	0.8245	0.000613678	2.74863
1568	0	EAS	40.1519	120.266	0	NaN	1.02817	0.842	0.000542511	1.63817
1569	1	EAS	40.2603	120.515	0	NaN	1.02817	0.8845	0.000475123	2.41259
1570	0	EAS	40.5887	120.779	0	NaN	0.768742	0.925	0.000319526	3.82705
1571	0	EAS	40.7391	120.973	0	NaN	0.768742	0.951	0.000245775	4.12104
1572	1	EAS	40.8967	121.263	1	232	0.774819	0.977	0.000152208	5.07483
1573	0	EAS	40.8572	121.552	1	208	0.774819	0.982	0.00014652	6.14149
1574	0	EAS	40.908	121.81	0	NaN	0.564112	0.9875	0.000163504	6.77529
1575	0	EAS	40.6788	122.156	1	219	0.564112	0.989	0.000910937	6.2058
1576	1	EAS	40.4672	122.282	0	NaN	0.564112	0.9925	0.000762378	7.29359
1577	0	EAS	39.6602	121.492	0	NaN	0.614095	0.925	0.000912973	4.76984
1578	0	EAS	39.316	122.261	0	NaN	1.03586	3.002	0.000447877	3.75171
1579	0	EAS	39.417	122.406	0	NaN	1.03586	3.177	0.000463619	3.82027
1580	0	EAS	39.4554	122.569	0	NaN	0.705154	3.3185	0.00049597	4.21237
1581	0	EAS	39.667	123.005	0	NaN	0.705154	3.457	0.000230428	3.86643
1582	1	EAS	39.7426	123.235	0	NaN	0.705154	3.499	0.000349455	3.55486
1583	0	EAS	39.7549	123.3	0	NaN	1.09193	3.503	0.000321299	3.55486
1584	0	EAS	39.8247	123.653	1	209	1.09193	3.575	0.00031814	3.65705
1585	0	EAS	39.8277	124.121	0	NaN	1.18957	3.656	0.000243856	4.09897
1586	1	EAS	39.8654	124.327	1	234	0.977689	3.855	0.000207626	4.07767
1587	0	EAS	39.7719	124.751	0	NaN	0.484431	4.049	0.000152218	3.83401
1588	0	EAS	39.6723	124.95	0	NaN	0.484431	4.04	0.000222653	3.47939
1589	0	EAS	39.6254	125.042	0	NaN	0.484431	3.9545	0.000188594	3.47939
1590	0	EAS	39.608	125.224	0	NaN	0.484431	4.126	0.000185583	3.38208
1591	0	EAS	39.5822	125.436	1	306	0.484431	4.308	0.000167804	3.30821
1592	0	EAS	39.3828	125.401	0	NaN	0.484431	4.126	0.000251793	3.24768
1593	0	EAS	39.3089	125.433	0	NaN	0.484431	3.9975	0.000282713	3.24768
1594	0	EAS	38.998	125.207	0	NaN	0.893495	3.855	0.000503511	3.39115
1595	0	EAS	38.6506	125.599	1	314	0.935161	3.841	8.68184e-05	3.64987
1596	0	EAS	38.2262	124.968	0	NaN	0.786897	3.439	0.000682012	2.91292
1597	0	EAS	37.9874	125.814	0	NaN	0.838494	2.795	0.00024774	6.67694
1598	0	EAS	37.834	125.991	0	NaN	0.838494	2.795	0.000406522	6.67694
1599	0	EAS	37.7493	126.183	2	307, 308	0.838494	2.9845	0.000379161	6.42208
1600	0	EAS	36.939	126.984	1	305	0.731669	NaN	0.000297887	4.09607
1601	0	EAS	36.8372	126.85	0	NaN	0.731669	NaN	0.000399388	4.09607
1602	0	EAS	36.7881	126.849	1	312	0.731669	NaN	0.000222154	4.09607
1603	0	EAS	35.9989	126.69	1	309	0.809862	4.743	0.000262441	3.76749
1604	0	EAS	35.8592	126.693	1	310	0.809862	4.682	0.000266512	3.63139
1605	0	EAS	35.7503	126.779	0	NaN	0.809862	4.743	0.000223169	3.63139
1606	0	EAS	35.5406	126.595	0	NaN	0.809862	4.672	0.000213556	3.57335
1607	0	EAS	35.366	126.421	0	NaN	1.44643	4.672	0.000379061	3.6951
1608	0	EAS	35.2525	126.314	0	NaN	1.44643	4.621	0.000330322	3.6951
1609	0	EAS	34.7854	126.361	1	315	0.602581	4.116	0.00035627	3.10138
1610	0	EAS	34.6148	126.775	0	NaN	0.651746	2.8885	0.00016965	2.78632
1611	0	EAS	34.6313	126.956	0	NaN	0.651746	2.841	0.000393399	2.56898
1612	0	EAS	34.8327	127.365	0	NaN	0.95254	2.547	0.000160084	2.52987
1613	0	EAS	34.8754	127.517	0	NaN	0.95254	2.5445	0.000221849	2.52987
1614	0	EAS	34.926	127.602	0	NaN	0.95254	2.4615	0.000135712	2.58717
1615	0	EAS	34.9668	127.76	1	313	1.12658	2.323	0.000251312	2.58717
1616	0	EAS	35.076	128.041	0	NaN	0.730373	1.991	0.000294194	2.78291
1617	0	EAS	35.0446	128.369	0	NaN	0.730373	1.4825	0.000652732	2.93514
1618	1	EAS	35.0529	128.923	1	311	1.14805	0.994	0.00205311	3.45845
1619	0	EAS	35.1574	129.137	0	NaN	1.14805	0.635	0.00361245	3.61236
1620	0	EAS	35.3892	129.348	0	NaN	1.38296	0.402	0.00481017	3.93868
1621	0	EAS	35.5075	129.393	0	NaN	1.38296	0.331	0.00480414	4.13524
1622	0	EAS	36.0294	129.385	0	NaN	1.43801	0.266	0.00247498	3.37195
1623	0	EAS	36.2248	129.382	0	NaN	1.43801	0.268	0.00449967	3.18556
1624	0	EAS	36.3576	129.39	0	NaN	1.33289	0.27	0.00633969	3.18556
1625	0	EAS	36.5651	129.423	0	NaN	1.33289	0.279	0.00744592	3.33295
1626	0	EAS	36.7386	129.472	0	NaN	1.33289	0.2925	0.00788427	3.57736
1627	0	EAS	36.9688	129.411	0	NaN	1.45325	0.309	0.00876363	3.53722
1628	0	EAS	36.9773	129.407	0	NaN	1.45325	0.309	0.00832031	3.53722
1629	0	EAS	37.1016	129.376	0	NaN	1.45325	0.314	0.00729677	3.53722
1630	0	EAS	37.1623	129.351	0	NaN	1.45325	0.3155	0.00608527	3.53722
1631	0	EAS	37.3877	129.238	0	NaN	1.66425	0.33	0.00974489	2.86368
1632	0	EAS	37.4328	129.19	0	NaN	1.66425	0.3325	0.0109682	2.86368
1633	0	EAS	37.6258	129.05	0	NaN	1.50048	0.3435	0.0132255	2.25031
1634	0	EAS	37.7407	128.986	0	NaN	1.50048	0.345	0.0168234	2.30147
1635	0	EAS	37.7682	128.95	0	NaN	1.50048	0.345	0.0176165	2.30147
1636	0	EAS	38.1059	128.645	0	NaN	1.50048	0.356	0.0239255	3.24801
1637	0	EAS	38.4017	128.477	0	NaN	1.35573	0.361	0.0350353	3.66193
1638	0	EAS	38.4376	128.453	0	NaN	1.35573	0.3615	0.034044	3.66193
1639	1	EAS	38.6581	128.356	0	NaN	1.35573	0.3675	0.0293701	3.31782
1640	1	EAS	38.8444	128.085	0	NaN	1.18895	0.373	0.00374251	3.90285
1641	0	EAS	38.854	128.026	0	NaN	1.18895	0.376	0.00294884	4.16199
1642	1	EAS	38.8645	127.999	0	NaN	1.18895	0.376	0.00272686	4.16199
1643	0	EAS	38.9212	127.939	0	NaN	1.18895	0.376	0.00248931	4.16199
1644	0	EAS	38.9333	127.92	0	NaN	1.18895	0.377	0.00244254	4.00673
1645	0	EAS	39.0377	127.808	0	NaN	1.18895	0.378	0.00215267	4.00673
1646	0	EAS	39.1082	127.687	0	NaN	1.18895	0.38	0.00175708	4.0205
1647	0	EAS	39.1441	127.523	0	NaN	1.18895	0.382	0.00093916	3.84834
1648	0	EAS	39.1897	127.407	0	NaN	1.18895	0.383	0.000605096	3.74901
1649	0	EAS	39.2778	127.373	0	NaN	1.14494	0.383	0.000727386	3.74901
1650	1	EAS	39.3932	127.458	0	NaN	1.14494	0.383	0.00133989	3.74901
1651	1	EAS	39.6434	127.506	0	NaN	1.14494	0.384	0.00145327	3.55702
1652	1	EAS	39.8079	127.592	0	NaN	1.14494	0.3835	0.00112939	3.49167
1653	0	EAS	39.9989	127.949	0	NaN	1.14494	0.3815	0.00137177	3.30523
1654	0	EAS	40.0385	128.114	0	NaN	0.952619	0.38	0.00180678	3.29797
1655	1	EAS	40.1025	128.424	0	NaN	0.952619	0.379	0.00695857	3.14212
1656	0	EAS	40.1534	128.535	0	NaN	0.952619	0.379	0.00821414	3.14212
1657	0	EAS	40.3068	128.626	0	NaN	0.952619	0.379	0.00560585	3.26829
1658	1	EAS	40.434	128.949	0	NaN	1.30936	0.379	0.00974135	3.28567
1659	1	EAS	40.4663	129.012	0	NaN	1.30936	0.379	0.0103936	3.40026
1660	1	EAS	40.7104	129.265	0	NaN	1.19163	0.381	0.0205289	3.40026
1661	1	EAS	40.7582	129.391	0	NaN	1.19163	0.381	0.0155149	3.43602
1662	0	EAS	40.7959	129.497	0	NaN	1.19163	0.381	0.0243636	3.42983
1663	1	EAS	40.9992	129.727	0	NaN	1.26955	0.3825	0.0445385	3.36226
1664	0	EAS	41.0651	129.719	0	NaN	1.26955	0.383	0.0524384	3.36226
1665	0	EAS	41.106	129.715	0	NaN	1.26955	0.383	0.054721	3.36226
1666	0	EAS	41.4143	129.74	0	NaN	0.96922	0.385	0.0426747	3.19667
1667	0	EAS	41.4383	129.682	0	NaN	0.96922	0.3855	0.0210293	3.07715
1668	0	EAS	41.4716	129.657	0	NaN	0.96922	0.386	0.0206317	3.07715
1669	0	EAS	41.5597	129.65	0	NaN	0.96922	0.386	0.0234208	3.07715
1670	0	EAS	41.6505	129.691	0	NaN	0.96922	0.386	0.016254	3.07715
1671	0	EAS	41.7619	129.772	0	NaN	0.96922	0.3865	0.0124954	3.17387
1672	1	EAS	42.3321	130.381	0	NaN	1.24043	0.386	0.00269136	3.40808
1673	0	EAS	41.7059	140.023	0	NaN	2.12925	0.3355	0.0561656	3.10312
1674	0	EAS	41.8041	140.11	0	NaN	0.894358	0.3445	0.0474131	3.10312
1675	0	EAS	41.9289	140.14	0	NaN	0.894358	0.875	0.0407863	3.06858
1676	0	EAS	42.3882	139.823	0	NaN	2.61713	0.34	0.0589697	3.15709
1677	0	EAS	42.4239	139.845	0	NaN	2.61713	0.34	0.059386	3.05547
1678	0	EAS	42.7668	140.256	0	NaN	2.45408	0.3475	0.0185218	2.95288
1679	0	EAS	42.8792	140.365	0	NaN	2.45408	0.35	0.0209108	3.05181
1680	0	EAS	43.0217	140.532	0	NaN	2.39629	0.35	0.0137821	2.99683
1681	0	EAS	43.1941	140.79	0	NaN	1.97877	0.351	0.00384571	3.31114
1682	0	EAS	43.2687	141.371	1	285	1.97877	0.351	0.00168769	3.48578
1683	0	EAS	43.5831	141.385	0	NaN	1.97877	0.3515	0.00312718	3.32302
1684	0	EAS	43.96	141.641	0	NaN	1.83834	0.361	0.0029346	3.1291
1685	0	EAS	44.0272	141.663	0	NaN	1.83834	0.362	0.00285441	3.1291
1686	0	EAS	44.2777	141.651	0	NaN	2.12446	0.367	0.00274874	3.02809
1687	0	EAS	44.3771	141.707	0	NaN	2.12446	0.368	0.00265132	3.02809
1688	0	EAS	44.7192	141.784	0	NaN	2.12446	0.391	0.00314907	2.97695
1689	0	EAS	44.8799	141.74	1	299	1.54681	0.4155	0.00293192	2.96868
1690	0	EAS	45.135	142.386	0	NaN	1.68072	1.2895	0.00272046	3.68095
1691	0	EAS	44.8885	142.623	0	NaN	1.42108	1.3595	0.0035016	3.96957
1692	0	EAS	44.8423	142.657	0	NaN	1.42108	1.364	0.00336539	3.96957
1693	0	EAS	44.3802	143.323	0	NaN	1.38825	1.4005	0.00331577	4.37929
1694	0	EAS	44.2318	143.621	0	NaN	1.38825	1.39	0.00334753	4.45123
1695	0	EAS	44.0844	143.935	0	NaN	1.70996	1.3835	0.00256371	4.26641
1696	0	EAS	44.1244	144.082	0	NaN	1.70996	1.384	0.00472871	4.05938
1697	0	EAS	44.0228	144.276	0	NaN	1.1605	1.383	0.00663044	4.05938
1698	0	EAS	43.916	144.659	0	NaN	1.1605	1.384	0.00596923	4.06895
1699	1	EAS	43.7282	145.091	0	NaN	1.38696	1.4095	0.0013543	4.18603
1700	0	EAS	43.6721	145.128	0	NaN	1.38696	1.4515	0.00101074	4.17084
1701	0	EAS	43.3434	145.22	0	NaN	1.18356	1.509	0.000584103	4.12709
1702	1	EAS	43.3171	145.252	0	NaN	1.18356	1.515	0.000634718	4.12709
1703	1	EAS	43.0815	144.857	0	NaN	1.88241	1.561	0.00155487	4.05244
1704	0	EAS	42.9798	144.375	0	NaN	2.1533	1.564	0.00680604	3.80927
1705	0	EAS	43.004	144.275	0	NaN	2.1533	1.564	0.00564744	3.95762
1706	0	EAS	42.9772	144.149	0	NaN	1.93305	1.565	0.00539916	3.95762
1707	0	EAS	42.9473	144.068	0	NaN	1.93305	1.564	0.00371163	3.95762
1708	0	EAS	42.8818	143.931	0	NaN	1.93305	1.565	0.00301971	4.18607
1709	0	EAS	42.7242	143.704	0	NaN	1.64196	1.568	0.00261662	3.85922
1710	0	EAS	42.6937	143.658	1	300	1.64196	1.5665	0.0024562	3.85922
1711	0	EAS	42.4472	143.403	0	NaN	1.64196	1.568	0.00237104	3.47085
1712	0	EAS	42.3806	143.361	0	NaN	1.64196	1.57	0.00258233	3.47085
1713	0	EAS	42.3421	143.336	0	NaN	1.64196	1.57	0.00266982	3.47085
1714	0	EAS	42.3112	143.324	0	NaN	1.64196	1.57	0.00269472	3.47085
1715	0	EAS	42.1408	142.848	0	NaN	2.10818	1.579	0.00570448	3.25718
1716	0	EAS	42.3278	142.368	0	NaN	2.0065	1.598	0.0137153	3.53365
1717	0	EAS	42.4213	142.224	0	NaN	1.09012	1.599	0.00533384	3.79364
1718	0	EAS	42.478	142.074	0	NaN	1.09012	1.603	0.00380095	3.79364
1719	0	EAS	42.5038	142.016	0	NaN	1.09012	1.603	0.00294478	3.98989
1720	1	EAS	42.5648	141.911	0	NaN	1.09012	1.6045	0.00216795	3.98989
1721	0	EAS	42.6064	141.824	0	NaN	1.09012	1.6055	0.00230309	3.95384
1722	0	EAS	42.5372	141.34	0	NaN	1.11208	1.61	0.00525142	3.77001
1723	1	EAS	42.4718	140.837	0	NaN	1.41691	1.618	0.00274673	3.37829
1724	0	EAS	42.2668	140.279	0	NaN	0.894358	1.6215	0.00315452	3.13821
1725	0	EAS	41.7737	140.787	0	NaN	1.41691	1.614	0.00730829	3.10755
1726	0	EAS	41.6725	140.436	0	NaN	1.54741	1.272	0.00500616	3.1933
1727	0	EAS	41.5949	140.427	0	NaN	1.54741	1.2115	0.00789879	3.1933
1728	1	EAS	40.7445	141.286	0	NaN	1.78337	1.56	0.00177881	3.59686
1729	0	EAS	40.6052	141.463	0	NaN	1.78337	1.562	0.00309162	3.47745
1730	0	EAS	40.5887	141.469	0	NaN	1.78337	1.561	0.00306003	3.47745
1731	0	EAS	40.5401	141.502	0	NaN	1.78337	1.56	0.00307871	3.47745
1732	0	EAS	40.5273	141.521	0	NaN	1.78337	1.56	0.00318073	3.47745
1733	0	EAS	40.2008	141.796	0	NaN	1.80711	1.563	0.00440311	3.50403
1734	0	EAS	39.851	141.971	0	NaN	1.80711	1.561	0.00714879	3.45498
1735	0	EAS	39.6378	141.971	0	NaN	1.80711	1.5615	0.00802857	3.37915
1736	0	EAS	39.355	141.911	0	NaN	2.00536	1.564	0.00783027	3.44943
1737	0	EAS	39.0014	141.623	0	NaN	2.00536	1.566	0.00500874	2.72775
1738	0	EAS	38.7674	141.513	0	NaN	1.82221	1.574	0.00559592	2.72775
1739	0	EAS	38.576	141.459	0	NaN	1.82221	1.574	0.00489627	2.72291
1740	0	EAS	38.4508	141.292	1	289	1.82221	1.5855	0.00127807	2.72291
1741	0	EAS	38.3834	141.17	0	NaN	1.82221	1.586	0.00151988	2.98693
1742	0	EAS	38.3747	141.07	0	NaN	1.27673	1.596	0.00133761	2.98693
1743	0	EAS	38.2523	141.011	0	NaN	1.27673	1.603	0.00147255	2.98693
1744	0	EAS	38.176	140.959	0	NaN	1.27673	1.603	0.00148957	3.78088
1745	0	EAS	38.0468	140.919	1	279	1.27673	1.603	0.00145887	3.78088
1746	0	EAS	37.6861	141.012	0	NaN	1.27673	1.584	0.00193188	3.25608
1747	0	EAS	37.59	141.025	0	NaN	1.27673	1.577	0.00209585	3.25608
1748	0	EAS	37.5699	141.026	0	NaN	1.27673	1.572	0.00234402	3.25608
1749	0	EAS	37.4847	141.04	0	NaN	2.17652	1.571	0.0026801	3.25608
1750	0	EAS	37.2635	141.015	0	NaN	1.80294	1.559	0.00392779	3.39733
1751	0	EAS	37.0575	140.972	0	NaN	1.80294	1.558	0.00446529	3.26225
1752	0	EAS	36.9344	140.872	0	NaN	1.80294	1.5525	0.00388027	3.94337
1753	0	EAS	36.9067	140.806	0	NaN	1.80294	1.553	0.00300846	3.94337
1754	0	EAS	36.795	140.756	0	NaN	1.80294	1.554	0.00336496	3.94337
1755	0	EAS	36.4825	140.614	0	NaN	2.02043	1.553	0.00306863	4.3896
1756	0	EAS	36.3339	140.594	0	NaN	2.02043	1.554	0.00293861	3.90252
1757	0	EAS	35.7437	140.852	1	301	2.4519	1.545	0.00317752	3.23496
1758	0	EAS	35.6091	140.533	0	NaN	2.4519	1.561	0.00149297	2.64721
1759	0	EAS	35.5761	140.493	0	NaN	2.4519	1.565	0.00150215	2.64721
1760	0	EAS	35.5376	140.462	0	NaN	2.37119	1.566	0.00132468	2.64721
1761	0	EAS	35.4977	140.431	0	NaN	2.37119	1.568	0.00129731	2.59938
1762	0	EAS	35.4491	140.408	0	NaN	2.37119	1.567	0.00131217	2.59938
1763	0	EAS	35.3922	140.394	0	NaN	2.37119	1.568	0.00149644	2.59938
1764	0	EAS	35.2955	140.406	0	NaN	2.37119	1.568	0.00306413	2.59938
1765	0	EAS	35.097	140.105	0	NaN	1.95379	1.614	0.0258295	3.83109
1766	0	EAS	35.0103	139.859	0	NaN	1.95379	1.6425	0.011366	4.15891
1767	0	EAS	35.2181	139.863	0	NaN	1.95379	1.637	0.0040111	3.71594
1768	0	EAS	35.3416	139.863	0	NaN	1.95379	1.6445	0.00148518	3.71594
1769	1	EAS	35.4087	139.898	0	NaN	1.95379	1.637	0.00109091	3.71594
1770	0	EAS	35.5357	140.074	0	NaN	1.95379	1.602	0.000602467	3.33235
1771	1	EAS	35.6709	139.95	0	NaN	1.95379	1.621	0.000754924	4.08194
1772	1	EAS	35.6429	139.845	0	NaN	1.95379	1.637	0.000959027	4.08194
1773	0	EAS	35.5413	139.761	0	NaN	1.95379	1.682	0.000858386	4.08194
1774	0	EAS	35.4846	139.681	0	NaN	1.14412	1.703	0.00103507	4.34588
1775	1	EAS	35.3054	139.481	0	NaN	1.14412	1.713	0.0263892	4.79561
1776	0	EAS	35.322	139.369	0	NaN	1.14412	1.7225	0.0354249	4.79561
1777	0	EAS	35.2606	139.185	0	NaN	1.14412	1.723	0.0379887	5.08242
1778	0	EAS	34.6713	138.948	0	NaN	1.87198	1.734	0.0182435	3.40805
1779	0	EAS	34.6307	138.887	0	NaN	1.87198	1.759	0.0245228	3.40805
1780	0	EAS	35.0799	138.856	0	NaN	1.87198	1.734	0.0356702	5.37658
1781	1	EAS	35.1154	138.635	1	282	1.95635	1.765	0.032377	5.29292
1782	1	EAS	34.9292	138.398	0	NaN	1.95635	1.7695	0.0338277	4.54091
1783	0	EAS	34.8754	138.331	0	NaN	1.95635	1.7705	0.0246237	4.54091
1784	0	EAS	34.7712	138.291	1	295	1.95635	1.7705	0.0193669	4.54091
1785	0	EAS	34.667	137.899	0	NaN	1.85861	1.774	0.0167515	3.45391
1786	1	EAS	34.6489	137.792	1	298	1.85861	1.769	0.0184708	3.22389
1787	0	EAS	34.7949	137.646	0	NaN	1.78795	1.775	0.00192016	3.62724
1788	0	EAS	34.7257	137.352	0	NaN	1.78795	1.7825	0.00152765	3.16843
1789	0	EAS	34.7777	137.336	0	NaN	1.78795	1.783	0.000856657	3.16843
1790	1	EAS	34.8211	136.971	0	NaN	1.56964	1.794	0.00108125	3.15467
1791	0	EAS	34.904	136.974	0	NaN	1.56964	1.801	0.000458805	3.15467
1792	0	EAS	35.0594	136.836	0	NaN	1.56964	1.944	7.76858e-05	2.70993
1793	0	EAS	35.042	136.74	1	288	1.56964	1.975	8.70841e-05	2.70993
1794	0	EAS	35.0341	136.713	0	NaN	1.56964	1.975	0.000149968	2.70993
1795	0	EAS	35.0243	136.698	0	NaN	1.56964	1.975	0.000228073	3.01071
1796	0	EAS	35.0089	136.683	0	NaN	1.56964	1.975	0.000354346	3.01071
1797	1	EAS	34.9631	136.646	0	NaN	1.56964	1.975	0.00114396	3.01071
1798	1	EAS	34.9316	136.647	0	NaN	1.56964	1.876	0.00131998	3.01071
1799	0	EAS	34.8071	136.568	0	NaN	1.56964	1.808	0.00173905	3.01071
1800	0	EAS	34.731	136.527	0	NaN	1.56964	1.808	0.00157272	3.01071
1801	0	EAS	34.7103	136.524	0	NaN	1.56964	1.808	0.00128365	3.01071
1802	1	EAS	34.6353	136.549	0	NaN	1.56964	1.801	0.0012588	3.53933
1803	1	EAS	34.6106	136.569	0	NaN	1.56964	1.794	0.00122781	3.53933
1804	1	EAS	34.5418	136.725	0	NaN	1.56964	1.793	0.00156661	3.53933
1805	0	EAS	34.5157	136.746	0	NaN	1.56964	1.793	0.0016384	3.53933
1806	0	EAS	34.3661	136.814	0	NaN	1.56964	1.7845	0.00262138	3.78352
1807	0	EAS	34.2044	136.337	0	NaN	1.75907	1.789	0.00897823	3.72608
1808	0	EAS	34.1041	136.231	0	NaN	1.75907	1.789	0.00935559	3.5332
1809	0	EAS	33.7269	136.008	1	290	1.95058	1.7915	0.048265	3.62418
1810	0	EAS	33.5783	135.928	0	NaN	1.95058	1.785	0.0477962	3.33227
1811	0	EAS	33.5286	135.816	0	NaN	1.95058	1.79	0.0357141	3.33227
1812	0	EAS	33.5596	135.447	0	NaN	1.78826	1.799	0.047877	3.07709
1813	0	EAS	33.6376	135.393	0	NaN	1.78826	1.8135	0.0256864	3.07709
1814	0	EAS	33.7312	135.372	0	NaN	1.78826	1.824	0.00812221	3.07709
1815	0	EAS	33.8762	135.155	0	NaN	1.23295	1.84	0.00388887	2.97412
1816	1	EAS	34.0782	134.601	1	303	1.23295	1.911	0.00200482	2.81587
1817	0	EAS	34.0389	134.587	0	NaN	1.23295	1.907	0.00180915	2.81587
1818	1	EAS	33.9441	134.699	0	NaN	1.23295	1.8825	0.00274386	2.81587
1819	0	EAS	33.5946	134.362	0	NaN	1.64355	1.835	0.0119146	2.83094
1820	0	EAS	33.4225	134.011	0	NaN	2.05759	1.828	0.0108083	1.95628
1821	0	EAS	33.4344	133.983	0	NaN	2.05759	1.828	0.00977986	1.95628
1822	0	EAS	33.4933	133.916	0	NaN	2.05759	1.828	0.00662898	1.95628
1823	0	EAS	33.4947	133.911	0	NaN	2.05759	1.8315	0.00661646	1.95628
1824	0	EAS	33.5347	133.685	0	NaN	1.83763	1.845	0.00368518	2.04774
1825	0	EAS	33.551	133.559	0	NaN	1.83763	1.848	0.00287624	2.04774
1826	0	EAS	33.4582	133.48	0	NaN	1.83763	1.8515	0.0038926	1.61686
1827	0	EAS	32.9334	132.995	0	NaN	2.16702	1.8685	0.00541191	3.06085
1828	0	EAS	32.9251	132.709	0	NaN	1.43361	1.891	0.0047499	3.52147
1829	0	EAS	33.1226	132.499	0	NaN	1.43361	1.912	0.0028421	2.97324
1830	0	EAS	33.6123	132.476	0	NaN	0.584954	2.0105	0.00268484	1.48163
1831	0	EAS	33.8057	132.688	0	NaN	0.584954	1.958	0.00251402	1.70483
1832	0	EAS	33.9088	133.13	0	NaN	0.584954	1.857	0.00125976	2.37912
1833	0	EAS	33.9214	133.15	0	NaN	0.584954	1.857	0.00149015	2.37912
1834	0	EAS	33.9758	133.289	0	NaN	NaN	1.852	0.00113617	3.01298
1835	0	EAS	34.128	133.638	0	NaN	NaN	13.251	0.000984832	2.65516
1836	1	EAS	34.2533	134.358	0	NaN	0.647589	8.764	0.00168252	2.99567
1837	0	EAS	34.0813	135.101	0	NaN	1.23295	1.8825	0.00298383	2.83753
1838	0	EAS	34.1869	135.181	0	NaN	1.23295	1.911	0.00230754	2.58986
1839	0	EAS	34.2218	135.136	0	NaN	1.23295	1.952	0.00255157	2.58986
1840	0	EAS	34.6081	135.442	0	NaN	0.717859	NaN	0.000793192	2.39688
1841	1	EAS	34.6825	135.42	1	302	0.717859	NaN	0.00078716	2.39688
1842	0	EAS	34.6948	135.373	0	NaN	0.717859	NaN	0.000856099	2.39688
1843	0	EAS	34.7337	134.807	0	NaN	0.717859	11.8045	0.00163106	2.36207
1844	0	EAS	34.7786	134.678	0	NaN	0.647589	12.052	0.00126435	2.65421
1845	0	EAS	34.7902	134.647	0	NaN	0.647589	12.052	0.00129361	2.65421
1846	1	EAS	34.768	134.571	0	NaN	0.647589	12.2205	0.00137882	2.65421
1847	0	EAS	34.7358	134.39	0	NaN	0.647589	12.2205	0.00136655	3.34781
1848	0	EAS	34.61	134.041	0	NaN	0.647589	12.389	0.000944829	3.56084
1849	1	EAS	34.6013	133.972	0	NaN	0.647589	12.389	0.000938852	3.56084
1850	0	EAS	34.5916	133.912	0	NaN	0.647589	12.389	0.000932465	3.56084
1851	0	EAS	34.5456	133.696	0	NaN	NaN	13.1415	0.000783735	3.66393
1852	0	EAS	34.4362	133.408	0	NaN	NaN	15.437	0.00094064	3.47072
1853	0	EAS	34.3863	133.086	0	NaN	0.584954	1.958	0.00089838	3.5749
1854	0	EAS	34.2307	132.607	0	NaN	0.584954	1.9265	0.00146459	3.1806
1855	1	EAS	34.3606	132.407	0	NaN	0.584954	1.9265	0.00100793	2.92005
1856	0	EAS	34.2091	132.239	0	NaN	0.497872	1.9845	0.0010989	2.44319
1857	1	EAS	34.1278	132.225	0	NaN	0.497872	2.011	0.00125074	2.44319
1858	0	EAS	33.9612	131.927	0	NaN	0.497872	2.149	0.00188282	2.74848
1859	0	EAS	34.0345	131.495	0	NaN	0.497872	2.149	0.00124014	2.97863
1860	0	EAS	34.0475	131.394	0	NaN	1.90971	2.149	0.000770415	2.97863
1861	0	EAS	33.9602	131.217	0	NaN	1.90971	2.179	0.000829759	3.02617
1862	0	EAS	34.0182	131.147	0	NaN	1.90971	2.059	0.00050692	3.02617
1863	0	EAS	34.0608	131.04	0	NaN	1.90971	1.197	0.000802778	2.95636
1864	0	EAS	33.7489	131.006	0	NaN	1.69096	2.149	0.000646917	3.19067
1865	0	EAS	33.7322	131.015	0	NaN	1.69096	2.149	0.000638208	3.19067
1866	0	EAS	33.6556	131.063	0	NaN	1.69096	2.1995	0.000451176	3.59432
1867	0	EAS	33.6174	131.169	0	NaN	NaN	2.1995	0.000794188	3.59432
1868	1	EAS	33.6197	131.186	0	NaN	NaN	2.1995	0.000672763	3.59432
1869	0	EAS	33.5862	131.268	0	NaN	NaN	2.1995	0.000723655	3.59432
1870	0	EAS	33.5799	131.298	0	NaN	0.914726	2.22	0.000801918	3.59432
1871	0	EAS	33.5749	131.368	0	NaN	0.914726	2.214	0.000947796	3.70909
1872	0	EAS	33.5731	131.428	0	NaN	0.914726	2.1965	0.00106266	3.70909
1873	0	EAS	33.4614	131.725	0	NaN	0.914726	2.174	0.00289668	3.63465
1874	0	EAS	33.2485	131.619	0	NaN	1.16399	2.1465	0.00147716	4.16705
1875	1	EAS	33.2647	131.698	0	NaN	0.914726	2.1465	0.0025033	4.16705
1876	0	EAS	33.1286	131.81	0	NaN	1.16399	2.107	0.0024889	4.31124
1877	0	EAS	32.9468	131.908	0	NaN	1.16399	1.941	0.00289276	4.31124
1878	1	EAS	32.5815	131.704	0	NaN	1.68915	1.902	0.00432566	4.56508
1879	0	EAS	32.4688	131.652	0	NaN	1.68915	1.897	0.00458163	4.56508
1880	0	EAS	32.4071	131.644	0	NaN	1.68915	1.8975	0.00460753	3.77274
1881	0	EAS	32.3383	131.614	0	NaN	1.68915	1.897	0.00546949	3.77274
1882	0	EAS	32.1283	131.534	0	NaN	1.98434	1.897	0.00676702	2.99703
1883	0	EAS	32.0457	131.508	0	NaN	1.98434	1.896	0.00498755	2.99703
1884	0	EAS	32.0109	131.493	0	NaN	1.98434	1.896	0.00390567	2.99703
1885	0	EAS	31.8926	131.462	0	NaN	1.92145	1.897	0.00317581	2.66954
1886	0	EAS	31.8358	131.448	0	NaN	1.92145	1.8975	0.0032477	2.66954
1887	0	EAS	31.8161	131.454	0	NaN	1.92145	1.8975	0.00350707	2.66954
1888	0	EAS	31.5901	131.409	0	NaN	1.92145	1.906	0.00595289	2.98566
1889	0	EAS	31.5455	131.381	0	NaN	1.92145	1.907	0.0062029	2.98566
1890	0	EAS	31.4486	131.212	0	NaN	1.92145	1.917	0.00393487	3.11089
1891	0	EAS	31.4444	131.055	0	NaN	1.86798	1.9275	0.00358633	2.80291
1892	0	EAS	31.358	131.006	0	NaN	1.86798	1.9415	0.0033922	2.80291
1893	0	EAS	31.2808	131.075	0	NaN	1.86798	1.9345	0.00449105	3.11089
1894	0	EAS	31.2169	130.763	0	NaN	1.86798	2.0075	0.00518025	2.80291
1895	0	EAS	31.4865	130.693	0	NaN	1.28854	2.03	0.00561518	2.55669
1896	0	EAS	31.712	130.741	0	NaN	NaN	1.93	0.00222606	2.55669
1897	0	EAS	31.7294	130.641	0	NaN	1.14988	2.186	0.00379738	2.55669
1898	0	EAS	31.7076	130.621	0	NaN	1.14988	2.186	0.00421739	2.55669
1899	0	EAS	31.5727	130.568	0	NaN	1.14988	2.223	0.00610999	2.55436
1900	0	EAS	31.521	130.538	0	NaN	1.28854	2.266	0.00743093	2.55436
1901	0	EAS	31.2701	130.287	0	NaN	1.28854	2.276	0.0114905	2.84557
1902	0	EAS	31.4432	130.296	0	NaN	1.14988	2.33	0.00252003	2.55436
1903	0	EAS	31.5042	130.32	0	NaN	1.14988	2.355	0.00241313	2.55436
1904	0	EAS	31.6947	130.285	0	NaN	1.14988	2.418	0.00267794	2.54779
1905	0	EAS	31.7203	130.262	0	NaN	1.14988	2.42	0.00265022	2.54779
1906	0	EAS	31.8452	130.203	0	NaN	1.57076	2.42	0.00307103	2.23
1907	0	EAS	32.0192	130.192	0	NaN	1.57076	2.454	0.0026847	2.11601
1908	0	EAS	32.1091	130.285	0	NaN	1.57076	2.42	0.00188607	2.11601
1909	0	EAS	32.1242	130.334	0	NaN	1.57076	2.454	0.00159678	2.32135
1910	0	EAS	32.2237	130.396	0	NaN	1.57076	2.281	0.00139662	2.61464
1911	1	EAS	32.5052	130.548	0	NaN	1.28105	0.875	0.00110816	3.47409
1912	0	EAS	32.5929	130.644	0	NaN	1.28105	0.866	0.000626775	3.47409
1913	0	EAS	32.6108	130.659	0	NaN	1.28105	0.866	0.000574537	3.47409
1914	0	EAS	32.7106	130.605	0	NaN	1.28105	0.875	0.00112679	3.92411
1915	0	EAS	32.7796	130.605	0	NaN	1.28105	0.875	0.00142541	3.92411
1916	0	EAS	32.7911	130.614	0	NaN	1.28105	0.875	0.00165389	3.92411
1917	0	EAS	32.8843	130.53	0	NaN	1.28105	0.875	0.00114595	3.69753
1918	0	EAS	33.0939	130.423	0	NaN	NaN	0.875	0.000677433	3.74253
1919	1	EAS	33.1408	130.356	1	281	NaN	0.888	0.000396774	3.74253
1920	0	EAS	33.2001	130.25	0	NaN	NaN	0.888	0.000250083	4.02536
1921	0	EAS	33.1929	130.229	0	NaN	NaN	0.888	0.000337444	4.02536
1922	0	EAS	33.1242	130.122	0	NaN	1.10223	1.1515	0.000436725	4.02536
1923	0	EAS	32.8634	130.091	0	NaN	1.28105	1.886	0.00125171	3.84711
1924	0	EAS	32.7664	129.955	0	NaN	1.28105	2.3675	0.00177619	4.35193
1925	0	EAS	32.7498	129.866	0	NaN	1.28105	2.4645	0.00224809	4.35193
1926	0	EAS	32.9165	129.662	0	NaN	1.10223	2.4885	0.00260138	4.63231
1927	1	EAS	32.9608	129.929	0	NaN	1.10223	1.93	0.000374456	4.73006
1928	0	EAS	33.0637	129.863	0	NaN	1.10223	1.7495	0.000743188	4.73006
1929	0	EAS	33.0873	129.795	0	NaN	1.10223	2.097	0.00112584	5.14906
1930	0	EAS	33.1634	129.72	0	NaN	1.10223	2.264	0.00137979	5.14906
1931	0	EAS	33.1706	129.662	0	NaN	1.10223	2.3705	0.00192756	5.14906
1932	0	EAS	33.2222	129.637	0	NaN	1.10223	2.2515	0.00155809	4.82984
1933	0	EAS	33.2826	129.858	0	NaN	1.46218	1.569	0.000796608	4.44326
1934	0	EAS	33.4499	129.981	0	NaN	1.46218	1.42	0.00132041	4.44326
1935	0	EAS	33.5927	130.345	0	NaN	1.69096	1.337	0.00129381	3.20232
1936	0	EAS	33.6031	130.397	0	NaN	1.69096	1.376	0.00126005	3.20232
1937	0	EAS	33.6084	130.407	0	NaN	1.69096	1.376	0.00118375	3.20232
1938	0	EAS	33.6353	130.432	0	NaN	1.69096	1.376	0.00137451	3.20232
1939	0	EAS	33.852	130.5	0	NaN	1.69096	1.149	0.00269702	2.85509
1940	0	EAS	33.8966	130.664	0	NaN	1.69096	1.264	0.00209066	3.00312
1941	0	EAS	34.0102	130.917	0	NaN	1.69096	1.264	0.00123828	2.95636
1942	0	EAS	34.3632	130.976	0	NaN	1.90971	0.838	0.00404086	2.84985
1943	0	EAS	34.3774	131.037	0	NaN	1.90971	0.838	0.00360569	2.84985
1944	1	EAS	34.4147	131.372	0	NaN	1.90971	0.676	0.00353263	2.80616
1945	0	EAS	34.6518	131.663	0	NaN	2.20334	0.5115	0.00429192	2.5834
1946	0	EAS	34.6938	131.823	0	NaN	1.9296	0.473	0.00434716	2.51191
1947	0	EAS	34.7016	131.837	0	NaN	1.9296	0.473	0.00451832	2.51191
1948	0	EAS	34.7878	131.939	0	NaN	1.9296	0.4735	0.00506126	2.51191
1949	0	EAS	35.0238	132.227	1	283	1.9296	0.3815	0.00626863	2.51242
1950	0	EAS	35.2082	132.467	0	NaN	2.1979	0.3605	0.00597407	2.82888
1951	0	EAS	35.3713	132.678	0	NaN	2.1979	0.341	0.00569931	3.24317
1952	1	EAS	35.5055	133.714	0	NaN	2.21571	0.337	0.003343	3.61331
1953	0	EAS	35.4983	133.756	0	NaN	2.25621	0.3365	0.0035005	3.61331
1954	0	EAS	35.503	133.858	0	NaN	2.25621	0.336	0.00359372	3.23329
1955	0	EAS	35.5067	133.876	0	NaN	2.25621	0.336	0.00365938	3.23329
1956	0	EAS	35.5224	134.081	0	NaN	2.25621	0.335	0.00441209	2.98651
1957	0	EAS	35.5395	134.196	0	NaN	2.25621	0.335	0.00563011	2.98651
1958	0	EAS	35.5808	134.295	0	NaN	2.43072	0.335	0.00796661	2.98651
1959	0	EAS	35.6286	134.454	0	NaN	2.43072	0.334	0.0084354	2.99237
1960	0	EAS	35.6403	134.616	0	NaN	2.43072	0.334	0.00857606	3.11809
1961	0	EAS	35.6425	134.827	0	NaN	2.52223	0.333	0.00735378	3.27764
1962	0	EAS	35.5599	135.158	0	NaN	2.52223	0.333	0.00268676	3.37787
1963	0	EAS	35.5145	135.288	0	NaN	2.501	0.332	0.00343692	3.37787
1964	0	EAS	35.4569	135.327	0	NaN	2.501	0.332	0.00253814	3.38203
1965	0	EAS	35.5025	135.745	0	NaN	2.501	0.332	0.00350898	3.31548
1966	0	EAS	36.2191	136.134	1	292	2.32335	0.3345	0.00660078	3.42146
1967	0	EAS	36.2956	136.243	0	NaN	2.54591	0.335	0.00551764	3.42146
1968	0	EAS	36.3661	136.347	0	NaN	2.54591	0.335	0.00548488	3.31309
1969	0	EAS	36.4216	136.419	0	NaN	2.54591	0.335	0.00456016	3.31309
1970	0	EAS	36.4875	136.48	0	NaN	2.54591	0.336	0.0038805	3.34631
1971	0	EAS	36.6013	136.586	0	NaN	2.55208	0.336	0.00365569	3.28444
1972	0	EAS	36.903	136.768	0	NaN	2.55208	0.339	0.00350728	3.31741
1973	0	EAS	37.0038	136.767	0	NaN	2.55208	0.34	0.00318517	3.27955
1974	0	EAS	37.3987	136.901	0	NaN	2.46013	0.341	0.0050221	3.42057
1975	0	EAS	37.4524	137.068	0	NaN	2.46013	0.341	0.00383466	3.41078
1976	0	EAS	37.4369	137.266	0	NaN	2.14039	0.341	0.00868516	3.56092
1977	0	EAS	37.1063	136.865	0	NaN	2.55208	0.3405	0.00170189	3.42742
1978	0	EAS	36.7937	137.066	1	297	1.39892	0.34	0.0291965	3.64354
1979	0	EAS	36.7885	137.074	0	NaN	1.39892	0.34	0.0287523	3.64354
1980	0	EAS	36.7598	137.222	1	287	1.39892	0.3415	0.0282276	3.64354
1981	0	EAS	36.7565	137.295	0	NaN	1.39892	0.34	0.0272675	3.81642
1982	0	EAS	36.7573	137.302	0	NaN	1.39892	0.34	0.025875	3.81642
1983	0	EAS	36.7998	137.381	0	NaN	1.39892	0.34	0.0333385	3.81642
1984	1	EAS	36.8603	137.409	0	NaN	1.39892	0.34	0.0413295	3.81642
1985	1	EAS	36.9214	137.426	1	291	1.39892	0.34	0.0492433	3.81642
1986	0	EAS	36.9606	137.543	0	NaN	1.39892	0.3395	0.0477368	3.85771
1987	1	EAS	37.041	137.831	0	NaN	1.39892	0.336	0.0364853	3.84878
1988	0	EAS	37.1007	137.98	0	NaN	2.06304	0.337	0.0298035	3.84878
1989	0	EAS	37.1818	138.247	0	NaN	2.06304	0.336	0.00659283	3.76533
1990	0	EAS	37.3895	138.565	0	NaN	1.42438	0.337	0.00876866	3.7131
1991	1	EAS	37.9603	139.127	2	280, 296	1.59988	0.338	0.00372808	3.87496
1992	0	EAS	38.0221	139.279	0	NaN	1.59988	0.338	0.00307846	3.87496
1993	0	EAS	38.0982	139.369	0	NaN	1.59988	0.338	0.00369919	4.20565
1994	0	EAS	38.1501	139.411	0	NaN	2.53239	0.338	0.00373869	4.20565
1995	0	EAS	38.2428	139.45	0	NaN	2.53239	0.338	0.00358044	3.89009
1996	0	EAS	38.8478	139.786	0	NaN	2.69778	0.3345	0.00365962	3.20832
1997	0	EAS	38.9211	139.812	1	293	2.69778	0.336	0.0038348	3.20832
[truncated: 3,402 more rows]

## Sheet: Region_Codes
Region Code	Region Description
AFR	mainland Africa
AUS	Australia, New Zealand, New Guinea
BLS	Black Sea, Sea of Azov
CAM	Central America
EAS	East Asia
EUR	Europe
MAD	Madagascar
MED	Mediterranean
MID	Middle East
NAM	North America
RUS	Russia
SAM	South America
SAS	South Asia
SEA	Southeast Asia
